# Supplementary material for: Strophanthidin Induces Apoptosis of Human Lung Adenocarcinoma Cells by Promoting TRAIL-DR5 Signaling
Source: Molecules. 2024 Feb 16;29(4):877. doi: 10.3390/molecules29040877 (PMC10892344; doi:10.3390/molecules29040877)
Supplement: Supplementary file 1 [file molecules-29-00877-s001.zip › molecules-2853623-Tables S1 and S2.xlsx]

## Sheet: Sheet1
ds	Protein FDR Confidence: Combined	Master	Accession	Description			Coverage [%]	# Peptides	# PSMs	# Unique Peptides	# AAs	MW [kDa]	calc. pI	Score Sequest HT: Sequest HT	# Peptides (by Search Engine): Sequest HT	Biological Process	Cellular Component	Molecular Function	Pfam IDs	Entrez Gene ID	Ensembl Gene ID		Gene Symbol		Chromosome	KEGG Pathways	WikiPathways	Reactome Pathways	# Protein Pathway Groups	Abundance Ratio: (Sample) / (Control)	Abundance Ratio P-Value: (Sample) / (Control)	Abundance Ratio Adj. P-Value: (Sample) / (Control)	Abundance Ratio Variability [%]: (Sample) / (Control)	Abundances (Grouped): Control	Abundances (Grouped): Sample	Abundances (Grouped) CV [%]: Control	Abundances (Grouped) CV [%]: Sample	Found in Sample: [S1] F1: 126, Control, re1, Control	Found in Sample: [S2] F1: 127N, Control, re2, Control	Found in Sample: [S3] F1: 127C, Control, re3, Control	Found in Sample: [S4] F1: 128N, Sample, re1, Sample	Found in Sample: [S5] F1: 128C, Sample, re2, Sample	Found in Sample: [S6] F1: 131, Sample, re3, Sample	# Protein Groups	Modifications
FALSE	High	Master Protein	P84103	Serine/arginine-rich splicing factor 3	OS=Homo sapiens]		37	6	17	6	164	19.3	11.65	21.5	6	metabolic process;regulation of biological process;transport	cytoplasm;nucleus	protein binding;RNA binding	Pf00076, Pf13893, Pf14259	6428	ENSG00000112081.16		SRSF3		6	Spliceosome; Herpes simplex infection	mRNA Processing	Cleavage of Growing Transcript in the Termination Region ; Transport of Mature mRNA derived from an Intron-Containing Transcript; mRNA 3'-end processing; mRNA Splicing - Major Pathway	14	0.476	0.0229106	0.456585	0.99	4527.6	2735.4	15.25	15.54	High	High	High	High	High	High	1
FALSE	High	Master Protein	Q9NPA3	Mid1-interacting protein 1	OS=Homo sapiens]		20	3	3	3	183	20.2	5.5	6.16	3	cell organization and biogenesis;metabolic process;regulation of biological process;transport	cytoplasm;cytoskeleton;cytosol;nucleus	protein binding	Pf07084	58526	ENSG00000165175.15		MID1IP1		X			Import of palmitoyl-CoA into the mitochondrial matrix	4	0.479	0.0246536	0.46361	24.71	1245.1	602.1	11.9	7.32	High	High	High	High	High	High	1
FALSE	High	Master Protein	P45877	peptidyl-prolyl cis-trans isomerase C	OS=Homo sapiens]		8	2	7	1	212	22.7	8.4	9.64	2	metabolic process	cytoplasm	catalytic activity;protein binding	Pf00160	5480	ENSG00000168938.5		PPIC		5				0	0.585	0.00781456	0.433092	7.65	25.6	15	12.64	28.79	High	High	High	High	High	High	1
FALSE	High	Master Protein	P20908	Collagen alpha-1(V) chain	OS=Homo sapiens]		1	2	2	2	1838	183.4	5.06	1.68	2	cell organization and biogenesis;cellular component movement;metabolic process;regulation of biological process	extracellular;organelle lumen	metal ion binding;protein binding;structural molecule activity	Pf01391, Pf01410, Pf02210, Pf13385	1289	ENSG00000130635.15		COL5A1		9	Protein digestion and absorption	Allograft Rejection; miRNA targets in ECM and membrane receptors; Focal Adhesion; Focal Adhesion-PI3K-Akt-mTOR-signaling pathway; miR-509-3p alteration of YAP1/ECM axis	ECM proteoglycans; Collagen degradation; Integrin cell surface interactions; Assembly of collagen fibrils and other multimeric structures; MET activates PTK2 signaling; Collagen chain trimerization; NCAM1 interactions; Signaling by PDGF; Syndecan interactions	27	0.588	0.0259876	0.46361	18.02	24.2	12.4	8.96	23.03	High	High	High	High	High	High	1
FALSE	High	Master Protein	Q9NYJ1-1	Cytochrome c oxidase assembly factor 4 homolog, mitochondrial	OS=Homo sapiens]		46	3	3	3	87	10.1	6.04	9.08	3	cell organization and biogenesis	mitochondrion		Pf06747	51287	ENSG00000181924.6		COA4		11			Mitochondrial protein import; Metabolism of proteins	2	0.589	0.0480211	0.479125	37.72	143.7	84.7	4.63	31.74	High	High	High	High	High	High	1
FALSE	High	Master Protein	O15294	UDP-N-acetylglucosamine--peptide N-acetylglucosaminyltransferase 110 kDa subunit	OS=Homo sapiens]		6	5	5	5	1046	116.9	6.7	9.9	5	cell death;cell organization and biogenesis;metabolic process;regulation of biological process;response to stimulus	cytoplasm;cytosol;membrane;mitochondrion;nucleus	catalytic activity;protein binding	Pf00515, Pf04184, Pf07719, Pf13176, Pf13181, Pf13374, Pf13414, Pf13424, Pf13428, Pf13429, Pf13431, Pf13432, Pf13844, Pf14559	8473	ENSG00000147162.13		OGT		X	Other types of O-glycan biosynthesis; Insulin resistance	Ectoderm Differentiation	HATs acetylate histones; UCH proteinases	10	0.615	0.0357735	0.46361	13.73	1330.2	818.4	13.64	1.81	High	High	High	High	High	High	1
FALSE	High	Master Protein	P37268	squalene synthase	OS=Homo sapiens]		6	2	2	2	417	48.1	6.54	2.42	2	metabolic process;regulation of biological process	endoplasmic reticulum;membrane	catalytic activity;protein binding	Pf00494	2222	ENSG00000079459.12		FDFT1		8	Steroid biosynthesis; Metabolic pathways	Cholesterol Biosynthesis; Sterol Regulatory Element-Binding Proteins (SREBP) signalling; Statin Pathway	Cholesterol biosynthesis; PPARA activates gene expression; Activation of gene expression by SREBF (SREBP)	13	0.616	0.0392033	0.46361	2.95	408.1	255.7	14.5	6.62	High	High	High	High	High	High	1
FALSE	Medium	Master Protein	Q5W111	SPRY domain-containing protein 7	OS=Homo sapiens]		4	1	1	1	196	21.7	6.7	0	1			protein binding	Pf00622	57213	ENSG00000123178.14		SPRYD7		13				0	0.622	0.0256658	0.46361	13.79	164.9	96.8	10.28	18.16	High	High	High	High	High	High	1
FALSE	High	Master Protein	Q01581	hydroxymethylglutaryl-CoA synthase, cytoplasmic	OS=Homo sapiens]		28	13	28	13	520	57.3	5.41	47.98	13	metabolic process;regulation of biological process;response to stimulus	cytoplasm;cytosol	catalytic activity;protein binding	Pf01154, Pf08540	3157	ENSG00000112972.14		HMGCS1		5	Butanoate metabolism; Valine, leucine and isoleucine degradation; Synthesis and degradation of ketone bodies; Metabolic pathways; Terpenoid backbone biosynthesis	Cholesterol Biosynthesis; Sterol Regulatory Element-Binding Proteins (SREBP) signalling; SREBF and miR33 in cholesterol and lipid homeostasis; Endochondral Ossification	Cholesterol biosynthesis; PPARA activates gene expression; Activation of gene expression by SREBF (SREBP)	17	0.639	0.0206964	0.444234	9.83	4790.3	3151.2	9.65	1.83	High	High	High	High	High	High	1
FALSE	High	Master Protein	Q9UBB4-1	Ataxin-10	OS=Homo sapiens]		22	7	9	7	475	53.5	5.25	27.12	7	cell organization and biogenesis	cytoplasm;cytosol;membrane	protein binding	Pf09759	25814	ENSG00000130638.16		ATXN10		22				0	0.639	0.0308103	0.46361	12.52	1713.9	1095.3	6.9	6.4	High	High	High	High	High	High	1
FALSE	High	Master Protein	Q14134-1	Tripartite motif-containing protein 29	OS=Homo sapiens]		22	10	13	10	588	65.8	7.15	13.54	10	metabolic process;regulation of biological process	cytoplasm	metal ion binding;protein binding	Pf00643, Pf03938	23650	ENSG00000137699.16		TRIM29		11			Interferon gamma signaling	4	0.641	0.0180644	0.433092	3.15	2419.6	1566.7	5.23	4.11	High	High	High	High	High	High	1
FALSE	High	Master Protein	Q92805	Golgin subfamily A member 1	OS=Homo sapiens]		2	1	1	1	767	88.1	5.27	0	1	metabolic process;transport	cytosol;Golgi;membrane	catalytic activity;motor activity;protein binding;transporter activity	Pf01465, Pf01496, Pf01576, Pf04111, Pf04156, Pf04849, Pf07888, Pf08317, Pf10212, Pf12128, Pf13166	2800	ENSG00000136935.13		GOLGA1		9			Retrograde transport at the Trans-Golgi-Network	4	0.641	0.0276526	0.46361	2.92	130.4	78.2	9.42	6.7	High	High	High	High	High	High	1
FALSE	High	Master Protein	Q15038-1	DAZ-associated protein 2	OS=Homo sapiens]		9	1	1	1	168	17.3	7.33	2.5	1		cytoplasm;nucleus	protein binding	Pf11029	9802	ENSG00000183283.15		DAZAP2		12		Exercise-induced Circadian Regulation		1	0.655	0.0343183	0.46361	4.86	28.1	19.9	10.92	7.64	High	High	High	High	High	High	1
FALSE	High	Master Protein	Q6ZS17	RHO family-interacting cell polarization regulator 1	OS=Homo sapiens]		2	2	2	2	1223	132.2	6.28	6.61	2	cell communication;regulation of biological process;response to stimulus	cytoplasm;Golgi;membrane	protein binding	Pf13646	79567	ENSG00000039523.19		FAM65A; RIPOR1		16				0	0.656	0.00783458	0.433092	4.59	57	35.3	17.08	24.18	High	High	High	High	High	High	1
FALSE	High	Master Protein	P98179	RNA-binding protein 3	OS=Homo sapiens]		27	3	11	3	157	17.2	8.91	16.99	3	metabolic process;regulation of biological process	cytoplasm;nucleus	protein binding;RNA binding	Pf00076, Pf13893, Pf14259	5935	ENSG00000102317.17		RBM3		X				0	0.659	0.00544714	0.433092	5.09	2532.8	1670	8.21	17.62	High	High	High	High	High	High	1
FALSE	High	Master Protein	Q9P000-1	COMM domain-containing protein 9	OS=Homo sapiens]		8	2	2	2	198	21.8	5.88	0	2	metabolic process;regulation of biological process;transport	cytosol;extracellular;Golgi;nucleus;organelle lumen	protein binding	Pf07258	29099	ENSG00000110442.11		COMMD9		11			Neutrophil degranulation; Neddylation	6	0.665	0.0115111	0.433092	8.28	924.9	572.9	5.1	11.75	High	High	High	High	High	High	1
FALSE	High	Master Protein	Q13501-1	sequestosome-1	OS=Homo sapiens]		43	12	39	12	440	47.7	5.22	113.37	12	cell communication;cell death;cell differentiation;cell organization and biogenesis;metabolic process;regulation of biological process;response to stimulus;transport	cytoplasm;cytosol;endoplasmic reticulum;endosome;nucleus;vacuole	catalytic activity;metal ion binding;protein binding	Pf00564, Pf00569	8878	ENSG00000161011.19		SQSTM1		5	Osteoclast differentiation	Regulation of toll-like receptor signaling pathway; IL-1 signaling pathway; RANKL/RANK (Receptor activator of NFKB (ligand)) Signaling Pathway; Brain-Derived Neurotrophic Factor (BDNF) signaling pathway; Apoptosis-related network due to altered Notch3 in ovarian cancer; NRF2 pathway; Interleukin-1 Induced Activation of NF-kappa-B; Senescence and Autophagy in Cancer	Interleukin-1 family signaling; NF-kB is activated and signals survival; Signalling by NGF; p75NTR recruits signalling complexes; NRIF signals cell death from the nucleus; Pink/Parkin Mediated Mitophagy	24	0.672	0.0217692	0.444234	13.71	8445.9	5671.7	6.33	3.3	High	High	High	High	High	High	1
FALSE	High	Master Protein	Q99956	Dual specificity protein phosphatase 9	OS=Homo sapiens]		8	2	2	2	384	41.8	6.11	3.72	2	metabolic process;regulation of biological process;response to stimulus	cytoplasm;cytosol;nucleus	catalytic activity;protein binding	Pf00102, Pf00782, Pf03162, Pf14566	1852	ENSG00000130829.17		DUSP9		X	Signaling pathways regulating pluripotency of stem cells; MAPK signaling pathway		Negative regulation of MAPK pathway; RAF-independent MAPK1/3 activation; Interleukin-20 family signaling	12	0.673	0.034019	0.46361	3.08	186	125.2	15.75	7.41	High	High	High	High	High	High	1
FALSE	High	Master Protein	P17980	26S proteasome regulatory subunit 6A	OS=Homo sapiens]		60	23	48	23	439	49.2	5.24	105.18	23	metabolic process;regulation of biological process;response to stimulus;transport	cytoplasm;cytosol;extracellular;membrane;nucleus;organelle lumen;proteasome	catalytic activity;enzyme regulator activity;nucleotide binding;protein binding	Pf00004, Pf01078, Pf05496, Pf07724, Pf07728, Pf13191	5702	ENSG00000165916.8		PSMC3		11	Proteasome; Epstein-Barr virus infection	Proteasome Degradation; Parkin-Ubiquitin Proteasomal System pathway	Regulation of RAS by GAPs; CDT1 association with the CDC6:ORC:origin complex; Downstream TCR signaling; UCH proteinases; NIK-->noncanonical NF-kB signaling; Hh mutants that don't undergo autocatalytic processing are degraded by ERAD; SCF-beta-TrCP mediated degradation of Emi1; Neutrophil degranulation; Cross-presentation of soluble exogenous antigens (endosomes); Separation of Sister Chromatids; …	153	0.677	0.0122492	0.433092	2.18	10692.2	7241.6	0.83	7.34	High	High	High	High	High	High	1
FALSE	High	Master Protein	O75179-1	Ankyrin repeat domain-containing protein 17	OS=Homo sapiens]		4	7	8	2	2603	274.1	6.52	17.12	7	defense response;regulation of biological process;response to stimulus	chromosome;cytoplasm;membrane;nucleus	protein binding;RNA binding	Pf00013, Pf00023, Pf05109, Pf07223, Pf12796, Pf13014, Pf13606, Pf13637, Pf13857	26057	ENSG00000132466.18		ANKRD17		4				0	0.681	0.0278177	0.46361	1.05	114.8	77.6	11.25	4.07	High	High	High	High	High	High	1
FALSE	High	Master Protein	P17844	probable ATP-dependent RNA helicase DDX5	OS=Homo sapiens]		44	27	66	18	614	69.1	8.92	117.11	27	cell differentiation;cell growth;cell organization and biogenesis;metabolic process;regulation of biological process;response to stimulus	cytoplasm;membrane;nucleus;spliceosomal complex	catalytic activity;nucleotide binding;protein binding;RNA binding	Pf00270, Pf00271, Pf08061	1655	ENSG00000108654.13		DDX5		17	Proteoglycans in cancer; Transcriptional misregulation in cancer; Spliceosome		mRNA Splicing - Major Pathway	7	0.693	0.00119732	0.433092	1.85	17871.5	12250.8	3.22	4.59	High	High	High	High	High	High	1
FALSE	High	Master Protein	Q9BRK5-1	45 kDa calcium-binding protein	OS=Homo sapiens]		9	3	5	3	362	41.8	4.86	10.8	3	cell differentiation;response to stimulus;transport	cytoplasm;endosome;Golgi;membrane;organelle lumen	metal ion binding;protein binding	Pf13499	51150	ENSG00000078808.16		SDF4		1				0	0.7	0.0189679	0.43431	4.13	2359	1670.2	4.7	3.41	High	High	High	High	High	High	1
FALSE	High	Master Protein	Q9NPD8	Ubiquitin-conjugating enzyme E2 T	OS=Homo sapiens]		23	4	4	4	197	22.5	7.99	8.7	4	metabolic process;response to stimulus	cytoplasm;nucleus	catalytic activity;nucleotide binding;protein binding	Pf00179, Pf14461	29089	ENSG00000077152.9		UBE2T		1	Fanconi anemia pathway	Gastric cancer network 2	Synthesis of active ubiquitin: roles of E1 and E2 enzymes; Fanconi Anemia Pathway	8	0.704	0.0184921	0.433092	8.37	489.5	350	8.27	7.06	High	High	High	High	High	High	1
FALSE	High	Master Protein	P56199	Integrin alpha-1	OS=Homo sapiens]		1	1	1	1	1179	130.8	6.29	0	1	cell organization and biogenesis;cellular component movement;regulation of biological process;response to stimulus	cell surface;membrane	metal ion binding;protein binding	Pf00092, Pf01839, Pf08441, Pf13517, Pf13519, Pf14312	3672	ENSG00000213949.8		ITGA1		5	Regulation of actin cytoskeleton; Arrhythmogenic right ventricular cardiomyopathy (ARVC); Hypertrophic cardiomyopathy (HCM); Hematopoietic cell lineage; ECM-receptor interaction; Focal adhesion; Dilated cardiomyopathy; PI3K-Akt signaling pathway	Integrin-mediated Cell Adhesion; Arrhythmogenic Right Ventricular Cardiomyopathy; miRNA targets in ECM and membrane receptors; Signaling of Hepatocyte Growth Factor Receptor; NOTCH1 regulation of human endothelial cell calcification; Regulation of Actin Cytoskeleton	CHL1 interactions; Other semaphorin interactions; Integrin cell surface interactions; Smooth Muscle Contraction; Laminin interactions; Platelet Adhesion to exposed collagen	27	0.705	0.040727	0.46361	1.45	454.5	325.9	9.51	2.41	High	High	High	High	High	High	1
FALSE	High	Master Protein	Q9UKB1-1	F-box/WD repeat-containing protein 11	OS=Homo sapiens]		2	1	1	1	542	62.1	7.12	4.69	1	metabolic process;regulation of biological process;response to stimulus	cytoplasm;cytosol;nucleus	catalytic activity;protein binding	Pf00400, Pf00646, Pf08801, Pf12125, Pf12937	23291	ENSG00000072803.17		FBXW11		5	Wnt signaling pathway; Hedgehog signaling pathway; Ubiquitin mediated proteolysis; Circadian rhythm; Oocyte meiosis; Hippo signaling pathway; Shigellosis	TNF alpha Signaling Pathway; VEGFA-VEGFR2 Signaling Pathway	Downstream TCR signaling; Regulation of PLK1 Activity at G2/M Transition; NIK-->noncanonical NF-kB signaling; MAP3K8 (TPL2)-dependent MAPK1/3 activation; Antigen processing: Ubiquitination & Proteasome degradation; FCERI mediated NF-kB activation; Neddylation; Activated TLR4 signalling; Interleukin-1 family signaling; Activation of NF-kappaB in B cells; Dectin-1 mediated noncanonical NF-kB signal…	57	0.716	0.0389849	0.46361	10.25	62.7	47.6	7.32	6.96	High	High	High	High	High	High	1
FALSE	High	Master Protein	Q96G74-1	OTU domain-containing protein 5	OS=Homo sapiens]		6	2	2	2	571	60.6	6.54	8.97	2	metabolic process;regulation of biological process;response to stimulus	cytosol	catalytic activity	Pf02338	55593	ENSG00000068308.13		OTUD5		X	RIG-I-like receptor signaling pathway	Regulation of toll-like receptor signaling pathway; Gastric cancer network 2; RIG-I-like Receptor Signaling	Ovarian tumor domain proteases; Negative regulators of DDX58/IFIH1 signaling	12	0.726	0.0219341	0.444234	7.91	450.6	312.8	9.8	6.75	High	High	High	High	High	High	1
FALSE	High	Master Protein	O43617-1	Trafficking protein particle complex subunit 3	OS=Homo sapiens]		4	1	1	1	180	20.3	4.96	0	1	cell organization and biogenesis;transport	cytosol;endoplasmic reticulum;Golgi;membrane	protein binding	Pf04051	27095	ENSG00000054116.11		TRAPPC3		1			RAB GEFs exchange GTP for GDP on RABs; COPII (Coat Protein 2) Mediated Vesicle Transport	10	0.73	0.0109637	0.433092	9.07	921.2	682.7	0.94	6.4	High	High	High	High	High	High	1
FALSE	High	Master Protein	P31040	Succinate dehydrogenase	ubiquinone] flavoprotein subunit, mitochondrial	OS=Homo sapiens]	48	21	57	21	664	72.6	7.39	148.88	21	metabolic process;transport	membrane;mitochondrion	catalytic activity;nucleotide binding;protein binding	Pf00890, Pf02910	6389	ENSG00000073578.16		SDHA		5	Oxidative phosphorylation; Huntington's disease; Metabolic pathways; Alzheimer's disease; Carbon metabolism; Non-alcoholic fatty liver disease (NAFLD); Parkinson's disease; Citrate cycle (TCA cycle)	Electron Transport Chain; TCA Cycle and Deficiency of Pyruvate Dehydrogenase complex (PDHc); Amino Acid metabolism; TCA Cycle	Respiratory electron transport; Citric acid cycle (TCA cycle)	18	0.73	0.0527776	0.479125	5.16	17300.5	12634.3	6.3	4.58	High	High	High	High	High	High	1
FALSE	High	Master Protein	P31689-1	DnaJ homolog subfamily A member 1	OS=Homo sapiens]		22	9	18	9	397	44.8	7.08	35.06	9	cellular component movement;metabolic process;regulation of biological process;response to stimulus;transport	cytoplasm;cytoskeleton;cytosol;endoplasmic reticulum;membrane;mitochondrion;nucleus	enzyme regulator activity;metal ion binding;nucleotide binding;protein binding	Pf00226, Pf00684, Pf01556	3301	ENSG00000086061.15		DNAJA1		9	Protein processing in endoplasmic reticulum	Exercise-induced Circadian Regulation	HSP90 chaperone cycle for steroid hormone receptors (SHR)	5	0.732	0.0311696	0.46361	0.71	7228	5331.7	2.23	6.67	High	High	High	High	High	High	1
FALSE	High	Master Protein	Q9Y314	nitric oxide synthase-interacting protein	OS=Homo sapiens]		19	5	8	5	301	33.2	8.82	12.83	5	development;metabolic process;regulation of biological process	cytoplasm;cytosol;membrane;nucleus	catalytic activity;metal ion binding;protein binding;RNA binding	Pf04564, Pf04641, Pf11789	51070	ENSG00000142546.13		NOSIP		19			NOSIP mediated eNOS trafficking	4	0.736	0.0513264	0.479125	2.69	3649.8	2873.6	5.88	7.26	High	High	High	High	High	High	1
FALSE	High	Master Protein	Q8N129	Protein canopy homolog 4	OS=Homo sapiens]		4	1	3	1	248	28.3	4.64	5.7	1	regulation of biological process	extracellular	protein binding	Pf11938	245812	ENSG00000166997.7		CNPY4		7				0	0.76	0.0374321	0.46361	13.45	531.4	422.1	16.41	17.57	High	High	High	High	High	High	1
FALSE	High	Master Protein	P36873-1	serine/threonine-protein phosphatase PP1-gamma catalytic subunit	OS=Homo sapiens]		42	13	26	1	323	37	6.54	81.61	13	cell differentiation;cell division;cell organization and biogenesis;metabolic process;regulation of biological process;response to stimulus	chromosome;cytoplasm;cytosol;membrane;mitochondrion;nucleus	catalytic activity;metal ion binding;protein binding;RNA binding	Pf00149	5501	ENSG00000186298.11		PPP1CC		12	Vascular smooth muscle contraction; Regulation of actin cytoskeleton; Adrenergic signaling in cardiomyocytes; Platelet activation; Hippo signaling pathway; Alcoholism; Insulin signaling pathway; Oocyte meiosis; Proteoglycans in cancer; Long-term potentiation; Insulin resistance; cGMP-PKG signaling pathway; Inflammatory mediator regulation of TRP channels; mRNA surveillance pathway; Focal adhesion…	Common Pathways Underlying Drug Addiction	Triglyceride catabolism; Amplification of signal from unattached kinetochores via a MAD2 inhibitory signal; Separation of Sister Chromatids; Downregulation of TGF-beta receptor signaling; Resolution of Sister Chromatid Cohesion; RHO GTPases Activate Formins; Circadian Clock	46	0.761	0.00481111	0.433092	0.02	804.5	632.1	8.32	7.77	High	High	High	High	High	High	1
FALSE	High	Master Protein	P15924-1	Desmoplakin	OS=Homo sapiens]		12	27	35	27	2871	331.6	6.81	50.64	27	cell death;cell differentiation;cell organization and biogenesis;metabolic process;regulation of biological process;response to stimulus;transport	cytoplasm;cytoskeleton;membrane;nucleus	catalytic activity;motor activity;protein binding;RNA binding;structural molecule activity	Pf00038, Pf00681, Pf01540, Pf01576, Pf02463, Pf04111, Pf04156, Pf05483, Pf05557, Pf05622, Pf06008, Pf06160, Pf06637, Pf07888, Pf10174, Pf12072, Pf12128, Pf13166	1832	ENSG00000096696.13		DSP		6	Arrhythmogenic right ventricular cardiomyopathy (ARVC)	Arrhythmogenic Right Ventricular Cardiomyopathy; Lung fibrosis	Apoptotic cleavage of cell adhesion proteins; Formation of the cornified envelope; Neutrophil degranulation	14	0.762	0.0155009	0.433092	1.42	3185.7	2369.1	4.51	2.34	High	High	High	High	High	High	1	Methyl [K2381; K2393]; Phospho [S2383(50); Y2392(50)]
FALSE	High	Master Protein	Q9BW92	Threonine--tRNA ligase, mitochondrial	OS=Homo sapiens]		4	3	4	3	718	81	7.3	9.32	3	metabolic process;regulation of biological process	cytoplasm;mitochondrion;organelle lumen	catalytic activity;nucleotide binding;protein binding	Pf00587, Pf02824, Pf03129, Pf07973	80222	ENSG00000143374.16		TARS2		1	Aminoacyl-tRNA biosynthesis		Mitochondrial tRNA aminoacylation	5	0.764	0.015629	0.433092	3.07	958.5	734.5	2.46	6.04	High	High	High	High	High	High	1
FALSE	High	Master Protein	Q00266	S-adenosylmethionine synthase isoform type-1	OS=Homo sapiens]		8	3	6	1	395	43.6	6.29	5.04	3	cell organization and biogenesis;metabolic process	cytosol	catalytic activity;metal ion binding;nucleotide binding;protein binding	Pf00438, Pf02772, Pf02773	4143	ENSG00000151224.12		MAT1A		10	Metabolic pathways; Cysteine and methionine metabolism; Biosynthesis of amino acids	Vitamin B12 Metabolism; Folate Metabolism; One Carbon Metabolism; Trans-sulfuration and one carbon metabolism; One carbon metabolism and related pathways; Methylation Pathways	Metabolism of ingested SeMet, Sec, MeSec into H2Se; Sulfur amino acid metabolism; Methylation; Defective MAT1A causes Methionine adenosyltransferase deficiency (MATD)	21	0.765	0.00516322	0.433092	3.64	1006.2	748.8	7.13	6.72	High	High	High	High	High	High	1	Methyl [R264]
FALSE	High	Master Protein	Q9NRX2	39S ribosomal protein L17, mitochondrial	OS=Homo sapiens]		22	3	3	3	175	20	10.11	7.17	3	cell organization and biogenesis;metabolic process	membrane;mitochondrion;ribosome	protein binding;structural molecule activity	Pf01196	63875	ENSG00000158042.8		MRPL17		11	Ribosome		Mitochondrial translation initiation; Mitochondrial translation elongation; Mitochondrial translation termination	7	0.77	0.0422641	0.46361	8.79	201.3	147.7	7.41	9.8	High	High	High	High	High	High	1
FALSE	High	Master Protein	P78347	General transcription factor II-I	OS=Homo sapiens]		6	5	6	5	998	112.3	6.39	5.99	5	cellular homeostasis;metabolic process;regulation of biological process;response to stimulus	cytoplasm;membrane;nucleus	DNA binding;protein binding	Pf02946	2969	ENSG00000263001.5		GTF2I		7	cGMP-PKG signaling pathway; Basal transcription factors; Herpes simplex infection	B Cell Receptor Signaling Pathway		4	0.772	0.0370301	0.46361	14.66	204.8	143.8	15.16	24.55	High	High	High	High	High	High	1
FALSE	High	Master Protein	P61024	cyclin-dependent kinases regulatory subunit 1	OS=Homo sapiens]		41	3	5	3	79	9.7	8.94	10.32	3	cell division;metabolic process;regulation of biological process		catalytic activity;enzyme regulator activity;protein binding	Pf01111	1163	ENSG00000173207.12		CKS1B		1	Small cell lung cancer; Pathways in cancer		Cyclin D associated events in G1; SCF(Skp2)-mediated degradation of p27/p21	12	0.774	0.00461186	0.433092	5.6	1304.7	1009.6	13.68	21.81	High	High	High	High	High	High	1
FALSE	High	Master Protein	P24928	DNA-directed RNA polymerase II subunit RPB1	OS=Homo sapiens]		4	5	7	5	1970	217	7.37	12.22	5	metabolic process;regulation of biological process;response to stimulus	cytoplasm;nucleus	catalytic activity;DNA binding;metal ion binding;protein binding;RNA binding	Pf00623, Pf04983, Pf04990, Pf04992, Pf04997, Pf04998, Pf05000	5430			POLR2A		17	RNA polymerase; Epstein-Barr virus infection; Metabolic pathways; Huntington's disease; Pyrimidine metabolism; Purine metabolism; Herpes simplex infection	Eukaryotic Transcription Initiation; mRNA Processing	Signaling by FGFR2 IIIa TM; RNA polymerase II transcribes snRNA genes; Abortive elongation of HIV-1 transcript in the absence of Tat; Tat-mediated HIV elongation arrest and recovery; Activation of anterior HOX genes in hindbrain development during early embryogenesis; Formation of HIV-1 elongation complex containing HIV-1 Tat; MicroRNA (miRNA) biogenesis; Formation of the HIV-1 Early Elongation C…	77	0.778	0.0358816	0.46361	2.22	2337.2	1859.5	2.06	6.15	High	High	High	High	High	High	1
FALSE	High	Master Protein	Q16186	Proteasomal ubiquitin receptor ADRM1	OS=Homo sapiens]		13	6	16	6	407	42.1	5.07	16.38	6	cell organization and biogenesis;metabolic process;regulation of biological process	cytoplasm;cytosol;membrane;nucleus;proteasome	enzyme regulator activity;protein binding	Pf04683	11047	ENSG00000130706.12		ADRM1		20			UCH proteinases; Ub-specific processing proteases	5	0.78	0.00753387	0.433092	5.86	1741.1	1413.9	8.85	10.21	High	High	High	High	High	High	1
FALSE	High	Master Protein	Q9BXS5-1	AP-1 complex subunit mu-1	OS=Homo sapiens]		10	3	4	3	423	48.6	7.3	11.5	3	cell organization and biogenesis;regulation of biological process;transport	cytosol;Golgi;membrane	protein binding	Pf00928	8907	ENSG00000072958.8		AP1M1		19	Lysosome		Neutrophil degranulation; Nef mediated downregulation of MHC class I complex cell surface expression; MHC class II antigen presentation; Golgi Associated Vesicle Biogenesis; Lysosome Vesicle Biogenesis	19	0.78	0.0174323	0.433092	1.15	1230.8	952.7	8.14	4.83	High	High	High	High	High	High	1
FALSE	High	Master Protein	Q96S66	chloride channel CLIC-like protein 1	OS=Homo sapiens]		6	2	4	2	551	62	5.55	0	2	transport	endoplasmic reticulum;Golgi;membrane;nucleus	transporter activity	Pf05934	23155	ENSG00000121940.15		CLCC1		1				0	0.783	0.0124954	0.433092	7.47	313.2	258.3	3.71	7.61	High	High	High	High	High	High	1
FALSE	High	Master Protein	P12270	Nucleoprotein TPR	OS=Homo sapiens]		23	43	57	43	2363	267.1	5.02	114.02	43	cell division;cell organization and biogenesis;metabolic process;regulation of biological process;response to stimulus;transport	chromosome;cytoplasm;cytoskeleton;membrane;nucleus	catalytic activity;motor activity;protein binding;RNA binding;structural molecule activity;transporter activity	Pf00038, Pf01496, Pf01576, Pf02463, Pf03961, Pf04111, Pf05911, Pf07888, Pf07926, Pf09726, Pf12128, Pf13166, Pf13514	7175	ENSG00000047410.13		TPR		1	RNA transport; Thyroid cancer; Pathways in cancer		Rev-mediated nuclear export of HIV RNA; ISG15 antiviral mechanism; NEP/NS2 Interacts with the Cellular Export Machinery; tRNA processing in the nucleus; Transcriptional regulation by small RNAs; Defective TPR may confer susceptibility towards thyroid papillary carcinoma (TPC); Nuclear Pore Complex (NPC) Disassembly; Regulation of Glucokinase by Glucokinase Regulatory Protein; Vpr-mediated nuclear…	69	0.785	0.045024	0.478123	6.78	12310.4	9804.6	5.46	3.24	High	High	High	High	High	High	1
FALSE	High	Master Protein	O75534	cold shock domain-containing protein E1	OS=Homo sapiens]		30	19	34	19	798	88.8	6.25	75.88	19	metabolic process;regulation of biological process	cytoplasm;cytosol;Golgi;membrane	DNA binding;protein binding;RNA binding	Pf00313, Pf12901	7812	ENSG00000009307.15		CSDE1		1				0	0.786	0.0356449	0.46361	7.42	7353.2	5821.4	1.39	6.87	High	High	High	High	High	High	1
FALSE	High	Master Protein	P04792	Heat shock protein beta-1	OS=Homo sapiens]		94	19	92	19	205	22.8	6.4	218.26	19	cellular component movement;metabolic process;regulation of biological process;response to stimulus	cytoplasm;cytoskeleton;cytosol;membrane;nucleus;proteasome	enzyme regulator activity;protein binding;RNA binding	Pf00011	3315	ENSG00000106211.8		HSPB1		7	MAPK signaling pathway; Amoebiasis; Epstein-Barr virus infection; VEGF signaling pathway	Apoptosis-related network due to altered Notch3 in ovarian cancer; Fas Ligand (FasL) pathway and Stress induction of Heat Shock Proteins (HSP) regulation; MAPK Signaling Pathway; ATM Signaling Network in Development and Disease; VEGFA-VEGFR2 Signaling Pathway; p38 MAPK Signaling Pathway	AUF1 (hnRNP D0) binds and destabilizes mRNA; VEGFA-VEGFR2 Pathway; MAPK6/MAPK4 signaling	19	0.788	0.0415148	0.46361	11.99	35642	27182.9	3.58	7.88	High	High	High	High	High	High	1	Phospho [S82(99.6)]
FALSE	High	Master Protein	Q9UPN4	centrosomal protein of 131 kDa	OS=Homo sapiens]		2	2	2	2	1083	122.1	8.69	0	2	cell differentiation;cell organization and biogenesis;cellular component movement;development;metabolic process;regulation of biological process;transport	cytoplasm;cytoskeleton;cytosol	catalytic activity;motor activity;protein binding	Pf01576, Pf02463, Pf04111, Pf04156, Pf09726, Pf12128	22994	ENSG00000141577.13		AZI1; CEP131		17			Regulation of PLK1 Activity at G2/M Transition; AURKA Activation by TPX2; Anchoring of the basal body to the plasma membrane; Recruitment of NuMA to mitotic centrosomes; Loss of Nlp from mitotic centrosomes; Recruitment of mitotic centrosome proteins and complexes	16	0.793	9.25092e-05	0.163043	0.62	485.7	387.4	1.29	1.61	High	High	High	High	High	High	1
FALSE	High	Master Protein	Q08380	Galectin-3-binding protein	OS=Homo sapiens]		14	5	10	5	585	65.3	5.27	27.53	5	defense response;regulation of biological process;response to stimulus;transport	extracellular;membrane;organelle lumen	protein binding;receptor activity	Pf00530, Pf07707	3959	ENSG00000108679.12		LGALS3BP		17			Platelet degranulation	4	0.794	0.0183835	0.433092	3.63	2008.2	1517	3.14	5.75	High	High	High	High	High	High	1
FALSE	High	Master Protein	Q9C0H2-1	Protein tweety homolog 3	OS=Homo sapiens]		3	1	1	1	523	57.5	5.39	1.94	1	transport	membrane	transporter activity	Pf04906	80727	ENSG00000136295.14		TTYH3		7			Stimuli-sensing channels	3	0.796	0.012435	0.433092	2.27	323.9	268.9	9.24	9.89	High	High	High	High	High	High	1
FALSE	High	Master Protein	P11142-1	Heat shock cognate 71 kDa protein	OS=Homo sapiens]		70	52	370	41	646	70.9	5.52	846.52	52	cell communication;cell organization and biogenesis;metabolic process;regulation of biological process;response to stimulus;transport	cytoplasm;cytosol;endosome;extracellular;membrane;nucleus;organelle lumen;spliceosomal complex	catalytic activity;nucleotide binding;protein binding;RNA binding	Pf00012, Pf02463, Pf06723	3312	ENSG00000109971.13		HSPA8		11	Protein processing in endoplasmic reticulum; Epstein-Barr virus infection; Legionellosis; Measles; MAPK signaling pathway; Longevity regulating pathway - multiple species; Estrogen signaling pathway; Toxoplasmosis; Spliceosome; Endocytosis; Antigen processing and presentation; Influenza A	Parkin-Ubiquitin Proteasomal System pathway; MAPK Signaling Pathway; Exercise-induced Circadian Regulation	Protein methylation; Clathrin-mediated endocytosis; Regulation of HSF1-mediated heat shock response; Golgi Associated Vesicle Biogenesis; GABA synthesis, release, reuptake and degradation; Lysosome Vesicle Biogenesis; CHL1 interactions; AUF1 (hnRNP D0) binds and destabilizes mRNA; Attenuation phase; Neutrophil degranulation; mRNA Splicing - Major Pathway; Interleukin-4 and 13 signaling; HSP90 cha…	52	0.797	0.0250688	0.46361	5.65	131847	100565	3.06	6.55	High	High	High	High	High	High	1	Methyl [K561; K567; K569]
FALSE	High	Master Protein	Q5SRE5	Nucleoporin NUP188 homolog	OS=Homo sapiens]		3	3	7	3	1749	195.9	6.73	18.78	3	cell organization and biogenesis;cellular component movement;metabolic process;regulation of biological process;transport	membrane;nucleus	structural molecule activity	Pf10487, Pf11894	23511	ENSG00000095319.14		NUP188		9	RNA transport		Rev-mediated nuclear export of HIV RNA; ISG15 antiviral mechanism; NEP/NS2 Interacts with the Cellular Export Machinery; tRNA processing in the nucleus; Transcriptional regulation by small RNAs; Nuclear Pore Complex (NPC) Disassembly; Regulation of Glucokinase by Glucokinase Regulatory Protein; Vpr-mediated nuclear import of PICs; Regulation of HSF1-mediated heat shock response; snRNP Assembly; S…	64	0.798	0.04229	0.46361	7.68	698.3	557.2	5.83	2.97	High	High	High	High	High	High	1
FALSE	High	Master Protein	P08174-1	Complement decay-accelerating factor	OS=Homo sapiens]		38	12	32	12	381	41.4	7.59	51.03	12	cellular homeostasis;defense response;metabolic process;regulation of biological process;response to stimulus;transport	cell surface;extracellular;membrane	protein binding;receptor activity	Pf00084	1604	ENSG00000196352.14		CD55		1	Complement and coagulation cascades; Viral myocarditis; Hematopoietic cell lineage	Allograft Rejection; Complement Activation; Complement and Coagulation Cascades	Regulation of Complement cascade; Neutrophil degranulation; Class B/2 (Secretin family receptors); COPI-mediated anterograde transport	23	0.801	0.00307498	0.433092	2.12	11368.4	8881	2.15	3.63	High	High	High	High	High	High	1
FALSE	Medium	Master Protein	Q9Y666	Solute carrier family 12 member 7	OS=Homo sapiens]		1	1	1	1	1083	119	6.71	0	1	cell communication;cellular homeostasis;transport	membrane	catalytic activity;protein binding;transporter activity	Pf00324, Pf12474, Pf13520	10723	ENSG00000113504.20		SLC12A7		5	Collecting duct acid secretion		Cation-coupled Chloride cotransporters	5	0.801	0.0161622	0.433092	2.25	766.6	614.4	11.58	9.24	High	High	High	High	High	High	1
FALSE	High	Master Protein	P62333	26S proteasome regulatory subunit 10B	OS=Homo sapiens]		58	18	40	18	389	44.1	7.49	98.98	18	cell organization and biogenesis;metabolic process;regulation of biological process;response to stimulus;transport	cytoplasm;cytosol;membrane;nucleus;proteasome	catalytic activity;nucleotide binding;protein binding;RNA binding	Pf00004, Pf00910, Pf01078, Pf05496, Pf07724, Pf07726, Pf07728, Pf13191, Pf13207, Pf13401	5706	ENSG00000100519.11		PSMC6		14	Epstein-Barr virus infection; Proteasome	Proteasome Degradation; Parkin-Ubiquitin Proteasomal System pathway	Regulation of RAS by GAPs; CDT1 association with the CDC6:ORC:origin complex; Downstream TCR signaling; UCH proteinases; NIK-->noncanonical NF-kB signaling; Hh mutants that don't undergo autocatalytic processing are degraded by ERAD; SCF-beta-TrCP mediated degradation of Emi1; Cross-presentation of soluble exogenous antigens (endosomes); Separation of Sister Chromatids; Vpu mediated degradation o…	152	0.803	0.0317938	0.46361	6.07	11748.8	9265.1	3.68	4.93	High	High	High	High	High	High	1
FALSE	High	Master Protein	P23743-1	diacylglycerol kinase alpha	OS=Homo sapiens]		3	2	2	2	735	82.6	6.73	2.19	2	metabolic process;regulation of biological process;response to stimulus	cytosol;membrane	catalytic activity;metal ion binding;nucleotide binding	Pf00130, Pf00609, Pf00781, Pf13499, Pf14513	1606	ENSG00000065357.19		DGKA		12	Glycerophospholipid metabolism; Glycerolipid metabolism; Choline metabolism in cancer; Phospholipase D signaling pathway; Metabolic pathways; Phosphatidylinositol signaling system		Effects of PIP2 hydrolysis; Gastrin-CREB signalling pathway via PKC and MAPK	14	0.804	0.0210737	0.444234	6.27	199.4	153.7	15.93	17.67	High	High	High	High	High	High	1
FALSE	High	Master Protein	P62191	26S proteasome regulatory subunit 4	OS=Homo sapiens]		26	11	19	11	440	49.2	6.21	38.46	11	metabolic process;regulation of biological process;response to stimulus;transport	cytoplasm;cytosol;membrane;nucleus;proteasome	catalytic activity;nucleotide binding;protein binding;RNA binding	Pf00004, Pf00910, Pf01078, Pf05496, Pf05673, Pf05729, Pf07724, Pf07726, Pf07728, Pf13191, Pf13401	5700	ENSG00000100764.13		PSMC1		14	Epstein-Barr virus infection; Viral carcinogenesis; Proteasome	Proteasome Degradation; Parkin-Ubiquitin Proteasomal System pathway	Regulation of RAS by GAPs; CDT1 association with the CDC6:ORC:origin complex; Downstream TCR signaling; UCH proteinases; NIK-->noncanonical NF-kB signaling; Hh mutants that don't undergo autocatalytic processing are degraded by ERAD; SCF-beta-TrCP mediated degradation of Emi1; Cross-presentation of soluble exogenous antigens (endosomes); Separation of Sister Chromatids; Vpu mediated degradation o…	155	0.807	0.0292853	0.46361	1.69	3507.1	2876.1	5.92	1.92	High	High	High	High	High	High	1
FALSE	High	Master Protein	Q9HD15	Steroid receptor RNA activator 1	OS=Homo sapiens]		14	2	2	2	236	25.7	7.03	7.61	2	cell death;cell differentiation;cell proliferation;metabolic process;regulation of biological process	cytoplasm;cytoskeleton;cytosol;membrane;nucleus	protein binding;RNA binding	Pf07304	10011	ENSG00000213523.10		SRA1		5				0	0.809	0.00754582	0.433092	3.11	385.4	313	3.97	4.73	High	High	High	High	High	High	1
FALSE	High	Master Protein	O14561	Acyl carrier protein, mitochondrial	OS=Homo sapiens]		16	2	4	2	156	17.4	4.93	5.77	2	cell organization and biogenesis;metabolic process;transport	cytosol;membrane;mitochondrion;organelle lumen	catalytic activity;metal ion binding;protein binding;transporter activity	Pf00550	4706	ENSG00000004779.9		NDUFAB1		16	Huntington's disease; Alzheimer's disease; Metabolic pathways; Oxidative phosphorylation; Parkinson's disease; Non-alcoholic fatty liver disease (NAFLD)	Electron Transport Chain; Oxidative phosphorylation	Mitochondrial Fatty Acid Beta-Oxidation; Glyoxylate metabolism and glycine degradation; Complex I biogenesis	18	0.809	0.0121227	0.433092	0.3	2050.8	1758.7	11.76	12.67	High	High	High	High	High	High	1
FALSE	High	Master Protein	P35998	26S proteasome regulatory subunit 7	OS=Homo sapiens]		35	14	32	14	433	48.6	5.95	72.84	14	cell differentiation;metabolic process;regulation of biological process;response to stimulus;transport	cytoplasm;cytosol;extracellular;membrane;nucleus;organelle lumen;proteasome	catalytic activity;nucleotide binding;protein binding	Pf00004, Pf00158, Pf07724, Pf07726, Pf07728, Pf13191, Pf13401	5701	ENSG00000161057.11		PSMC2		7	Proteasome; Epstein-Barr virus infection	Proteasome Degradation; Parkin-Ubiquitin Proteasomal System pathway	Regulation of RAS by GAPs; CDT1 association with the CDC6:ORC:origin complex; Downstream TCR signaling; UCH proteinases; NIK-->noncanonical NF-kB signaling; Hh mutants that don't undergo autocatalytic processing are degraded by ERAD; SCF-beta-TrCP mediated degradation of Emi1; Neutrophil degranulation; Cross-presentation of soluble exogenous antigens (endosomes); Separation of Sister Chromatids; …	153	0.81	0.00968006	0.433092	4.29	8341.6	6919.6	2.6	5.09	High	High	High	High	High	High	1
FALSE	High	Master Protein	Q8WXF1	Paraspeckle component 1	OS=Homo sapiens]		22	9	10	8	523	58.7	6.67	21.22	9	defense response;metabolic process;regulation of biological process;response to stimulus	cytoplasm;nucleus	DNA binding;protein binding;RNA binding	Pf00076, Pf08075, Pf13893, Pf14259	55269	ENSG00000121390.18		PSPC1		13				0	0.812	0.0301208	0.46361	7.68	1835	1380	6.22	11.28	High	High	High	High	High	High	1
FALSE	High	Master Protein	P35613	Basigin	OS=Homo sapiens]		19	7	44	7	385	42.2	5.66	130.53	7	cell organization and biogenesis;cellular component movement;metabolic process;regulation of biological process;response to stimulus;transport	membrane;mitochondrion	protein binding;transporter activity	Pf00047, Pf07679, Pf13895, Pf13927	682	ENSG00000172270.18		BSG		19		Matrix Metalloproteinases	Integrin cell surface interactions; Proton-coupled monocarboxylate transport; Basigin interactions; Degradation of the extracellular matrix; Pyruvate metabolism	15	0.812	0.0334625	0.46361	6.95	15826.3	12846.5	5	1.97	High	High	High	High	High	High	1
FALSE	High	Master Protein	Q14011	Cold-inducible RNA-binding protein	OS=Homo sapiens]		42	5	9	5	172	18.6	9.51	25.69	5	cell organization and biogenesis;regulation of biological process;response to stimulus	cytoplasm;nucleus	protein binding;RNA binding;translation regulator activity	Pf00076, Pf13893, Pf14259	1153	ENSG00000099622.13		CIRBP		19				0	0.814	0.00434813	0.433092	2.78	2171.2	1768	3.01	6.47	High	High	High	High	High	High	1
FALSE	High	Master Protein	Q5JWF2-1	Guanine nucleotide-binding protein G(S) subunit alpha isoforms XLas	OS=Homo sapiens]		5	4	5	3	1037	111	5.03	10.36	4	metabolic process;regulation of biological process;response to stimulus	cytosol;membrane	catalytic activity;metal ion binding;nucleotide binding;protein binding;signal transducer activity	Pf00025, Pf00503, Pf08477	2778	ENSG00000087460.24		GNAS		20		Human Thyroid Stimulating Hormone (TSH) signaling pathway; Endothelin Pathways; Corticotropin-releasing hormone signaling pathway; Common Pathways Underlying Drug Addiction; Myometrial Relaxation and Contraction Pathways; G Protein Signaling Pathways; Calcium Regulation in the Cardiac Cell; Estrogen signaling pathway; Serotonin Receptor 4/6/7 and NR3C Signaling	G alpha (z) signalling events; Prostacyclin signalling through prostacyclin receptor; PKA activation in glucagon signalling; G alpha (s) signalling events; Glucagon-type ligand receptors; G alpha (i) signalling events; Glucagon-like Peptide-1 (GLP1) regulates insulin secretion; Hedgehog 'off' state; Vasopressin regulates renal water homeostasis via Aquaporins	32	0.815	0.0163646	0.433092	2.83	798.2	643.6	7.64	6.02	High	High	High	High	High	High	1
FALSE	High	Master Protein	Q9UJU6-3	Isoform 3 of Drebrin-like protein	OS=Homo sapiens]		30	9	14	1	439	49	5.05	35.73	9	cell organization and biogenesis;regulation of biological process;response to stimulus;transport	cytoplasm;cytosol;endosome;extracellular;membrane;organelle lumen	enzyme regulator activity;protein binding	Pf00018, Pf00241, Pf07653, Pf14604	28988	ENSG00000136279.20		DBNL		7		T-Cell antigen Receptor (TCR) Signaling Pathway		1	0.818	0.0248969	0.46361	4.7	76.7	60.8	8.96	5.72	High	High	High	High	High	High	1
FALSE	High	Master Protein	Q9UMY1-1	Nucleolar protein 7	OS=Homo sapiens]		11	2	3	2	257	29.4	9.67	5.87	2		mitochondrion;nucleus	RNA binding	Pf08157	51406	ENSG00000225921.6		NOL7		6				0	0.819	0.0152403	0.433092	6.65	179.8	142.2	10.16	15.76	High	High	High	High	High	High	1
FALSE	High	Master Protein	Q16777	Histone H2A type 2-C	OS=Homo sapiens]		35	5	10	1	129	14	10.9	11.14	5	regulation of biological process	chromosome;nucleus	DNA binding;protein binding	Pf00125, Pf00808	8338	ENSG00000184260.5		HIST2H2AC		1	Systemic lupus erythematosus; Alcoholism		SIRT1 negatively regulates rRNA expression; UCH proteinases; RMTs methylate histone arginines; Activation of anterior HOX genes in hindbrain development during early embryogenesis; NoRC negatively regulates rRNA expression; Meiotic synapsis; Transcriptional regulation by small RNAs; Meiotic recombination; PRC2 methylates histones and DNA; HDACs deacetylate histones; Formation of the beta-catenin:…	66	0.819	0.0344386	0.46361	2.96	166.6	139.8	12.71	10.91	High	High	High	High	High	High	1
FALSE	High	Master Protein	Q9HCC0-1	Methylcrotonoyl-CoA carboxylase beta chain, mitochondrial	OS=Homo sapiens]		26	11	16	11	563	61.3	7.68	44.7	11	cell organization and biogenesis;metabolic process	cytosol;mitochondrion;organelle lumen	catalytic activity;nucleotide binding;protein binding	Pf01039	64087	ENSG00000131844.15		MCCC2		5	Metabolic pathways; Valine, leucine and isoleucine degradation		Branched-chain amino acid catabolism; Biotin transport and metabolism; Defective HLCS causes multiple carboxylase deficiency	13	0.819	0.0464742	0.479125	6.12	3127.2	2525.5	8.54	2.65	High	High	High	High	High	High	1
FALSE	High	Master Protein	Q9H9E3-1	Conserved oligomeric Golgi complex subunit 4	OS=Homo sapiens]		2	1	1	1	785	89	5.19	4.62	1	cell organization and biogenesis;transport	endoplasmic reticulum;Golgi;membrane	protein binding	Pf08318	25839			COG4		16			COPI-mediated anterograde transport; Intra-Golgi traffic; Retrograde transport at the Trans-Golgi-Network	11	0.82	0.0139843	0.433092	0.22	343.9	281.4	11.41	9.53	High	High	High	High	High	High	1
FALSE	High	Master Protein	P49792	E3 SUMO-protein ligase RanBP2	OS=Homo sapiens]		20	49	69	47	3224	358	6.2	112.21	49	cell organization and biogenesis;metabolic process;regulation of biological process;response to stimulus;transport	cytoplasm;cytosol;membrane;mitochondrion;nucleus	catalytic activity;enzyme regulator activity;metal ion binding;protein binding;RNA binding	Pf00160, Pf00515, Pf00638, Pf00641, Pf07719, Pf12185, Pf13414, Pf13432, Pf14559	5903	ENSG00000153201.15		RANBP2		2	RNA transport		Rev-mediated nuclear export of HIV RNA; ISG15 antiviral mechanism; NEP/NS2 Interacts with the Cellular Export Machinery; Separation of Sister Chromatids; tRNA processing in the nucleus; Transcriptional regulation by small RNAs; Nuclear Pore Complex (NPC) Disassembly; Regulation of Glucokinase by Glucokinase Regulatory Protein; Vpr-mediated nuclear import of PICs; Regulation of HSF1-mediated heat …	77	0.823	0.0251204	0.46361	2.45	9888.6	8138.1	4.95	0.65	High	High	High	High	High	High	1
FALSE	High	Master Protein	P23229-1	integrin alpha-6	OS=Homo sapiens]		1	1	1	1	1130	126.5	6.61	2.18	1	cell communication;cell differentiation;cell organization and biogenesis;cellular component movement;regulation of biological process;response to stimulus	cell surface;membrane	metal ion binding;protein binding	Pf01839, Pf08441, Pf13517	3655	ENSG00000091409.14		ITGA6		2	ECM-receptor interaction; Arrhythmogenic right ventricular cardiomyopathy (ARVC); Toxoplasmosis; PI3K-Akt signaling pathway; Dilated cardiomyopathy; Focal adhesion; Hypertrophic cardiomyopathy (HCM); Hematopoietic cell lineage; Regulation of actin cytoskeleton; Cell adhesion molecules (CAMs); Small cell lung cancer; Pathways in cancer	Integrin-mediated Cell Adhesion; Arrhythmogenic Right Ventricular Cardiomyopathy; Alpha 6 Beta 4 signaling pathway; Focal Adhesion; Regulation of Apoptosis by Parathyroid Hormone-related Protein; Focal Adhesion-PI3K-Akt-mTOR-signaling pathway	Integrin cell surface interactions; Laminin interactions; Basigin interactions; Assembly of collagen fibrils and other multimeric structures; Type I hemidesmosome assembly; Syndecan interactions	31	0.825	0.00469497	0.433092	2.99	527.8	435.1	4.93	5	High	High	High	High	High	High	1
FALSE	Medium	Master Protein	O95857	Tetraspanin-13	OS=Homo sapiens]		3	1	1	1	204	22.1	7.93	1.7	1	regulation of biological process;response to stimulus	membrane		Pf00335	27075	ENSG00000106537.7		TSPAN13		7				0	0.825	0.0174663	0.433092	3.93	811.1	678	4.85	5.68	High	High	High	High	High	High	1
FALSE	High	Master Protein	Q96C57	Uncharacterized protein C12orf43	OS=Homo sapiens]		6	1	2	1	262	28.2	9.42	2.02	1			protein binding		64897	ENSG00000157895.11		C12orf43		12				0	0.829	0.0359883	0.46361	1.14	105.8	87.1	8.89	15.07	High	High	High	High	High	High	1
FALSE	High	Master Protein	P18615	Negative elongation factor E	OS=Homo sapiens]		3	1	1	1	380	43.2	9.33	0	1	metabolic process;regulation of biological process	membrane;nucleus	protein binding;RNA binding	Pf00076, Pf13893, Pf14259, Pf14605	7936	ENSG00000204356.13; ENSG00000206268.11; ENSG00000233801.9; ENSG00000206357.11; ENSG00000231044.10; ENSG00000229363.9		NELFE; RDBP		6; CHR_HSCHR6_MHC_DBB_CTG1; CHR_HSCHR6_MHC_SSTO_CTG1; CHR_HSCHR6_MHC_QBL_CTG1; CHR_HSCHR6_MHC_COX_CTG1; CHR_HSCHR6_MHC_MCF_CTG1		Initiation of transcription and translation elongation at the HIV-1 LTR	HIV elongation arrest and recovery; Formation of the HIV-1 Early Elongation Complex; Abortive elongation of HIV-1 transcript in the absence of Tat; TP53 Regulates Transcription of DNA Repair Genes; Tat-mediated HIV elongation arrest and recovery; Formation of RNA Pol II elongation complex ; Formation of HIV elongation complex in the absence of HIV Tat; RNA Polymerase II Pre-transcription Events; …	26	0.829	0.0368094	0.46361	6.25	626.6	532	6.44	1.5	High	High	High	High	High	High	1
FALSE	High	Master Protein	Q13614-1	Myotubularin-related protein 2	OS=Homo sapiens]		4	2	3	2	643	73.3	7.4	2.06	2	cell organization and biogenesis;metabolic process;regulation of biological process	cytoplasm;cytosol;endosome;membrane;nucleus	catalytic activity;protein binding	Pf02893, Pf06602	8898	ENSG00000087053.18		MTMR2		11	Inositol phosphate metabolism; Metabolic pathways; Phosphatidylinositol signaling system		Synthesis of PIPs at the plasma membrane; Synthesis of PIPs at the ER membrane; Synthesis of PIPs at the early endosome membrane; Synthesis of PIPs at the late endosome membrane	11	0.83	0.0153824	0.433092	3.46	844.8	685	6.81	4.41	High	High	High	High	High	High	1
FALSE	High	Master Protein	Q96DB5	regulator of microtubule dynamics protein 1	OS=Homo sapiens]		9	3	5	3	314	35.8	8.5	9.77	3		cytoplasm;cytoskeleton;mitochondrion	protein binding		51115	ENSG00000176623.11		FAM82B; RMDN1		8				0	0.83	0.0278884	0.46361	5.95	1171.3	1003.2	2.89	4.38	High	High	High	High	High	High	1
FALSE	High	Master Protein	Q8N5A5-1	Zinc finger CCCH-type with G patch domain-containing protein	OS=Homo sapiens]		13	6	7	6	531	57.3	5.43	5.48	6	metabolic process;regulation of biological process	membrane;nucleus	DNA binding;metal ion binding;protein binding	Pf00642, Pf01585	84619	ENSG00000197114.11		ZGPAT		20				0	0.831	0.00876582	0.433092	3.43	386.4	321	3.61	7.41	High	High	High	High	High	High	1
FALSE	High	Master Protein	P12268	inosine-5'-monophosphate dehydrogenase 2	OS=Homo sapiens]		37	19	54	18	514	55.8	6.9	155.55	19	cell organization and biogenesis;cell proliferation;metabolic process;response to stimulus;transport	cytoplasm;cytosol;extracellular;membrane;nucleus;organelle lumen	catalytic activity;DNA binding;metal ion binding;nucleotide binding;protein binding;RNA binding	Pf00478, Pf00571, Pf00977, Pf01070, Pf03060	3615	ENSG00000178035.11		IMPDH2		3	Metabolic pathways; Drug metabolism - other enzymes; Purine metabolism		Neutrophil degranulation; Purine ribonucleoside monophosphate biosynthesis	10	0.833	0.0228829	0.456585	5.73	15723.7	13100.6	1.01	4.19	High	High	High	High	High	High	1
FALSE	High	Master Protein	O76021	Ribosomal L1 domain-containing protein 1	OS=Homo sapiens]		24	10	27	10	490	54.9	10.13	35.66	10	cell differentiation;metabolic process;regulation of biological process	membrane;nucleus	protein binding;RNA binding	Pf06030, Pf11797	26156	ENSG00000171490.12		RSL1D1		16		Senescence and Autophagy in Cancer		1	0.834	0.0333099	0.46361	3.67	8442.2	6870.2	7.86	4.21	High	High	High	High	High	High	1
FALSE	High	Master Protein	P83881	60S ribosomal protein L36a	OS=Homo sapiens]		39	6	18	6	106	12.4	10.58	15.77	6	cell organization and biogenesis;metabolic process;transport	cytoplasm;cytosol;membrane;ribosome	protein binding;RNA binding;structural molecule activity	Pf00935	6173	ENSG00000241343.9		RPL36A		X	Ribosome	Cytoplasmic Ribosomal Proteins	Peptide chain elongation; Eukaryotic Translation Termination; Viral mRNA Translation; L13a-mediated translational silencing of Ceruloplasmin expression; Nonsense Mediated Decay (NMD) independent of the Exon Junction Complex (EJC); Selenocysteine synthesis; Nonsense Mediated Decay (NMD) enhanced by the Exon Junction Complex (EJC); GTP hydrolysis and joining of the 60S ribosomal subunit; Major path…	34	0.835	0.00343598	0.433092	0.53	6867.9	5899.6	2.2	2.22	High	High	High	High	High	High	1	Methyl [K53]
FALSE	High	Master Protein	Q9UN86	Ras GTPase-activating protein-binding protein 2	OS=Homo sapiens]		24	9	23	9	482	54.1	5.55	53.39	9	cell organization and biogenesis;regulation of biological process;response to stimulus;transport	cytoplasm;cytosol	protein binding;RNA binding;structural molecule activity	Pf00076, Pf02136, Pf14259	9908	ENSG00000138757.14		G3BP2		4				0	0.835	0.0506575	0.479125	6.7	6089.9	5070.2	0.54	7.63	High	High	High	High	High	High	1
FALSE	High	Master Protein	Q14244	Ensconsin	OS=Homo sapiens]		11	7	10	7	749	84	9.61	3.46	7	cell organization and biogenesis;response to stimulus	cytoplasm;cytoskeleton;cytosol;membrane	protein binding;structural molecule activity		9053	ENSG00000135525.18		MAP7		6				0	0.835	0.051778	0.479125	5.66	1014.3	847.4	9.52	3.75	High	High	High	High	High	High	1
FALSE	High	Master Protein	Q15393-1	Splicing factor 3B subunit 3	OS=Homo sapiens]		22	22	46	22	1217	135.5	5.26	103.06	22	cell organization and biogenesis;metabolic process;regulation of biological process	nucleus;spliceosomal complex	protein binding;RNA binding	Pf03178, Pf10433	23450	ENSG00000189091.12		SF3B3		16	Spliceosome	mRNA Processing	mRNA Splicing - Major Pathway; mRNA Splicing - Minor Pathway	7	0.838	0.0406692	0.46361	7.94	14548	12520.4	6.53	1.97	High	High	High	High	High	High	1
FALSE	High	Master Protein	Q13435	Splicing factor 3b subunit 2	OS=Homo sapiens]		38	32	56	32	895	100.2	5.67	83.89	32	metabolic process	nucleus;spliceosomal complex	protein binding;RNA binding	Pf02037, Pf04037, Pf04046	10992	ENSG00000087365.15		SF3B2		11	Spliceosome	mRNA Processing	mRNA Splicing - Major Pathway; mRNA Splicing - Minor Pathway	7	0.838	0.0461361	0.478171	1.6	17685.9	15288	4.48	2.24	High	High	High	High	High	High	1
FALSE	High	Master Protein	Q96IR7	4-hydroxyphenylpyruvate dioxygenase-like protein	OS=Homo sapiens]		20	4	4	4	371	39.4	7.03	9.88	4	metabolic process		catalytic activity;metal ion binding	Pf12681	84842	ENSG00000186603.5		HPDL		1				0	0.84	0.00498995	0.433092	1.4	403.6	330.6	4.64	3.92	High	High	High	High	High	High	1
FALSE	High	Master Protein	Q9UJU6-1	Drebrin-like protein	OS=Homo sapiens]		30	9	15	1	430	48.2	5.05	37.8	9	cell organization and biogenesis;regulation of biological process;response to stimulus;transport	cytoplasm;cytoskeleton;cytosol;endosome;extracellular;Golgi;membrane;organelle lumen	enzyme regulator activity;protein binding	Pf00018, Pf00241, Pf07653, Pf14604	28988	ENSG00000136279.20		DBNL		7		T-Cell antigen Receptor (TCR) Signaling Pathway	Neutrophil degranulation; Caspase-mediated cleavage of cytoskeletal proteins; Neurexins and neuroligins	12	0.84	0.0195293	0.43752	2.2	1527.4	1190.4	10.46	11.75	High	High	High	High	High	High	1
FALSE	High	Master Protein	Q9UI30	Multifunctional methyltransferase subunit TRM112-like protein	OS=Homo sapiens]		44	4	10	4	125	14.2	5.26	22.26	4	cell organization and biogenesis;metabolic process;regulation of biological process	cytoplasm;cytosol;nucleus	catalytic activity;protein binding	Pf03966	51504	ENSG00000173113.6		TRMT112		11			tRNA modification in the nucleus and cytosol; Eukaryotic Translation Termination; rRNA modification in the nucleus and cytosol; Methylation	13	0.841	0.0301732	0.46361	3.57	2053.6	1794	5.39	8.76	High	High	High	High	High	High	1
FALSE	High	Master Protein	Q8WWI5	choline transporter-like protein 1	OS=Homo sapiens]		2	1	1	1	657	73.3	8.6	3.66	1	metabolic process;transport	membrane;mitochondrion	transporter activity	Pf04515	23446	ENSG00000070214.15		SLC44A1		9	Choline metabolism in cancer		Synthesis of PC; Choline catabolism; Transport of bile salts and organic acids, metal ions and amine compounds	11	0.841	0.0527222	0.479125	7.11	233.6	208.7	13.39	9.34	High	High	High	High	High	High	1
FALSE	High	Master Protein	Q27J81	Inverted formin-2	OS=Homo sapiens]		15	13	14	13	1249	135.5	5.38	21.84	13	cell organization and biogenesis;regulation of biological process	cytoplasm	protein binding	Pf02181, Pf06367, Pf06371	64423	ENSG00000203485.12		INF2		14		Primary Focal Segmental Glomerulosclerosis FSGS		1	0.842	0.0128641	0.433092	4.42	2195.3	1849.6	1.4	5.51	High	High	High	High	High	High	1
FALSE	High	Master Protein	Q96RP9	Elongation factor G, mitochondrial	OS=Homo sapiens]		18	11	14	11	751	83.4	7.01	15.31	11	metabolic process	mitochondrion;organelle lumen	catalytic activity;nucleotide binding;protein binding;RNA binding	Pf00009, Pf00679, Pf03144, Pf03764, Pf14492	85476	ENSG00000168827.14		GFM1		3			Mitochondrial translation elongation	4	0.843	0.0310883	0.46361	5.25	4851.4	4183.9	2.36	3.96	High	High	High	High	High	High	1
FALSE	High	Master Protein	Q9Y333	U6 snRNA-associated Sm-like protein LSm2	OS=Homo sapiens]		27	2	4	2	95	10.8	6.52	6.17	2	metabolic process	cytosol;nucleus;spliceosomal complex	protein binding;RNA binding	Pf01423	57819	ENSG00000204392.10; ENSG00000236826.7; ENSG00000231502.6; ENSG00000224979.6; ENSG00000172850.11; ENSG00000225998.6		LSM2		6; CHR_HSCHR6_MHC_COX_CTG1; CHR_HSCHR6_MHC_DBB_CTG1; CHR_HSCHR6_MHC_APD_CTG1; CHR_HSCHR6_MHC_QBL_CTG1; CHR_HSCHR6_MHC_MCF_CTG1	RNA degradation; Spliceosome	mRNA Processing	mRNA Splicing - Major Pathway; mRNA Splicing - Minor Pathway; mRNA decay by 5' to 3' exoribonuclease	10	0.844	0.00876526	0.433092	0.58	703.4	614.7	13.43	14.06	High	High	High	High	High	High	1
FALSE	Medium	Master Protein	O43427	Acidic fibroblast growth factor intracellular-binding protein	OS=Homo sapiens]		4	1	1	1	364	41.9	6.48	0	1	regulation of biological process;response to stimulus	membrane;mitochondrion;nucleus	protein binding	Pf05427	9158	ENSG00000172500.12		FIBP		11				0	0.845	0.0148523	0.433092	4.38	275.6	226.1	5.28	4.76	High	High	High	High	High	High	1
FALSE	High	Master Protein	Q15370	Elongin-B	OS=Homo sapiens]		27	5	7	5	118	13.1	4.88	5.04	5	cell organization and biogenesis;metabolic process;regulation of biological process;response to stimulus	cytosol;nucleus	protein binding	Pf00240	6923	ENSG00000103363.14		TCEB2; ELOB		16	Renal cell carcinoma; Ubiquitin mediated proteolysis; Pathways in cancer; HIF-1 signaling pathway	Dual hijack model of Vif in HIV infection	Oxygen-dependent proline hydroxylation of Hypoxia-inducible Factor Alpha; Tat-mediated HIV elongation arrest and recovery; Vif-mediated degradation of APOBEC3G; Pausing and recovery of HIV elongation; Antigen processing: Ubiquitination & Proteasome degradation; Neddylation; Formation of HIV-1 elongation complex containing HIV-1 Tat; HIV elongation arrest and recovery; TP53 Regulates Transcription…	45	0.845	0.0528444	0.479125	1.87	1554.4	1297.4	6.05	11.79	High	High	High	High	High	High	1
FALSE	High	Master Protein	P23921	Ribonucleoside-diphosphate reductase large subunit	OS=Homo sapiens]		36	25	42	25	792	90	7.15	105.64	25	metabolic process	cytoplasm;cytosol	catalytic activity;nucleotide binding;protein binding	Pf00317, Pf02867, Pf03477	6240	ENSG00000167325.14		RRM1		11	Purine metabolism; Pyrimidine metabolism; Metabolic pathways; Glutathione metabolism	Fluoropyrimidine Activity; Retinoblastoma (RB) in Cancer; Nucleotide Metabolism	Interconversion of nucleotide di- and triphosphates	10	0.847	0.034955	0.46361	6.41	8071	7006.1	7.81	3.71	High	High	High	High	High	High	1
FALSE	High	Master Protein	Q16762	thiosulfate sulfurtransferase	OS=Homo sapiens]		17	3	4	3	297	33.4	7.25	12	3	cell differentiation;metabolic process;transport	membrane;mitochondrion;organelle lumen	catalytic activity;RNA binding	Pf00581	7263	ENSG00000128311.13		TST		22	Sulfur relay system; Cysteine and methionine metabolism; Sulfur metabolism; Metabolic pathways		Sulfide oxidation to sulfate	9	0.848	0.0122773	0.433092	1.87	467.1	373.7	7.05	8.62	High	High	High	High	High	High	1
FALSE	High	Master Protein	Q9BTX1	Nucleoporin Ndc1	OS=Homo sapiens]		7	3	4	3	674	76.3	9.09	8.77	3	cell organization and biogenesis;metabolic process;regulation of biological process;transport	cytoplasm;cytoskeleton;membrane;nucleus	structural molecule activity	Pf09531	55706	ENSG00000058804.11		NDC1; TMEM48		1	RNA transport		Rev-mediated nuclear export of HIV RNA; ISG15 antiviral mechanism; NEP/NS2 Interacts with the Cellular Export Machinery; tRNA processing in the nucleus; Transcriptional regulation by small RNAs; Nuclear Pore Complex (NPC) Disassembly; Regulation of Glucokinase by Glucokinase Regulatory Protein; Vpr-mediated nuclear import of PICs; Regulation of HSF1-mediated heat shock response; snRNP Assembly; S…	64	0.85	0.0269451	0.46361	4.89	529.9	436.7	7.3	7.29	High	High	High	High	High	High	1
FALSE	High	Master Protein	O94964	Protein SOGA1	OS=Homo sapiens]		2	2	2	2	1423	159.7	6.46	3.85	2	regulation of biological process;response to stimulus	extracellular		Pf11365, Pf14818	140710			SOGA1		20				0	0.851	0.0525769	0.479125	3.76	229.2	194.1	6.51	0.92	High	High	High	High	High	High	1
FALSE	High	Master Protein	Q92552	28S ribosomal protein S27, mitochondrial	OS=Homo sapiens]		11	4	6	4	414	47.6	6.18	13.15	4	cell organization and biogenesis;cell proliferation;metabolic process;regulation of biological process	cytoplasm;membrane;mitochondrion;ribosome	protein binding;RNA binding	Pf10037, Pf12854, Pf13041	23107	ENSG00000113048.16		MRPS27		5			Mitochondrial translation initiation; Mitochondrial translation elongation; Mitochondrial translation termination	6	0.852	0.0442168	0.47626	5.71	2210.6	1856.2	16.26	12.88	High	High	High	High	High	High	1
FALSE	High	Master Protein	Q9NP72	Ras-related protein Rab-18	OS=Homo sapiens]		18	3	3	3	206	23	5.24	7.88	3	cell organization and biogenesis;development;regulation of biological process;response to stimulus;transport	cytosol;Golgi;membrane	catalytic activity;nucleotide binding;protein binding	Pf00025, Pf00071, Pf04670, Pf08477, Pf09439	22931	ENSG00000099246.16		RAB18		10			COPI-independent Golgi-to-ER retrograde traffic; Neutrophil degranulation; RAB GEFs exchange GTP for GDP on RABs; RAB geranylgeranylation	13	0.852	0.049082	0.479125	1.27	377.9	319.1	8.46	4.12	High	High	High	High	High	High	1
FALSE	High	Master Protein	P49327	Fatty acid synthase	OS=Homo sapiens]		41	82	189	82	2511	273.3	6.44	447.72	82	cell differentiation;metabolic process;regulation of biological process;response to stimulus	cytoplasm;cytosol;Golgi;membrane;mitochondrion	catalytic activity;nucleotide binding;protein binding;RNA binding	Pf00106, Pf00107, Pf00108, Pf00109, Pf00698, Pf00975, Pf02801, Pf08242, Pf08659, Pf13602, Pf14765	2194	ENSG00000169710.8		FASN		17	Insulin signaling pathway; Metabolic pathways; Fatty acid biosynthesis; Fatty acid metabolism; AMPK signaling pathway	AMP-activated Protein Kinase (AMPK) Signaling; Sterol Regulatory Element-Binding Proteins (SREBP) signalling; SREBF and miR33 in cholesterol and lipid homeostasis; Liver X Receptor Pathway; Fatty Acid Biosynthesis; Angiopoietin Like Protein 8 Regulatory Pathway	ChREBP activates metabolic gene expression; Fatty acyl-CoA biosynthesis; Vitamin B5 (pantothenate) metabolism; Activation of gene expression by SREBF (SREBP)	23	0.853	0.00824698	0.433092	3.13	57739.9	50460	2.75	1.44	High	High	High	High	High	High	1
FALSE	High	Master Protein	Q96KB5	Lymphokine-activated killer T-cell-originated protein kinase	OS=Homo sapiens]		13	4	7	4	322	36.1	5.12	18.61	4	metabolic process;regulation of biological process;response to stimulus	nucleus	catalytic activity;nucleotide binding;protein binding	Pf00069, Pf07714	55872	ENSG00000168078.9		PBK		8		4-hydroxytamoxifen, Dexamethasone, and Retinoic Acids Regulation of p27 Expression; VEGFA-VEGFR2 Signaling Pathway		2	0.855	0.0184447	0.433092	4.22	2153.9	1840.9	3.02	0.67	High	High	High	High	High	High	1
FALSE	High	Master Protein	P31153	S-adenosylmethionine synthase isoform type-2	OS=Homo sapiens]		35	16	41	14	395	43.6	6.48	56.14	16	cell organization and biogenesis;metabolic process	cytosol	catalytic activity;metal ion binding;nucleotide binding;protein binding	Pf00438, Pf02772, Pf02773	4144	ENSG00000168906.12		MAT2A		2	Cysteine and methionine metabolism; Metabolic pathways; Biosynthesis of amino acids	Trans-sulfuration and one carbon metabolism; One carbon metabolism and related pathways; Methylation Pathways	Methylation	10	0.855	0.0505404	0.479125	3.98	19331.7	15828.6	5.45	8.22	High	High	High	High	High	High	1
FALSE	High	Master Protein	O14737	Programmed cell death protein 5	OS=Homo sapiens]		45	7	13	7	125	14.3	6.04	35.33	7	cell death;regulation of biological process;response to stimulus	cytoplasm;cytosol;nucleus	DNA binding;enzyme regulator activity;protein binding	Pf01984	9141	ENSG00000105185.11		PDCD5		19				0	0.858	0.0259626	0.46361	2.7	7353	6478.4	6.42	5.58	High	High	High	High	High	High	1
FALSE	High	Master Protein	P51659-1	peroxisomal multifunctional enzyme type 2	OS=Homo sapiens]		36	21	48	21	736	79.6	8.84	117.84	21	cell differentiation;metabolic process	membrane;mitochondrion;organelle lumen	catalytic activity;protein binding	Pf00106, Pf01575, Pf02036, Pf08659, Pf13452, Pf13561, Pf14864	3295	ENSG00000133835.14		HSD17B4		5	Primary bile acid biosynthesis; Metabolic pathways; Peroxisome	Steroid Biosynthesis	Beta-oxidation of pristanoyl-CoA; Synthesis of bile acids and bile salts via 7alpha-hydroxycholesterol; alpha-linolenic acid (ALA) metabolism; Beta-oxidation of very long chain fatty acids	16	0.862	0.0157373	0.433092	4.4	10995.4	9237	3.3	1.87	High	High	High	High	High	High	1
FALSE	High	Master Protein	Q13263	Transcription intermediary factor 1-beta	OS=Homo sapiens]		47	28	55	28	835	88.5	5.77	134.05	28	cell organization and biogenesis;defense response;metabolic process;regulation of biological process;response to stimulus	chromosome;nucleus	catalytic activity;DNA binding;metal ion binding;protein binding;RNA binding	Pf00628, Pf00643	10155	ENSG00000130726.11		TRIM28		19		Corticotropin-releasing hormone signaling pathway; Mesodermal Commitment Pathway; ATM Signaling Network in Development and Disease	Generic Transcription Pathway	6	0.864	0.0124636	0.433092	1.67	14528.7	12555	5.17	2.92	High	High	High	High	High	High	1
FALSE	High	Master Protein	Q9Y3P4	rhomboid domain-containing protein 3	OS=Homo sapiens]		3	1	1	1	386	40.5	6.58	2.05	1	metabolic process;regulation of biological process;response to stimulus	membrane	catalytic activity;protein binding	Pf00627	25807	ENSG00000100263.13		RHBDD3		22				0	0.864	0.0471023	0.479125	9.03	569.8	515.3	4.79	9.85	High	High	High	High	High	High	1
FALSE	High	Master Protein	Q9H078-1	Caseinolytic peptidase B protein homolog	OS=Homo sapiens]		11	5	7	5	707	78.7	9.01	17.54	5	response to stimulus	mitochondrion	catalytic activity;nucleotide binding;protein binding	Pf00004, Pf00023, Pf06309, Pf06414, Pf07724, Pf07728, Pf10431, Pf12796, Pf13401, Pf13606, Pf13637, Pf13857	81570	ENSG00000162129.12		CLPB		11	Longevity regulating pathway - multiple species			1	0.867	0.0389004	0.46361	0.51	1293.5	1170.5	2.56	3.93	High	High	High	High	High	High	1
FALSE	High	Master Protein	O60716-1	Catenin delta-1	OS=Homo sapiens]		23	16	18	16	968	108.1	6.23	33.43	16	cell organization and biogenesis;metabolic process;regulation of biological process;response to stimulus	cytoplasm;cytosol;membrane;nucleus	protein binding	Pf00514	1500	ENSG00000198561.13		CTNND1		11	Adherens junction; Leukocyte transendothelial migration; Rap1 signaling pathway	VEGFA-VEGFR2 Signaling Pathway; Wnt Signaling Pathway and Pluripotency	VEGFR2 mediated vascular permeability; Adherens junctions interactions; InlA-mediated entry of Listeria monocytogenes into host cells	18	0.868	0.0537741	0.479125	8.26	3809.5	3262	4.49	2.33	High	High	High	High	High	High	1
FALSE	High	Master Protein	O95229	ZW10 interactor	OS=Homo sapiens]		8	2	2	2	277	31.3	5.15	3.19	2	cell division;cell organization and biogenesis;regulation of biological process	chromosome;cytoplasm;cytosol;nucleus	protein binding	Pf09731, Pf12128, Pf15556	11130	ENSG00000122952.16		ZWINT		10			Amplification of signal from unattached kinetochores via a MAD2 inhibitory signal; Separation of Sister Chromatids; Resolution of Sister Chromatid Cohesion; RHO GTPases Activate Formins	16	0.869	0.0147198	0.433092	3.55	409.4	368.8	3.81	4.48	High	High	High	High	High	High	1
FALSE	High	Master Protein	Q01650	large neutral amino acids transporter small subunit 1	OS=Homo sapiens]		7	3	11	3	507	55	7.72	20.48	3	cell differentiation;cellular component movement;development;metabolic process;transport	cytoplasm;cytosol;membrane	protein binding;transporter activity	Pf00324, Pf13520	8140	ENSG00000103257.8		SLC7A5		16	Central carbon metabolism in cancer; mTOR signaling pathway	Aryl Hydrocarbon Receptor Pathway	Tryptophan catabolism; Basigin interactions; Amino acid transport across the plasma membrane	14	0.869	0.0308093	0.46361	5.07	2710.3	2360.2	3.88	0.61	High	High	High	High	High	High	1
FALSE	High	Master Protein	P21912	Succinate dehydrogenase	ubiquinone] iron-sulfur subunit, mitochondrial	OS=Homo sapiens]	23	5	8	5	280	31.6	8.76	21.76	5	metabolic process;transport	membrane;mitochondrion	catalytic activity;metal ion binding;protein binding	Pf13085, Pf13183, Pf13534	6390	ENSG00000117118.9		SDHB		1	Parkinson's disease; Non-alcoholic fatty liver disease (NAFLD); Carbon metabolism; Alzheimer's disease; Huntington's disease; Citrate cycle (TCA cycle); Metabolic pathways; Oxidative phosphorylation	Electron Transport Chain; TCA Cycle	Respiratory electron transport; Citric acid cycle (TCA cycle)	16	0.87	0.0138396	0.433092	1.86	2199	1867.5	6.57	5.04	High	High	High	High	High	High	1
FALSE	High	Master Protein	Q9BVC4	target of rapamycin complex subunit LST8	OS=Homo sapiens]		9	2	2	2	326	35.9	5.86	6.51	2	cell organization and biogenesis;regulation of biological process;response to stimulus	cytoplasm;cytosol	enzyme regulator activity;protein binding	Pf00400	64223	ENSG00000167965.17		MLST8		16	mTOR signaling pathway; PI3K-Akt signaling pathway	Regulation of toll-like receptor signaling pathway; Target Of Rapamycin (TOR) Signaling; VEGFA-VEGFR2 Signaling Pathway; Angiopoietin Like Protein 8 Regulatory Pathway; Focal Adhesion-PI3K-Akt-mTOR-signaling pathway; Interferon type I signaling pathways; Senescence and Autophagy in Cancer	HSF1-dependent transactivation; Regulation of TP53 Degradation; mTORC1-mediated signalling; Constitutive Signaling by AKT1 E17K in Cancer; Energy dependent regulation of mTOR by LKB1-AMPK; CD28 dependent PI3K/Akt signaling; Regulation of PTEN gene transcription; VEGFR2 mediated vascular permeability; TP53 Regulates Metabolic Genes; Macroautophagy	43	0.87	0.0340675	0.46361	7.41	241.9	200.4	6.25	9.88	High	High	High	High	High	High	1
FALSE	High	Master Protein	Q99848	Probable rRNA-processing protein EBP2	OS=Homo sapiens]		30	8	14	8	306	34.8	10.1	19.61	8	metabolic process	nucleus	protein binding;RNA binding	Pf05890	10969	ENSG00000117395.12		EBNA1BP2		1			Major pathway of rRNA processing in the nucleolus and cytosol	4	0.871	0.00498043	0.433092	1.84	4691.8	4037.3	3.44	4.11	High	High	High	High	High	High	1
FALSE	High	Master Protein	P40937-1	Replication factor C subunit 5	OS=Homo sapiens]		12	3	4	3	340	38.5	7.2	2.83	3	cell organization and biogenesis;cellular homeostasis;metabolic process;regulation of biological process;response to stimulus	nucleus	catalytic activity;DNA binding;nucleotide binding;protein binding	Pf00004, Pf03215, Pf05496, Pf06068, Pf08542, Pf13086, Pf13173, Pf13177, Pf13401, Pf13479	5985	ENSG00000111445.13		RFC5		12	Nucleotide excision repair; DNA replication; Mismatch repair	Retinoblastoma (RB) in Cancer; DNA Replication	Translesion Synthesis by POLH; Termination of translesion DNA synthesis; Translesion synthesis by POLI; Recognition of DNA damage by PCNA-containing replication complex; Translesion synthesis by REV1; Polymerase switching on the C-strand of the telomere; Regulation of TP53 Activity through Phosphorylation; PCNA-Dependent Long Patch Base Excision Repair; G2/M DNA damage checkpoint; Translesion syn…	57	0.873	0.0189113	0.43431	4.38	837.7	716.6	2.85	3.58	High	High	High	High	High	High	1
FALSE	High	Master Protein	Q8WVQ1	Soluble calcium-activated nucleotidase 1	OS=Homo sapiens]		4	1	1	1	401	44.8	6.09	2.29	1	metabolic process;regulation of biological process;response to stimulus;transport	endoplasmic reticulum;extracellular;Golgi;membrane;organelle lumen	catalytic activity;metal ion binding;protein binding;signal transducer activity	Pf06079	124583	ENSG00000171302.16		CANT1		17	Pyrimidine metabolism; Purine metabolism		Neutrophil degranulation	5	0.873	0.0514563	0.479125	2.39	293.3	267.9	7.87	10.66	High	High	High	High	High	High	1
FALSE	High	Master Protein	Q9NZL4-1	Hsp70-binding protein 1	OS=Homo sapiens]		17	3	5	3	362	39.4	5.21	13.39	3	metabolic process;regulation of biological process		enzyme regulator activity;protein binding		23640			HSPBP1		19	Protein processing in endoplasmic reticulum			1	0.875	0.0490832	0.479125	0.64	869.6	766.6	5.34	2.11	High	High	High	High	High	High	1
FALSE	High	Master Protein	Q9C0B5	Palmitoyltransferase ZDHHC5	OS=Homo sapiens]		4	2	2	2	715	77.5	9.01	5.48	2	metabolic process	cytoplasm;membrane	catalytic activity;metal ion binding	Pf01529	25921	ENSG00000156599.10		ZDHHC5		11				0	0.876	0.00635179	0.433092	1.24	474.6	412.2	3.05	4.93	High	High	High	High	High	High	1
FALSE	Medium	Master Protein	Q92839	hyaluronan synthase 1	OS=Homo sapiens]		1	1	1	1	578	64.8	9.19	0	1	cell organization and biogenesis;metabolic process;regulation of biological process;response to stimulus	cytoplasm;membrane	catalytic activity	Pf00535, Pf03142, Pf13506, Pf13632, Pf13641	3036	ENSG00000105509.10		HAS1		19			Hyaluronan biosynthesis and export	5	0.876	0.0121317	0.433092	0.77	1085.1	945.5	3.36	6.15	High	High	High	High	High	High	1
FALSE	High	Master Protein	P50454	Serpin H1	OS=Homo sapiens]		31	11	30	11	418	46.4	8.69	60.86	11	cell organization and biogenesis;metabolic process;regulation of biological process;response to stimulus	cytoplasm;endoplasmic reticulum;membrane;organelle lumen	enzyme regulator activity;protein binding;RNA binding	Pf00079	871	ENSG00000149257.13		SERPINH1		11		Endochondral Ossification	Collagen biosynthesis and modifying enzymes	4	0.876	0.0159749	0.433092	3.78	10046	8830.8	1.27	2.3	High	High	High	High	High	High	1
FALSE	High	Master Protein	Q9NZ32	Actin-related protein 10	OS=Homo sapiens]		5	1	1	1	417	46.3	7.37	0	1	cellular component movement;transport	cytoplasm;cytoskeleton;cytosol;extracellular;organelle lumen	protein binding	Pf00022	55860	ENSG00000131966.13		ACTR10		14			COPI-independent Golgi-to-ER retrograde traffic; Neutrophil degranulation; COPI-mediated anterograde transport; MHC class II antigen presentation; HSP90 chaperone cycle for steroid hormone receptors (SHR)	19	0.879	0.00190518	0.433092	6.27	53.8	47.3	28.55	33.29	High	High	High	High	High	High	1
FALSE	High	Master Protein	Q96GQ7	Probable ATP-dependent RNA helicase DDX27	OS=Homo sapiens]		23	16	21	16	796	89.8	9.28	24.79	16	metabolic process	chromosome;cytoplasm;nucleus	catalytic activity;nucleotide binding;protein binding;RNA binding	Pf00270, Pf00271, Pf06862	55661	ENSG00000124228.14		DDX27		20				0	0.879	0.0134889	0.433092	1.85	1918.6	1687.3	1.72	0.79	High	High	High	High	High	High	1
FALSE	High	Master Protein	P82675	28S ribosomal protein S5, mitochondrial	OS=Homo sapiens]		6	3	5	3	430	48	9.92	3.78	3	cell organization and biogenesis;metabolic process	membrane;mitochondrion;ribosome	RNA binding;structural molecule activity	Pf00333, Pf03719	64969	ENSG00000144029.11		MRPS5		2	Ribosome		Mitochondrial translation initiation; Mitochondrial translation elongation; Mitochondrial translation termination	7	0.879	0.0361356	0.46361	5.74	2235.6	1944.5	5.98	6.17	High	High	High	High	High	High	1
FALSE	High	Master Protein	P42695	condensin-2 complex subunit D3	OS=Homo sapiens]		1	1	1	1	1498	168.8	7.5	3.76	1	cell division;cell organization and biogenesis;metabolic process	membrane;nucleus	protein binding	Pf12717, Pf15058	23310	ENSG00000151503.12		NCAPD3		11			Condensation of Prophase Chromosomes	5	0.88	0.0275476	0.46361	1.73	583.2	507.1	3.26	6.71	High	High	High	High	High	High	1
FALSE	High	Master Protein	O14744	Protein arginine N-methyltransferase 5	OS=Homo sapiens]		9	5	10	5	637	72.6	6.29	17.67	5	cell organization and biogenesis;cell proliferation;metabolic process;regulation of biological process	cytoplasm;cytosol;Golgi;nucleus	catalytic activity;DNA binding;nucleotide binding;protein binding	Pf02475, Pf05185	10419	ENSG00000100462.15		PRMT5		14	RNA transport		snRNP Assembly; Regulation of TP53 Activity through Methylation; RMTs methylate histone arginines	13	0.881	0.017186	0.433092	1.97	2355.8	2060.8	3.07	1.92	High	High	High	High	High	High	1
FALSE	High	Master Protein	P10586-1	Receptor-type tyrosine-protein phosphatase F	OS=Homo sapiens]		2	3	3	2	1907	212.7	6.3	3.03	3	cell organization and biogenesis;cellular component movement;metabolic process;regulation of biological process;response to stimulus	membrane	catalytic activity;protein binding;receptor activity;signal transducer activity	Pf00041, Pf00047, Pf00102, Pf07679, Pf13895, Pf13927, Pf14566	5792	ENSG00000142949.16		PTPRF		1	Adherens junction; Insulin signaling pathway; Insulin resistance; Cell adhesion molecules (CAMs)	Brain-Derived Neurotrophic Factor (BDNF) signaling pathway; Insulin Signaling	Receptor-type tyrosine-protein phosphatases; Synaptic adhesion-like molecules	10	0.882	0.00720305	0.433092	2.39	453.7	401.5	2.58	4.84	High	High	High	High	High	High	1
FALSE	High	Master Protein	P05556-1	Integrin beta-1	OS=Homo sapiens]		28	20	41	20	798	88.4	5.39	69.04	20	cell differentiation;cell growth;cell organization and biogenesis;cellular component movement;defense response;metabolic process;regulation of biological process;response to stimulus;transport	cell surface;cytoplasm;endosome;membrane	enzyme regulator activity;metal ion binding;protein binding;receptor activity;signal transducer activity	Pf00362, Pf07965, Pf08725	3688	ENSG00000150093.18		ITGB1		10	Pathways in cancer; PI3K-Akt signaling pathway; Dilated cardiomyopathy; Leukocyte transendothelial migration; Phagosome; Platelet activation; Rap1 signaling pathway; ECM-receptor interaction; Arrhythmogenic right ventricular cardiomyopathy (ARVC); Proteoglycans in cancer; Pertussis; Bacterial invasion of epithelial cells; Shigellosis; Cell adhesion molecules (CAMs); Regulation of actin cytoskelet…	Integrin-mediated Cell Adhesion; Prolactin Signaling Pathway; Neural Crest Differentiation; Arrhythmogenic Right Ventricular Cardiomyopathy; Pathogenic Escherichia coli infection; Primary Focal Segmental Glomerulosclerosis FSGS; Focal Adhesion; Signaling of Hepatocyte Growth Factor Receptor; Rac1/Pak1/p38/MMP-2 pathway; TGF-beta Signaling Pathway; Factors and pathways affecting insulin-like growt…	Integrin cell surface interactions; Signal transduction by L1; Basigin interactions; MET activates PTK2 signaling; Molecules associated with elastic fibres; Platelet Adhesion to exposed collagen; Syndecan interactions; CHL1 interactions; ECM proteoglycans; Laminin interactions; Localization of the PINCH-ILK-PARVIN complex to focal adhesions; Immunoregulatory interactions between a Lymphoid and a …	74	0.882	0.0078867	0.433092	0.01	7316.2	6451.1	5.34	7.06	High	High	High	High	High	High	1
FALSE	High	Master Protein	Q9BWU0	kanadaptin	OS=Homo sapiens]		6	3	4	3	796	88.8	5.19	9.61	3		cytoplasm;membrane;nucleus	protein binding;RNA binding	Pf00035, Pf00498	22950	ENSG00000163798.13		SLC4A1AP		2				0	0.882	0.0454218	0.478123	2.34	619	554.4	5.03	9.88	High	High	High	High	High	High	1
FALSE	High	Master Protein	Q96LD4	Tripartite motif-containing protein 47	OS=Homo sapiens]		9	5	7	5	638	69.5	6.44	8.06	5		cytoplasm;cytosol;nucleus	metal ion binding;protein binding	Pf00097, Pf00622, Pf00643, Pf13445, Pf13639, Pf13765, Pf13920, Pf13923, Pf14634, Pf15227	91107	ENSG00000132481.6		TRIM47		17				0	0.885	0.0378479	0.46361	3.8	2100	1752.9	8.28	8.53	High	High	High	High	High	High	1
FALSE	High	Master Protein	P01891	HLA class I histocompatibility antigen, A-68 alpha chain	OS=Homo sapiens]		51	15	61	5	365	40.9	6.7	165.06	15	regulation of biological process;response to stimulus	cell surface;endoplasmic reticulum;Golgi;membrane	protein binding;RNA binding	Pf00129, Pf07654	3105			HLA-A		6		Proteasome Degradation; Allograft Rejection	Interferon alpha/beta signaling; ER-Phagosome pathway; Immunoregulatory interactions between a Lymphoid and a non-Lymphoid cell; Endosomal/Vacuolar pathway; Interferon gamma signaling; Antigen Presentation: Folding, assembly and peptide loading of class I MHC	14	0.887	0.0216275	0.444234	1.93	8621.3	7749.8	3.56	1.01	High	High	High	High	High	High	1
FALSE	High	Master Protein	P22392-2	Isoform 3 of Nucleoside diphosphate kinase B	OS=Homo sapiens]		76	17	99	9	267	30.1	8.92	202.62	17	cell organization and biogenesis;cellular homeostasis;metabolic process;regulation of biological process;response to stimulus;transport	cytoplasm;cytosol;extracellular;membrane;nucleus;organelle lumen	catalytic activity;DNA binding;metal ion binding;nucleotide binding;protein binding;RNA binding	Pf00334	654364; 4830; 4831	ENSG00000011052.21		NME1-NME2; NME1; NME2		17	Pyrimidine metabolism; Purine metabolism; Metabolic pathways	Nucleotide Metabolism		4	0.887	0.0370656	0.46361	0.46	17191.6	15670.2	2.5	2.06	High	High	High	High	High	High	1
FALSE	High	Master Protein	Q9UHB6	LIM domain and actin-binding protein 1	OS=Homo sapiens]		29	19	41	19	759	85.2	6.84	60.91	19	cell organization and biogenesis;regulation of biological process	cytoplasm;cytoskeleton	metal ion binding;protein binding	Pf00412	51474	ENSG00000050405.13		LIMA1		12				0	0.888	0.0246954	0.46361	0.37	8149.6	7235	4.98	9.51	High	High	High	High	High	High	1
FALSE	High	Master Protein	Q96SB4-3	Isoform 1 of SRSF protein kinase 1	OS=Homo sapiens]		4	3	3	2	826	92.4	7.71	2.35	3	cell organization and biogenesis;defense response;metabolic process;regulation of biological process;response to stimulus	cytoplasm;cytosol;endoplasmic reticulum;membrane;nucleus	catalytic activity;metal ion binding;nucleotide binding;protein binding;RNA binding	Pf00069, Pf07714	6732			SRPK1		6		mRNA Processing		1	0.889	0.0177567	0.433092	1.11	721	654.3	12.95	11.9	High	High	High	High	High	High	1
FALSE	High	Master Protein	Q9H9L3	Interferon-stimulated 20 kDa exonuclease-like 2	OS=Homo sapiens]		4	1	1	1	353	39.1	9.94	4.44	1	metabolic process	nucleus	catalytic activity;protein binding;RNA binding	Pf00929	81875	ENSG00000143319.16		ISG20L2		1			Major pathway of rRNA processing in the nucleolus and cytosol	4	0.889	0.0276927	0.46361	0.57	109.9	95.1	6.31	8.8	High	High	High	High	High	High	1
FALSE	High	Master Protein	Q9BV40	vesicle-associated membrane protein 8	OS=Homo sapiens]		18	2	2	2	100	11.4	7.34	3.02	2	cell organization and biogenesis;metabolic process;regulation of biological process;transport	cytoplasm;cytosol;endosome;membrane;vacuole	protein binding	Pf00957	8673	ENSG00000118640.10		VAMP8		2	Platelet activation; SNARE interactions in vesicular transport		Cargo recognition for clathrin-mediated endocytosis; Neutrophil degranulation; ER-Phagosome pathway; Golgi Associated Vesicle Biogenesis; Lysosome Vesicle Biogenesis	17	0.89	0.000338021	0.277671	0.04	586.6	522.5	3.13	3.13	High	High	High	High	High	High	1
FALSE	High	Master Protein	O00232-1	26s proteasome non-atpase regulatory subunit 12	OS=Homo sapiens]		18	6	9	6	456	52.9	7.65	15.27	6	metabolic process;regulation of biological process;response to stimulus;transport	cytoplasm;cytosol;extracellular;membrane;organelle lumen;proteasome	catalytic activity;protein binding	Pf01399	5718	ENSG00000197170.9		PSMD12		17	Proteasome; Epstein-Barr virus infection	Proteasome Degradation; Parkin-Ubiquitin Proteasomal System pathway	Regulation of RAS by GAPs; CDT1 association with the CDC6:ORC:origin complex; Downstream TCR signaling; UCH proteinases; NIK-->noncanonical NF-kB signaling; Hh mutants that don't undergo autocatalytic processing are degraded by ERAD; SCF-beta-TrCP mediated degradation of Emi1; Neutrophil degranulation; Cross-presentation of soluble exogenous antigens (endosomes); Separation of Sister Chromatids; …	153	0.891	0.000473034	0.277671	1.02	860.4	766.3	12.57	13.67	High	High	High	High	High	High	1
FALSE	High	Master Protein	P55735-1	protein SEC13 homolog	OS=Homo sapiens]		34	8	16	8	322	35.5	5.48	38.38	8	cell organization and biogenesis;regulation of biological process;transport	chromosome;cytosol;endoplasmic reticulum;membrane;nucleus;vacuole	protein binding	Pf00400	6396	ENSG00000157020.17		SEC13		3	RNA transport; Protein processing in endoplasmic reticulum; mTOR signaling pathway	Sterol Regulatory Element-Binding Proteins (SREBP) signalling	COPII (Coat Protein 2) Mediated Vesicle Transport; Amplification of signal from unattached kinetochores via a MAD2 inhibitory signal; Separation of Sister Chromatids; Resolution of Sister Chromatid Cohesion; Antigen Presentation: Folding, assembly and peptide loading of class I MHC; RHO GTPases Activate Formins; MHC class II antigen presentation	33	0.892	0.0390868	0.46361	4.12	4597.2	4099.6	0.35	3.59	High	High	High	High	High	High	1
FALSE	High	Master Protein	Q07020	60S ribosomal protein L18	OS=Homo sapiens]		32	6	22	6	188	21.6	11.72	48.58	6	cell organization and biogenesis;metabolic process;transport	cytoplasm;cytosol;endoplasmic reticulum;membrane;nucleus;ribosome	RNA binding;structural molecule activity	Pf00828	6141	ENSG00000063177.12		RPL18		19	Ribosome	Cytoplasmic Ribosomal Proteins	Peptide chain elongation; Eukaryotic Translation Termination; Viral mRNA Translation; L13a-mediated translational silencing of Ceruloplasmin expression; Nonsense Mediated Decay (NMD) independent of the Exon Junction Complex (EJC); Selenocysteine synthesis; Nonsense Mediated Decay (NMD) enhanced by the Exon Junction Complex (EJC); GTP hydrolysis and joining of the 60S ribosomal subunit; Major path…	34	0.894	0.033707	0.46361	4.27	4773.8	4182.6	3.46	1.38	High	High	High	High	High	High	1
FALSE	High	Master Protein	Q16698	2,4-dienoyl-CoA reductase, mitochondrial	OS=Homo sapiens]		12	3	3	3	335	36	9.28	8.51	3	cell organization and biogenesis;metabolic process	cytosol;mitochondrion;nucleus;organelle lumen	catalytic activity;nucleotide binding	Pf00106, Pf08659, Pf13561	1666	ENSG00000104325.6		DECR1		8		Fatty Acid Beta Oxidation; Fatty Acid Biosynthesis	mitochondrial fatty acid beta-oxidation of unsaturated fatty acids	7	0.897	0.0267517	0.46361	1.32	934.4	854.4	1.38	3.07	High	High	High	High	High	High	1
FALSE	High	Master Protein	Q14247-1	Src substrate cortactin	OS=Homo sapiens]		56	34	93	34	550	61.5	5.4	183.07	34	cell organization and biogenesis;cellular component movement;regulation of biological process;transport	cytoplasm;cytoskeleton;cytosol;Golgi;membrane	protein binding	Pf00018, Pf02218, Pf07653, Pf14604	2017	ENSG00000085733.15		CTTN		11	Tight junction; Bacterial invasion of epithelial cells; Pathogenic Escherichia coli infection; Shigellosis; Proteoglycans in cancer	Pathogenic Escherichia coli infection; Hepatitis C and Hepatocellular Carcinoma	RHO GTPases activate PAKs; Clathrin-mediated endocytosis	14	0.898	0.0114906	0.433092	1.85	24517.3	21873.4	1.3	1.15	High	High	High	High	High	High	1
FALSE	High	Master Protein	O00159-3	Isoform 3 of Unconventional myosin-Ic	OS=Homo sapiens]		16	13	19	13	1044	119.6	9.45	33.37	13	cell organization and biogenesis;regulation of biological process;response to stimulus;transport	cytoplasm;cytosol;membrane	catalytic activity;motor activity;nucleotide binding;protein binding	Pf00063, Pf06017	4641	ENSG00000197879.14		MYO1C		17		Insulin Signaling	B-WICH complex positively regulates rRNA expression	5	0.898	0.0538325	0.479125	3.17	2382	1977.6	9.15	10.31	High	High	High	High	High	High	1
FALSE	High	Master Protein	P62195-1	26S proteasome regulatory subunit 8	OS=Homo sapiens]		44	13	24	12	406	45.6	7.55	54.57	13	metabolic process;regulation of biological process;response to stimulus;transport	cytoplasm;cytosol;membrane;nucleus;proteasome	catalytic activity;nucleotide binding;protein binding;RNA binding	Pf00004, Pf00910, Pf01057, Pf01078, Pf05496, Pf06068, Pf06414, Pf07724, Pf07726, Pf07728, Pf13191, Pf13207, Pf13401	5705	ENSG00000087191.12		PSMC5		17	Proteasome; Epstein-Barr virus infection	Proteasome Degradation; Parkin-Ubiquitin Proteasomal System pathway	Regulation of RAS by GAPs; CDT1 association with the CDC6:ORC:origin complex; Downstream TCR signaling; UCH proteinases; NIK-->noncanonical NF-kB signaling; Hh mutants that don't undergo autocatalytic processing are degraded by ERAD; SCF-beta-TrCP mediated degradation of Emi1; Cross-presentation of soluble exogenous antigens (endosomes); Separation of Sister Chromatids; Vpu mediated degradation o…	152	0.899	0.0330177	0.46361	3.64	5810.2	5354.2	5.5	3.39	High	High	High	High	High	High	1
FALSE	High	Master Protein	P13667	Protein disulfide-isomerase A4	OS=Homo sapiens]		47	29	78	29	645	72.9	5.07	109.74	29	cellular homeostasis;metabolic process;regulation of biological process;response to stimulus;transport	cell surface;endoplasmic reticulum;organelle lumen	catalytic activity;metal ion binding;protein binding;RNA binding	Pf00085, Pf01216, Pf13098, Pf13848, Pf13905	9601	ENSG00000155660.10		PDIA4		7	Protein processing in endoplasmic reticulum; Thyroid hormone synthesis; Vibrio cholerae infection			3	0.9	0.0415495	0.46361	4.02	25875	23033.5	2.89	4.4	High	High	High	High	High	High	1
FALSE	High	Master Protein	Q8NHP8	Putative phospholipase B-like 2	OS=Homo sapiens]		3	1	1	1	589	65.4	6.8	0	1	metabolic process	organelle lumen;vacuole	catalytic activity	Pf04916	196463	ENSG00000151176.7		PLBD2		12				0	0.901	0.0419591	0.46361	2.4	35.1	31.7	14.3	17.04	High	High	High	High	High	High	1
FALSE	High	Master Protein	P50502	Hsc70-interacting protein	OS=Homo sapiens]		38	16	42	16	369	41.3	5.27	73.87	16	cell organization and biogenesis;metabolic process;regulation of biological process	cytoplasm;cytosol	nucleotide binding;protein binding	Pf00515, Pf13371, Pf13414, Pf13431, Pf13432	6767	ENSG00000100380.13		ST13		22			Regulation of HSF1-mediated heat shock response	4	0.901	0.0454739	0.478123	0.28	16268.5	13846	4.68	3.74	High	High	High	High	High	High	1
FALSE	High	Master Protein	Q68CZ2-1	Tensin-3	OS=Homo sapiens]		11	8	12	8	1445	155.2	6.81	24.14	8	cellular component movement;regulation of biological process	cytosol	protein binding	Pf00017, Pf08416, Pf10409	64759	ENSG00000136205.16		TNS3		7			MET interacts with TNS proteins	5	0.902	0.00910814	0.433092	0.9	1776.1	1612.4	1	2.57	High	High	High	High	High	High	1
FALSE	High	Master Protein	O95782	AP-2 complex subunit alpha-1	OS=Homo sapiens]		14	12	14	8	977	107.5	7.03	32.57	12	cell organization and biogenesis;cellular component movement;metabolic process;regulation of biological process;response to stimulus;transport	cytosol;membrane	protein binding;transporter activity	Pf01602, Pf02296, Pf02883, Pf13646	160	ENSG00000196961.12		AP2A1		19	Endocrine and other factor-regulated calcium reabsorption; Endocytosis; Synaptic vesicle cycle; Huntington's disease	Synaptic Vesicle Pathway; EGF/EGFR Signaling Pathway	Cargo recognition for clathrin-mediated endocytosis; Nef Mediated CD8 Down-regulation; Nef Mediated CD4 Down-regulation; Trafficking of GluR2-containing AMPA receptors; Recycling pathway of L1; LDL clearance; EPH-ephrin mediated repulsion of cells; Retrograde neurotrophin signalling; VLDLR internalisation and degradation; WNT5A-dependent internalization of FZD2, FZD5 and ROR2; MHC class II antige…	48	0.902	0.0341541	0.46361	0.72	2856.3	2551.8	6.26	3.88	High	High	High	High	High	High	1
FALSE	High	Master Protein	O00303	Eukaryotic translation initiation factor 3 subunit F	OS=Homo sapiens]		22	7	14	7	357	37.5	5.45	35.14	7	metabolic process	cytoplasm;cytosol;membrane	catalytic activity;protein binding;RNA binding	Pf01398, Pf13012	8665	ENSG00000280606.3; ENSG00000175390.13		EIF3F		11; CHR_HSCHR11_1_CTG1_2	RNA transport	Translation Factors	Formation of the ternary complex, and subsequently, the 43S complex; L13a-mediated translational silencing of Ceruloplasmin expression; Translation initiation complex formation; GTP hydrolysis and joining of the 60S ribosomal subunit; Formation of a pool of free 40S subunits; Ribosomal scanning and start codon recognition	13	0.902	0.035602	0.46361	2.76	2685.3	2467	5.51	2.74	High	High	High	High	High	High	1
FALSE	High	Master Protein	P20839-6	Isoform 6 of Inosine-5'-monophosphate dehydrogenase 1	OS=Homo sapiens]		8	4	5	3	599	64.3	7.02	7.18	4	cell proliferation;metabolic process;transport	cytoplasm;cytosol;extracellular;nucleus;organelle lumen	catalytic activity;DNA binding;metal ion binding;RNA binding	Pf00478, Pf00571, Pf00977, Pf01070, Pf03060, Pf05690	3614	ENSG00000106348.16		IMPDH1		7		Nucleotide Metabolism		1	0.903	0.040178	0.46361	1.55	1049.8	941	1.3	4.57	High	High	High	High	High	High	1
FALSE	High	Master Protein	Q14974	Importin subunit beta-1	OS=Homo sapiens]		24	21	58	21	876	97.1	4.78	101.54	21	cell organization and biogenesis;cellular component movement;metabolic process;regulation of biological process;response to stimulus;transport	cytoplasm;cytosol;extracellular;membrane;nucleus;organelle lumen	metal ion binding;protein binding;RNA binding;transporter activity	Pf02985, Pf03810, Pf13513, Pf13646	3837	ENSG00000108424.9		KPNB1		17	RNA transport	Sterol Regulatory Element-Binding Proteins (SREBP) signalling	ISG15 antiviral mechanism; NS1 Mediated Effects on Host Pathways; Nuclear import of Rev protein; Neutrophil degranulation; Regulation of cholesterol biosynthesis by SREBP (SREBF); Transport of Ribonucleoproteins into the Host Nucleus; Activation of DNA fragmentation factor	29	0.904	0.0065612	0.433092	1.13	16492.9	14642.1	4.95	4.77	High	High	High	High	High	High	1
FALSE	High	Master Protein	Q8TCG1	Protein CIP2A	OS=Homo sapiens]		1	1	1	1	905	102.1	6.23	4.31	1	cell differentiation;cell organization and biogenesis;metabolic process;regulation of biological process	cytoplasm;cytosol;membrane	catalytic activity;motor activity;protein binding	Pf00769, Pf01576, Pf02463, Pf04111, Pf05103, Pf05483, Pf05557, Pf05667, Pf06637, Pf07111, Pf07888, Pf08317, Pf08614, Pf10174, Pf12072, Pf12128, Pf13166, Pf13476, Pf13868, Pf13870, Pf14257, Pf14943	57650	ENSG00000163507.13		KIAA1524; CIP2A		3				0	0.905	0.029463	0.46361	3.19	279.6	249	2.72	2.94	High	High	High	High	High	High	1
FALSE	High	Master Protein	Q99961	Endophilin-A2	OS=Homo sapiens]		20	6	9	5	368	41.5	5.43	14.86	6	cell organization and biogenesis;regulation of biological process;response to stimulus;transport	cytoplasm;endosome;membrane	protein binding	Pf00018, Pf03114, Pf07653, Pf10455, Pf13514, Pf14604	6455	ENSG00000141985.9		SH3GL1		19	Endocytosis		Cargo recognition for clathrin-mediated endocytosis; Negative regulation of MET activity; EGFR downregulation; InlB-mediated entry of Listeria monocytogenes into host cell	15	0.906	0.0311023	0.46361	1.64	2749.5	2365.1	6.82	6.85	High	High	High	High	High	High	1
FALSE	High	Master Protein	Q92575	UBX domain-containing protein 4	OS=Homo sapiens]		6	2	2	2	508	56.7	6.38	7.65	2	metabolic process;response to stimulus	cytosol;endoplasmic reticulum;membrane;nucleus	protein binding	Pf00789	23190	ENSG00000144224.16		UBXN4		2				0	0.91	0.0192661	0.43752	2.46	671.4	608.7	1.71	2.48	High	High	High	High	High	High	1
FALSE	High	Master Protein	P33991	DNA replication licensing factor MCM4	OS=Homo sapiens]		30	18	29	18	863	96.5	6.74	69.18	18	metabolic process	membrane;nucleus	catalytic activity;DNA binding;nucleotide binding;protein binding	Pf00493, Pf07728, Pf14551	4173	ENSG00000104738.16		MCM4		8	DNA replication; Cell cycle	Cell Cycle; Gastric Cancer Network 1; Retinoblastoma (RB) in Cancer; G1 to S cell cycle control; DNA Replication	M/G1 Transition; Assembly of the pre-replicative complex; Unwinding of DNA; Regulation of DNA replication; Activation of ATR in response to replication stress; Activation of the pre-replicative complex; Orc1 removal from chromatin; Removal of licensing factors from origins	27	0.911	0.0171717	0.433092	0.96	4531.8	4155.3	9.31	8	High	High	High	High	High	High	1
FALSE	High	Master Protein	Q9H2G2-1	STE20-like serine/threonine-protein kinase	OS=Homo sapiens]		8	9	13	9	1235	142.6	5.15	16.63	9	cell death;cell organization and biogenesis;metabolic process;regulation of biological process;response to stimulus	cytoplasm	catalytic activity;nucleotide binding;protein binding	Pf00069, Pf07714, Pf12474, Pf14531	9748	ENSG00000065613.13		SLK		10	Oocyte meiosis			1	0.911	0.0264899	0.46361	0.01	1638	1492.7	9.13	6.93	High	High	High	High	High	High	1
FALSE	High	Master Protein	O00267	Transcription elongation factor Spt5	OS=Homo sapiens]		12	10	15	10	1087	120.9	5.06	24.87	10	cell organization and biogenesis;development;metabolic process;regulation of biological process;response to stimulus	nucleus	DNA binding;protein binding;RNA binding	Pf00467, Pf03439, Pf04731, Pf07223, Pf11029, Pf11942, Pf12815	6829	ENSG00000196235.13		SUPT5H		19		Initiation of transcription and translation elongation at the HIV-1 LTR; mRNA Processing	RNA polymerase II transcribes snRNA genes; Abortive elongation of HIV-1 transcript in the absence of Tat; Tat-mediated HIV elongation arrest and recovery; Pausing and recovery of HIV elongation; Formation of HIV-1 elongation complex containing HIV-1 Tat; HIV elongation arrest and recovery; RNA Pol II CTD phosphorylation and interaction with CE; Formation of the HIV-1 Early Elongation Complex; TP5…	32	0.911	0.0420508	0.46361	2.54	2826.4	2619.1	6.86	4.37	High	High	High	High	High	High	1
FALSE	High	Master Protein	Q86YZ3	Hornerin	OS=Homo sapiens]		5	2	3	2	2850	282.2	10.04	2.63	2	cell organization and biogenesis;development;transport	cytoplasm;cytoskeleton;extracellular;nucleus;organelle lumen	metal ion binding		388697	ENSG00000197915.5		HRNR		1			Neutrophil degranulation	3	0.914	0.0532661	0.479125	0.86	170.5	148.2	14.21	17.75	High	High	High	High	High	High	1
FALSE	High	Master Protein	Q9UHD1	cysteine and histidine-rich domain-containing protein 1	OS=Homo sapiens]		49	13	30	13	332	37.5	7.87	72.89	13	metabolic process;regulation of biological process		metal ion binding;nucleotide binding;protein binding	Pf04968, Pf04969	26973	ENSG00000110172.11		CHORDC1		11				0	0.915	0.0219786	0.444234	2.55	6340.7	5772.7	2.54	0.55	High	High	High	High	High	High	1
FALSE	High	Master Protein	O43172-1	U4/U6 small nuclear ribonucleoprotein Prp4	OS=Homo sapiens]		23	8	13	8	522	58.4	7.42	26.66	8	metabolic process	nucleus;spliceosomal complex	protein binding;RNA binding	Pf00400, Pf08799	9128	ENSG00000136875.12		PRPF4		9	Spliceosome	mRNA Processing	mRNA Splicing - Major Pathway	6	0.915	0.0346121	0.46361	3.92	2792.5	2580.5	1.73	2.12	High	High	High	High	High	High	1
FALSE	High	Master Protein	O15355	Protein phosphatase 1G	OS=Homo sapiens]		22	11	31	11	546	59.2	4.36	45.28	11	metabolic process;regulation of biological process	cytoplasm;membrane;nucleus	catalytic activity;metal ion binding;protein binding	Pf00481	5496	ENSG00000115241.10		PPM1G		2		mRNA Processing		1	0.916	0.00195122	0.433092	0.58	7226.4	6619.3	1.62	2.34	High	High	High	High	High	High	1
FALSE	High	Master Protein	O43504	Ragulator complex protein LAMTOR5	OS=Homo sapiens]		33	2	7	2	91	9.6	4.87	24.86	2	cell organization and biogenesis;regulation of biological process;response to stimulus	cytoplasm;cytosol;membrane;vacuole	protein binding;structural molecule activity		10542	ENSG00000134248.13		LAMTOR5		1	Hepatitis B; mTOR signaling pathway		Energy dependent regulation of mTOR by LKB1-AMPK; Regulation of PTEN gene transcription; mTORC1-mediated signalling; TP53 Regulates Metabolic Genes; Macroautophagy	17	0.922	0.0300716	0.46361	1.81	1919.3	1703.2	5.13	4.4	High	High	High	High	High	High	1
FALSE	High	Master Protein	P50990	T-complex protein 1 subunit theta	OS=Homo sapiens]		62	34	132	34	548	59.6	5.6	283.85	34	cell organization and biogenesis;metabolic process;regulation of biological process;transport	cytoplasm;cytoskeleton;cytosol;extracellular;organelle lumen	catalytic activity;nucleotide binding;protein binding	Pf00118	10694	ENSG00000156261.12		CCT8		21			BBSome-mediated cargo-targeting to cilium; Prefoldin mediated transfer of substrate to CCT/TriC; Cooperation of PDCL (PhLP1) and TRiC/CCT in G-protein beta folding; Association of TriC/CCT with target proteins during biosynthesis; Neutrophil degranulation; Folding of actin by CCT/TriC; Formation of tubulin folding intermediates by CCT/TriC	16	0.922	0.0301828	0.46361	2.4	48048.9	43882.5	1.38	3.72	High	High	High	High	High	High	1
FALSE	High	Master Protein	Q12846	Syntaxin-4	OS=Homo sapiens]		10	2	2	2	297	34.2	6.28	7.8	2	cell organization and biogenesis;regulation of biological process;response to stimulus;transport	cell surface;cytoplasm;cytosol;endosome;membrane;vacuole	enzyme regulator activity;protein binding	Pf00804, Pf05739	6810	ENSG00000103496.14		STX4		16	Vasopressin-regulated water reabsorption; SNARE interactions in vesicular transport	Insulin Signaling	Translocation of GLUT4 to the plasma membrane; Clathrin derived vesicle budding; Disinhibition of SNARE formation; ER-Phagosome pathway; Other interleukin signaling	20	0.925	0.00413995	0.433092	0.25	458.8	424.5	2.66	2	High	High	High	High	High	High	1
FALSE	High	Master Protein	P06493	Cyclin-dependent kinase 1	OS=Homo sapiens]		51	13	27	12	297	34.1	8.4	54.52	13	cell death;cell differentiation;cell division;cell organization and biogenesis;cell proliferation;cellular component movement;metabolic process;regulation of biological process;response to stimulus	cytoplasm;cytoskeleton;cytosol;membrane;mitochondrion;nucleus;organelle lumen	catalytic activity;nucleotide binding;protein binding;receptor activity	Pf00069, Pf01636, Pf07714, Pf14531	983	ENSG00000170312.15		CDK1		10	Cell cycle; Progesterone-mediated oocyte maturation; Oocyte meiosis; Viral carcinogenesis; Gap junction; Epstein-Barr virus infection; Herpes simplex infection; p53 signaling pathway	miRNA Regulation of DNA Damage Response; Cell Cycle; Regulation of Microtubule Cytoskeleton; Spinal Cord Injury; Retinoblastoma (RB) in Cancer; ATM Signaling Pathway; PPAR Alpha Pathway; TGF-beta Signaling Pathway; ATM Signaling Network in Development and Disease; G1 to S cell cycle control; DNA Damage Response	Regulation of PLK1 Activity at G2/M Transition; TP53 Regulates Transcription of Genes Involved in G2 Cell Cycle Arrest; Recruitment of NuMA to mitotic centrosomes; Ovarian tumor domain proteases; Loss of Nlp from mitotic centrosomes; Activation of E2F1 target genes at G1/S; MASTL Facilitates Mitotic Progression; Golgi Cisternae Pericentriolar Stack Reorganization; Activation of NIMA Kinases NEK9,…	95	0.925	0.00487137	0.433092	0.45	4987	4682.7	3.15	3.66	High	High	High	High	High	High	1
FALSE	High	Master Protein	Q99614	tetratricopeptide repeat protein 1	OS=Homo sapiens]		16	4	9	4	292	33.5	4.84	14.23	4	metabolic process	cytosol;membrane	protein binding	Pf00515, Pf13371, Pf13414, Pf13432, Pf13525	7265	ENSG00000113312.10		TTC1		5				0	0.929	0.037055	0.46361	0.58	2694.7	2551.5	9.15	8.03	High	High	High	High	High	High	1
FALSE	High	Master Protein	Q9HCU5	Prolactin regulatory element-binding protein	OS=Homo sapiens]		12	2	2	2	417	45.4	7.88	8.7	2	cell organization and biogenesis;metabolic process;regulation of biological process;transport	endoplasmic reticulum;membrane;nucleus	DNA binding;enzyme regulator activity;protein binding	Pf00400	10113	ENSG00000138073.13		PREB		2	Protein processing in endoplasmic reticulum		XBP1(S) activates chaperone genes; Cargo concentration in the ER; COPII (Coat Protein 2) Mediated Vesicle Transport	13	0.929	0.0484722	0.479125	3.14	158.8	144.5	4.73	2.89	High	High	High	High	High	High	1
FALSE	High	Master Protein	Q92522	Histone H1x	OS=Homo sapiens]		35	9	12	9	213	22.5	10.76	17.59	9	cell organization and biogenesis	chromosome;nucleus	DNA binding;protein binding;RNA binding	Pf00538	8971	ENSG00000184897.5		H1FX		3				0	0.931	0.00369806	0.433092	0.67	1457.6	1357.3	6.29	7.43	High	High	High	High	High	High	1
FALSE	High	Master Protein	Q6NZY4	Zinc finger CCHC domain-containing protein 8	OS=Homo sapiens]		14	7	8	7	707	78.5	4.87	17.69	7	metabolic process	nucleus;spliceosomal complex	metal ion binding;protein binding;RNA binding	Pf00098, Pf04046	55596	ENSG00000033030.13		ZCCHC8		12				0	0.931	0.00421458	0.433092	0.28	961.4	894.8	4.13	5.22	High	High	High	High	High	High	1
FALSE	High	Master Protein	O15027-1	Protein transport protein Sec16A	OS=Homo sapiens]		9	14	22	14	2179	233.4	5.63	31.51	14	cell organization and biogenesis;transport	cytosol;endoplasmic reticulum;Golgi;membrane	protein binding	Pf12931, Pf12932	9919			SEC16A		9			COPII (Coat Protein 2) Mediated Vesicle Transport	8	0.932	0.0458849	0.478123	3.77	2473.6	2341.1	1.07	2.67	High	High	High	High	High	High	1
FALSE	High	Master Protein	Q15149-4	Isoform 4 of Plectin	OS=Homo sapiens]		53	228	492	220	4547	515.9	5.8	927.7	228	cell organization and biogenesis	cytoplasm;cytoskeleton;cytosol;membrane	protein binding;RNA binding;structural molecule activity	Pf00307, Pf00681, Pf07812	5339	ENSG00000178209.14		PLEC		8				0	0.933	0.0161416	0.433092	1.41	131971	123308	0.99	1.85	High	High	High	High	High	High	1	Methyl [Q1616]
FALSE	High	Master Protein	Q9H0F6-1	Sharpin	OS=Homo sapiens]		3	1	1	1	387	39.9	5.8	3.89	1	cell organization and biogenesis;metabolic process;regulation of biological process;response to stimulus	cytoplasm;cytosol	catalytic activity;metal ion binding;protein binding		81858	ENSG00000179526.16		SHARPIN		8	NOD-like receptor signaling pathway		Regulation of TNFR1 signaling; TNFR1-induced NFkappaB signaling pathway; Neurexins and neuroligins	9	0.933	0.0176033	0.433092	0.99	640.2	597.3	0.41	2.14	High	High	High	High	High	High	1
FALSE	High	Master Protein	Q14126	Desmoglein-2	OS=Homo sapiens]		21	16	20	16	1118	122.2	5.24	43.35	16	cell death;cell organization and biogenesis;regulation of biological process;response to stimulus	cell surface;cytoskeleton;membrane	metal ion binding;protein binding	Pf00028, Pf01049	1829	ENSG00000046604.12		DSG2		18	Arrhythmogenic right ventricular cardiomyopathy (ARVC)	Arrhythmogenic Right Ventricular Cardiomyopathy	Apoptotic cleavage of cell adhesion proteins; Formation of the cornified envelope	10	0.934	0.000101002	0.163043	0.16	4742.7	4433.7	1.94	2.17	High	High	High	High	High	High	1
FALSE	High	Master Protein	P22570	NADPH:adrenodoxin oxidoreductase, mitochondrial	OS=Homo sapiens]		12	4	4	4	491	53.8	8.44	2.61	4	metabolic process;transport	mitochondrion;organelle lumen	catalytic activity;protein binding	Pf13450	2232			FDXR		17			Endogenous sterols; Defective CYP11A1 causes Adrenal insufficiency, congenital, with 46,XY sex reversal (AICSR); Electron transport from NADPH to Ferredoxin; Pregnenolone biosynthesis	15	0.934	0.0172772	0.433092	0.68	583.2	544.7	1.11	2.64	High	High	High	High	High	High	1
FALSE	High	Master Protein	Q13310-3	Isoform 3 of Polyadenylate-binding protein 4	OS=Homo sapiens]		33	21	59	9	660	72.3	9.35	118.21	21	coagulation;metabolic process	cytoplasm;cytosol;nucleus	protein binding;RNA binding	Pf00076, Pf00658, Pf13893, Pf14259	8761	ENSG00000090621.13		PABPC4		1				0	0.934	0.0467641	0.479125	2.51	3010.3	2774.8	3.04	0.94	High	High	High	High	High	High	1
FALSE	High	Master Protein	Q92917	G patch domain and KOW motifs-containing protein	OS=Homo sapiens]		41	11	19	11	476	52.2	6.15	55.34	11	metabolic process	nucleus	protein binding	Pf00467, Pf01585, Pf12656	27238	ENSG00000068394.10		GPKOW		X			mRNA Splicing - Major Pathway	4	0.935	0.0169794	0.433092	0.93	3681.8	3441.4	5.39	4.23	High	High	High	High	High	High	1
FALSE	High	Master Protein	Q92538	Golgi-specific brefeldin A-resistance guanine nucleotide exchange factor 1	OS=Homo sapiens]		6	8	9	8	1859	206.3	5.73	16.42	8	cell organization and biogenesis;cellular component movement;metabolic process;regulation of biological process;response to stimulus;transport	cytoplasm;cytosol;Golgi;membrane;mitochondrion;organelle lumen	protein binding	Pf01369, Pf12783	8729	ENSG00000107862.4		GBF1		10	Endocytosis		Clathrin derived vesicle budding; COPI-dependent Golgi-to-ER retrograde traffic; VxPx cargo-targeting to cilium; COPI-mediated anterograde transport	18	0.944	0.0162122	0.433092	1.07	2127.9	2023.2	10.39	9.73	High	High	High	High	High	High	1
FALSE	High	Master Protein	P28838	cytosol aminopeptidase	OS=Homo sapiens]		35	13	25	13	519	56.1	7.93	53.61	13	metabolic process	cytoplasm;cytosol;mitochondrion;nucleus	catalytic activity;metal ion binding	Pf00883, Pf02789	51056	ENSG00000002549.12		LAP3		4	Arginine and proline metabolism; Glutathione metabolism; Metabolic pathways			3	0.944	0.0185793	0.433092	1.92	4698.1	4487	1.55	2.8	High	High	High	High	High	High	1
FALSE	High	Master Protein	Q7Z2W4	zinc finger CCCH-type antiviral protein 1	OS=Homo sapiens]		13	8	12	8	902	101.4	8.4	22.03	8	defense response;metabolic process;regulation of biological process;response to stimulus	cytoplasm;cytosol;nucleus	catalytic activity;metal ion binding;nucleotide binding;protein binding;RNA binding	Pf00644	56829	ENSG00000105939.12		ZC3HAV1		7			Signaling by BRAF and RAF fusions	4	0.949	0.0141682	0.433092	0.42	2249	2109.3	2.05	1.75	High	High	High	High	High	High	1
FALSE	High	Master Protein	Q15386-1	Ubiquitin-protein ligase E3C	OS=Homo sapiens]		3	2	3	2	1083	123.8	6.71	6.46	2	metabolic process	cytoplasm;nucleus;proteasome	catalytic activity;protein binding	Pf00632	9690	ENSG00000009335.17		UBE3C		7	Ubiquitin mediated proteolysis		Antigen processing: Ubiquitination & Proteasome degradation	5	0.949	0.0397198	0.46361	2.88	180.4	174.6	2.71	3.85	High	High	High	High	High	High	1
FALSE	High	Master Protein	P05166-1	propionyl-CoA carboxylase beta chain, mitochondrial	OS=Homo sapiens]		9	3	3	3	539	58.2	7.64	10.6	3	metabolic process	cytosol;mitochondrion;organelle lumen	catalytic activity;nucleotide binding;protein binding	Pf01039	5096	ENSG00000114054.13		PCCB		3	Carbon metabolism; Glyoxylate and dicarboxylate metabolism; Valine, leucine and isoleucine degradation; Metabolic pathways; Propanoate metabolism		Defective HLCS causes multiple carboxylase deficiency; Biotin transport and metabolism; Propionyl-CoA catabolism	18	0.95	0.0453211	0.478123	1.22	582.5	558.1	8.9	7.98	High	High	High	High	High	High	1
FALSE	High	Master Protein	P42702-1	Leukemia inhibitory factor receptor	OS=Homo sapiens]		2	1	1	1	1097	123.7	5.72	3.4	1	regulation of biological process;response to stimulus	extracellular;membrane	protein binding;receptor activity;signal transducer activity	Pf00041	3977	ENSG00000113594.9		LIFR		5	Signaling pathways regulating pluripotency of stem cells; Cytokine-cytokine receptor interaction; Jak-STAT signaling pathway	Physiological and Pathological Hypertrophy of the Heart; Adipogenesis; Oncostatin M Signaling Pathway; ESC Pluripotency Pathways	IL-6-type cytokine receptor ligand interactions; RUNX1 regulates transcription of genes involved in interleukin signaling	17	0.952	0.00247161	0.433092	0.47	158.9	151.3	2.34	2.04	High	High	High	High	High	High	1
FALSE	High	Master Protein	P52888	thimet oligopeptidase	OS=Homo sapiens]		11	6	9	6	689	78.8	6.05	21.53	6	metabolic process	cytoplasm;cytosol	catalytic activity;metal ion binding	Pf01432	7064	ENSG00000172009.14		THOP1		19	Renin-angiotensin system; African trypanosomiasis		Antigen processing: Ubiquitination & Proteasome degradation	6	0.952	0.0095452	0.433092	0.64	1544.9	1477.1	7.72	8.95	High	High	High	High	High	High	1
FALSE	High	Master Protein	Q92598	Heat shock protein 105 kDa	OS=Homo sapiens]		48	37	81	32	858	96.8	5.39	188.18	37	metabolic process;regulation of biological process;response to stimulus;transport	cytoplasm;cytosol;extracellular;nucleus;organelle lumen	enzyme regulator activity;nucleotide binding;protein binding	Pf00012	10808	ENSG00000120694.19		HSPH1		13	Protein processing in endoplasmic reticulum		Scavenging by Class F Receptors; Regulation of HSF1-mediated heat shock response	8	0.954	0.0238947	0.46361	0.23	18645.6	17788	3.12	4.61	High	High	High	High	High	High	1
FALSE	High	Master Protein	Q9HAV0	Guanine nucleotide-binding protein subunit beta-4	OS=Homo sapiens]		35	8	20	4	340	37.5	6	50.62	8	metabolic process;regulation of biological process;response to stimulus	cytosol;membrane	protein binding;signal transducer activity	Pf00400	59345	ENSG00000114450.9		GNB4		3	Ras signaling pathway; Morphine addiction; Dopaminergic synapse; Cholinergic synapse; GABAergic synapse; Glutamatergic synapse; Pathways in cancer; PI3K-Akt signaling pathway; Circadian entrainment; Chemokine signaling pathway; Serotonergic synapse; Alcoholism; Retrograde endocannabinoid signaling	Myometrial Relaxation and Contraction Pathways; Chemokine signaling pathway; Focal Adhesion-PI3K-Akt-mTOR-signaling pathway; Calcium Regulation in the Cardiac Cell	G alpha (z) signalling events; G alpha (12/13) signalling events; Cooperation of PDCL (PhLP1) and TRiC/CCT in G-protein beta folding; G alpha (s) signalling events; Glucagon-type ligand receptors; Ca2+ pathway; Thromboxane signalling through TP receptor; ADP signalling through P2Y purinoceptor 1; ADP signalling through P2Y purinoceptor 12; Adrenaline,noradrenaline inhibits insulin secretion; Gluc…	64	0.955	0.0166569	0.433092	0.56	386.4	370.5	12.54	14.24	High	High	High	High	High	High	1
FALSE	High	Master Protein	Q9Y263	Phospholipase A-2-activating protein	OS=Homo sapiens]		22	10	13	10	795	87.1	6.37	34.64	10	cell communication;cellular homeostasis;defense response;metabolic process;regulation of biological process;response to stimulus	cytoplasm;nucleus	enzyme regulator activity;protein binding	Pf00400, Pf08324, Pf09070	9373	ENSG00000137055.14		PLAA		9	Protein processing in endoplasmic reticulum			1	0.958	0.0079703	0.433092	0.18	1627.6	1559.9	2.2	2.73	High	High	High	High	High	High	1
FALSE	High	Master Protein	P49458	Signal recognition particle 9 kDa protein	OS=Homo sapiens]		52	7	22	7	86	10.1	7.97	36.1	7	cell organization and biogenesis;regulation of biological process;transport	cytoplasm;cytosol	protein binding;RNA binding	Pf05486	6726; 653226	ENSG00000143742.12		SRP9; SRP9P1		1; 10	Protein export		SRP-dependent cotranslational protein targeting to membrane	4	0.959	0.0400714	0.46361	1.09	12266.6	11759.1	2.69	4.15	High	High	High	High	High	High	1
FALSE	High	Master Protein	Q12965	unconventional myosin-Ie	OS=Homo sapiens]		13	11	15	11	1108	127	8.92	42.52	11	cell differentiation;cell organization and biogenesis;cellular component movement;metabolic process;regulation of biological process;response to stimulus;transport	cytoplasm;cytoskeleton	catalytic activity;motor activity;nucleotide binding;protein binding	Pf00018, Pf00063, Pf06017, Pf07653, Pf14604	4643	ENSG00000157483.8		MYO1E		15		Primary Focal Segmental Glomerulosclerosis FSGS		1	0.96	0.0500838	0.479125	2.28	3202	3018	7.96	7.68	High	High	High	High	High	High	1
FALSE	High	Master Protein	P07814	Bifunctional glutamate/proline--tRNA ligase	OS=Homo sapiens]		43	59	144	59	1512	170.5	7.33	351.05	59	cell organization and biogenesis;metabolic process;regulation of biological process;response to stimulus	cytoplasm;cytosol;membrane	catalytic activity;metal ion binding;nucleotide binding;protein binding;RNA binding	Pf00458, Pf00587, Pf00749, Pf01406, Pf03129, Pf03950, Pf09180, Pf14497	2058	ENSG00000136628.17		EPRS		1	Porphyrin and chlorophyll metabolism; Aminoacyl-tRNA biosynthesis; Metabolic pathways	Parkinsons Disease Pathway; Amino Acid metabolism	tRNA modification in the nucleus and cytosol; Cytosolic tRNA aminoacylation; SeMet incorporation into proteins	16	0.965	0.040894	0.46361	1.95	28908.5	28277.6	3.78	4.32	High	High	High	High	High	High	1
FALSE	High	Master Protein	O95881	Thioredoxin domain-containing protein 12	OS=Homo sapiens]		36	5	8	5	172	19.2	5.4	19.45	5	cell differentiation;cellular homeostasis;metabolic process;regulation of biological process	endoplasmic reticulum;organelle lumen	catalytic activity;protein binding	Pf00085, Pf13098, Pf13899	51060	ENSG00000117862.11		TXNDC12		1	Glutathione metabolism			1	0.97	0.0197632	0.438525	0.94	1464.1	1406.7	1.81	1.93	High	High	High	High	High	High	1
FALSE	High	Master Protein	O60488-1	Long-chain-fatty-acid--CoA ligase 4	OS=Homo sapiens]		23	14	20	10	711	79.1	8.38	43.07	14	cell differentiation;metabolic process;regulation of biological process;response to stimulus;transport	cytoplasm;endoplasmic reticulum;membrane;mitochondrion	catalytic activity;nucleotide binding	Pf00501	2182	ENSG00000068366.19		ACSL4		X	PPAR signaling pathway; Adipocytokine signaling pathway; Peroxisome; Fatty acid biosynthesis; Fatty acid degradation; Fatty acid metabolism; Metabolic pathways	Fatty Acid Beta Oxidation; Fatty Acid Biosynthesis; Mitochondrial LC-Fatty Acid Beta-Oxidation; PPAR signaling pathway	Synthesis of very long-chain fatty acyl-CoAs	16	0.972	0.0495228	0.479125	0.78	1482	1461.7	2.52	2.81	High	High	High	High	High	High	1
FALSE	High	Master Protein	P43246-1	DNA mismatch repair protein MSH2	OS=Homo sapiens]		24	17	26	17	934	104.7	5.77	51.71	17	cell differentiation;cell organization and biogenesis;metabolic process;regulation of biological process;response to stimulus	membrane;nucleus	catalytic activity;DNA binding;metal ion binding;nucleotide binding;protein binding	Pf00488, Pf01624, Pf05188, Pf05190, Pf05192	4436	ENSG00000095002.13		MSH2		2	Platinum drug resistance; Pathways in cancer; Mismatch repair; Colorectal cancer	Rac1/Pak1/p38/MMP-2 pathway; Mismatch repair	Defective Mismatch Repair Associated With MSH3; Defective Mismatch Repair Associated With MSH2; Mismatch repair (MMR) directed by MSH2:MSH3 (MutSbeta); Mismatch repair (MMR) directed by MSH2:MSH6 (MutSalpha); TP53 Regulates Transcription of DNA Repair Genes; Defective Mismatch Repair Associated With MSH6	20	0.973	0.00389706	0.433092	0.25	3700.3	3600.9	4.38	4.2	High	High	High	High	High	High	1
FALSE	High	Master Protein	P07237	Protein disulfide-isomerase	OS=Homo sapiens]		67	41	189	41	508	57.1	4.87	385.32	41	cell organization and biogenesis;cellular homeostasis;metabolic process;regulation of biological process;response to stimulus	endoplasmic reticulum;extracellular;membrane;organelle lumen	catalytic activity;metal ion binding;protein binding;RNA binding	Pf00085, Pf01216, Pf13098, Pf13848, Pf13899, Pf13905	5034	ENSG00000185624.14		P4HB		17	Protein processing in endoplasmic reticulum		Post-translational protein phosphorylation; Regulation of Insulin-like Growth Factor (IGF) transport and uptake by Insulin-like Growth Factor Binding Proteins (IGFBPs); VLDL assembly; Chylomicron assembly; Collagen biosynthesis and modifying enzymes; Interleukin-12 family signaling; Detoxification of Reactive Oxygen Species; Hedgehog ligand biogenesis	23	0.979	0.0295539	0.46361	0.95	80581.2	78962.3	1.11	1.72	High	High	High	High	High	High	1
FALSE	High	Master Protein	Q4G0N4	NAD kinase 2, mitochondrial	OS=Homo sapiens]		17	5	6	5	442	49.4	8.18	16.8	5	metabolic process	mitochondrion;organelle lumen	catalytic activity;nucleotide binding;protein binding	Pf00781, Pf01513	133686	ENSG00000152620.12		NADK2; NADKD1		5	Nicotinate and nicotinamide metabolism; Metabolic pathways		Nicotinate metabolism	6	1.023	0.00564068	0.433092	0	508.3	521.7	10.18	10.18	High	High	High	High	High	High	1
FALSE	High	Master Protein	P41227-1	N-alpha-acetyltransferase 10	OS=Homo sapiens]		40	8	13	8	235	26.4	5.64	22.94	8	cell organization and biogenesis;metabolic process;regulation of biological process	cytoplasm;cytosol;membrane;nucleus;ribosome	catalytic activity;protein binding	Pf00583, Pf08445, Pf13508, Pf13527, Pf13673	8260	ENSG00000102030.15		NAA10		X				0	1.032	0.00709063	0.433092	0.15	3607	3726.4	9.17	9.32	High	High	High	High	High	High	1
FALSE	High	Master Protein	P26640	Valine--tRNA ligase	OS=Homo sapiens]		21	19	32	19	1264	140.4	7.59	82.75	19	metabolic process;regulation of biological process	cytoplasm;cytosol;mitochondrion	catalytic activity;nucleotide binding;protein binding	Pf00043, Pf00133, Pf08264, Pf09334, Pf13603	7407; 57176	ENSG00000096171.14; ENSG00000204394.12; ENSG00000226589.9		VARS; VARS2		6; CHR_HSCHR6_MHC_DBB_CTG1; CHR_HSCHR6_MHC_COX_CTG1	Aminoacyl-tRNA biosynthesis	Amino Acid metabolism	Cytosolic tRNA aminoacylation	6	1.051	0.0495769	0.479125	0.25	7976	8358.5	1	0.7	High	High	High	High	High	High	1
FALSE	High	Master Protein	O43684	Mitotic checkpoint protein BUB3	OS=Homo sapiens]		37	9	30	9	328	37.1	6.84	69.7	9	cell division;cell organization and biogenesis;metabolic process;regulation of biological process	chromosome;cytosol;nucleus	protein binding	Pf00400, Pf04762	9184	ENSG00000154473.17		BUB3		10	Cell cycle; HTLV-I infection	Cell Cycle	Inactivation of APC/C via direct inhibition of the APC/C complex; Amplification of signal from unattached kinetochores via a MAD2 inhibitory signal; Separation of Sister Chromatids; Resolution of Sister Chromatid Cohesion; RHO GTPases Activate Formins; Cdc20:Phospho-APC/C mediated degradation of Cyclin A; APC-Cdc20 mediated degradation of Nek2A	29	1.052	0.00236409	0.433092	0.19	8185.2	8610.6	5.09	4.7	High	High	High	High	High	High	1
FALSE	High	Master Protein	Q9UKK9	ADP-sugar pyrophosphatase	OS=Homo sapiens]		40	8	21	8	219	24.3	4.94	38.9	8	cell organization and biogenesis;metabolic process	cytosol;nucleus	catalytic activity;metal ion binding;protein binding;RNA binding	Pf00293	11164	ENSG00000165609.12		NUDT5		10	Purine metabolism		Phosphate bond hydrolysis by NUDT proteins	6	1.055	0.00914334	0.433092	0.44	4843.2	5111.7	2.39	3.18	High	High	High	High	High	High	1
FALSE	High	Master Protein	P61981	14-3-3 protein gamma	OS=Homo sapiens]		53	17	77	11	247	28.3	4.89	105.11	17	cell organization and biogenesis;regulation of biological process;response to stimulus;transport	cytoplasm;cytosol;membrane;mitochondrion	enzyme regulator activity;protein binding;RNA binding	Pf00244	7532	ENSG00000170027.6		YWHAG		7	Hippo signaling pathway; Cell cycle; Viral carcinogenesis; PI3K-Akt signaling pathway; Oocyte meiosis; Epstein-Barr virus infection	Cell Cycle; Prolactin Signaling Pathway; Myometrial Relaxation and Contraction Pathways; Calcium Regulation in the Cardiac Cell; Sudden Infant Death Syndrome (SIDS) Susceptibility Pathways	Chk1/Chk2(Cds1) mediated inactivation of Cyclin B:Cdk1 complex; Regulation of PLK1 Activity at G2/M Transition; AURKA Activation by TPX2; Anchoring of the basal body to the plasma membrane; Recruitment of NuMA to mitotic centrosomes; Activation of BAD and translocation to mitochondria ; Recruitment of mitotic centrosome proteins and complexes; Loss of Nlp from mitotic centrosomes; Translocation o…	48	1.057	0.0283389	0.46361	1.56	18393.4	19375.1	5.61	4.91	High	High	High	High	High	High	1
FALSE	High	Master Protein	Q9UBT2	SUMO-activating enzyme subunit 2	OS=Homo sapiens]		21	10	19	10	640	71.2	5.29	48.22	10	metabolic process;regulation of biological process	cytoplasm;nucleus	catalytic activity;enzyme regulator activity;metal ion binding;nucleotide binding;protein binding	Pf00899, Pf02134, Pf10585, Pf14732	10054	ENSG00000126261.12		UBA2		19	Ubiquitin mediated proteolysis		SUMO is conjugated to E1 (UBA2:SAE1); SUMO is transferred from E1 to E2 (UBE2I, UBC9)	7	1.058	0.00765654	0.433092	0.77	1668.6	1743.5	10.11	9.74	High	High	High	High	High	High	1
FALSE	High	Master Protein	P53365	Arfaptin-2	OS=Homo sapiens]		17	4	7	4	341	37.8	6.04	16.11	4	cell organization and biogenesis;cellular component movement;regulation of biological process;response to stimulus	cytoplasm;cytosol;membrane	nucleotide binding;protein binding	Pf03114, Pf06456	23647	ENSG00000132254.12		ARFIP2		11			Retrograde transport at the Trans-Golgi-Network	4	1.058	0.0421323	0.46361	0.18	1148.2	1213.9	2	0.56	High	High	High	High	High	High	1
FALSE	High	Master Protein	O43143	Pre-mRNA-splicing factor ATP-dependent RNA helicase DHX15	OS=Homo sapiens]		27	19	29	19	795	90.9	7.46	41.71	19	metabolic process;response to stimulus	cytoplasm;nucleus;spliceosomal complex	catalytic activity;nucleotide binding;protein binding;RNA binding	Pf00270, Pf00271, Pf04408, Pf07717, Pf13401	1665	ENSG00000109606.12		DHX15		4	Spliceosome	mRNA Processing	mRNA Splicing - Major Pathway	6	1.059	0.0419774	0.46361	0.27	3354.9	3710.9	5.15	5.01	High	High	High	High	High	High	1
FALSE	High	Master Protein	Q9Y2W1	Thyroid hormone receptor-associated protein 3	OS=Homo sapiens]		24	19	43	19	955	108.6	10.15	77.78	19	metabolic process;regulation of biological process;response to stimulus	nucleus	DNA binding;nucleotide binding;protein binding;receptor activity;RNA binding	Pf15440	9967	ENSG00000054118.13		THRAP3		1		Interactome of polycomb repressive complex 2 (PRC2)	Transcriptional regulation of white adipocyte differentiation; PPARA activates gene expression	7	1.061	0.0152919	0.433092	0.92	8878.8	9469.1	3.6	2.45	High	High	High	High	High	High	1	Methyl [R660; Q664; K668; K670]
FALSE	High	Master Protein	P67870	Casein kinase II subunit beta	OS=Homo sapiens]		9	2	6	2	215	24.9	5.55	6.67	2	cell communication;cell organization and biogenesis;metabolic process;regulation of biological process;response to stimulus;transport	chromosome;cytoplasm;cytosol;extracellular;membrane;nucleus;organelle lumen	catalytic activity;enzyme regulator activity;metal ion binding;protein binding	Pf01214	1460	ENSG00000224774.7; ENSG00000230700.9; ENSG00000206406.9; ENSG00000204435.13; ENSG00000232960.10; ENSG00000224398.7; ENSG00000228875.8		CSNK2B		6; CHR_HSCHR6_MHC_SSTO_CTG1; CHR_HSCHR6_MHC_DBB_CTG1; CHR_HSCHR6_MHC_QBL_CTG1; CHR_HSCHR6_MHC_MANN_CTG1; CHR_HSCHR6_MHC_MCF_CTG1; CHR_HSCHR6_MHC_COX_CTG1	Measles; NF-kappa B signaling pathway; Tight junction; Herpes simplex infection; Wnt signaling pathway; Epstein-Barr virus infection; Adherens junction; Ribosome biogenesis in eukaryotes		WNT mediated activation of DVL; Condensation of Prometaphase Chromosomes; Regulation of PTEN stability and activity; Cooperation of PDCL (PhLP1) and TRiC/CCT in G-protein beta folding; Signal transduction by L1; RUNX1 interacts with co-factors whose precise effect on RUNX1 targets is not known; Synthesis of PC; Neutrophil degranulation; Receptor Mediated Mitophagy; Regulation of TP53 Activity thr…	47	1.07	0.0208994	0.444234	2.58	1196.5	1287.3	2.72	1.06	High	High	High	High	High	High	1
FALSE	High	Master Protein	Q96KR1	Zinc finger RNA-binding protein	OS=Homo sapiens]		12	9	11	9	1074	116.9	9.04	26.43	9	development	chromosome;cytoplasm;nucleus	DNA binding;metal ion binding;protein binding;RNA binding	Pf07528, Pf12171, Pf12874	51663	ENSG00000056097.15		ZFR		5		Exercise-induced Circadian Regulation		1	1.074	0.021582	0.444234	1.63	1827.6	1941.8	5.36	4.21	High	High	High	High	High	High	1
FALSE	High	Master Protein	O75955	Flotillin-1	OS=Homo sapiens]		22	7	8	7	427	47.3	7.49	20.57	7	cell organization and biogenesis;regulation of biological process;response to stimulus;transport	cytoskeleton;endosome;membrane	protein binding	Pf01145	10211	ENSG00000206379.12; ENSG00000230143.9; ENSG00000137312.14; ENSG00000206480.11; ENSG00000232280.9		FLOT1		6; CHR_HSCHR6_MHC_DBB_CTG1; CHR_HSCHR6_MHC_SSTO_CTG1; CHR_HSCHR6_MHC_QBL_CTG1; CHR_HSCHR6_MHC_COX_CTG1	Insulin signaling pathway	Angiopoietin Like Protein 8 Regulatory Pathway; Insulin Signaling	Synaptic adhesion-like molecules	6	1.077	0.0534639	0.479125	3.57	1994.2	2146.4	2.85	3.36	High	High	High	High	High	High	1
FALSE	High	Master Protein	O00401	Neural Wiskott-Aldrich syndrome protein	OS=Homo sapiens]		5	2	2	2	505	54.8	7.93	4.11	2	cell division;cell organization and biogenesis;cellular component movement;metabolic process;regulation of biological process;response to stimulus;transport	cytoplasm;cytoskeleton;cytosol;membrane;nucleus	catalytic activity;enzyme regulator activity;protein binding	Pf00568, Pf00786, Pf02205	8976; 142685	ENSG00000106299.7		WASL; ASB15		7	Endocytosis; Fc gamma R-mediated phagocytosis; Salmonella infection; Regulation of actin cytoskeleton; Pathogenic Escherichia coli infection; Chemokine signaling pathway; Bacterial invasion of epithelial cells; Adherens junction; Choline metabolism in cancer; Shigellosis	Pathogenic Escherichia coli infection; Factors and pathways affecting insulin-like growth factor (IGF1)-Akt signaling; Chemokine signaling pathway; G13 Signaling Pathway	Nephrin family interactions; DCC mediated attractive signaling; EPHB-mediated forward signaling; Clathrin-mediated endocytosis; RHO GTPases Activate WASPs and WAVEs; NOSTRIN mediated eNOS trafficking; Regulation of actin dynamics for phagocytic cup formation	37	1.078	0.0165269	0.433092	0.73	114	122.9	14.33	11.24	High	High	High	High	High	High	1
FALSE	High	Master Protein	O15305	Phosphomannomutase 2	OS=Homo sapiens]		32	8	12	8	246	28.1	6.77	13.88	8	metabolic process;transport	cytoplasm;cytosol;nucleus	catalytic activity;protein binding	Pf03332, Pf08282	5373	ENSG00000140650.11		PMM2		16	Metabolic pathways; Amino sugar and nucleotide sugar metabolism; Fructose and mannose metabolism		Defective PMM2 causes PMM2-CDG (CDG-1a); Synthesis of GDP-mannose	13	1.08	0.0217605	0.444234	1.71	1160.4	1268.2	2.94	4.23	High	High	High	High	High	High	1
FALSE	High	Master Protein	Q13885	Tubulin beta-2A chain	OS=Homo sapiens]		60	22	197	3	445	49.9	4.89	543.96	22	cell organization and biogenesis	cytoplasm;cytoskeleton;nucleus	catalytic activity;nucleotide binding;protein binding;structural molecule activity	Pf00091, Pf03953, Pf10644	7280	ENSG00000137267.5		TUBB2A		6	Gap junction; Phagosome; Pathogenic Escherichia coli infection	Pathogenic Escherichia coli infection; Parkin-Ubiquitin Proteasomal System pathway	COPI-independent Golgi-to-ER retrograde traffic; COPI-dependent Golgi-to-ER retrograde traffic; Carboxyterminal post-translational modifications of tubulin; Recruitment of NuMA to mitotic centrosomes; Hedgehog 'off' state; Translocation of GLUT4 to the plasma membrane; Prefoldin mediated transfer of substrate to CCT/TriC; Microtubule-dependent trafficking of connexons from Golgi to the plasma mem…	65	1.081	0.0447707	0.478123	2.88	818.6	918.8	9.27	9.27	High	High	High	High	High	High	1
FALSE	High	Master Protein	P55769	NHP2-like protein 1	OS=Homo sapiens]		47	7	19	7	128	14.2	8.46	35.95	7	cell organization and biogenesis;metabolic process	nucleus;spliceosomal complex	protein binding;RNA binding	Pf01248	4809	ENSG00000100138.13		NHP2L1; SNU13		22	Spliceosome; Ribosome biogenesis in eukaryotes	mRNA Processing	Major pathway of rRNA processing in the nucleolus and cytosol; rRNA modification in the nucleus and cytosol; mRNA Splicing - Major Pathway; mRNA Splicing - Minor Pathway	12	1.082	0.00462045	0.433092	1.06	7338.6	7942	2.1	2.82	High	High	High	High	High	High	1
FALSE	High	Master Protein	P21926	CD9 antigen	OS=Homo sapiens]		20	3	12	3	228	25.4	7.15	25.12	3	cell organization and biogenesis;cellular component movement;metabolic process;regulation of biological process;response to stimulus;transport	cell surface;membrane	protein binding	Pf00335	928	ENSG00000010278.12		CD9		12	Hematopoietic cell lineage		Platelet degranulation ; Sperm:Oocyte Membrane Binding; Uptake and function of diphtheria toxin	12	1.087	0.0309234	0.46361	0.55	3990.6	4322.6	2.46	4.84	High	High	High	High	High	High	1
FALSE	High	Master Protein	O14684	Prostaglandin E synthase	OS=Homo sapiens]		12	2	6	2	152	17.1	9.5	7.56	2	defense response;metabolic process;regulation of biological process;response to stimulus	cytoplasm;membrane	catalytic activity		9536	ENSG00000148344.10		PTGES		9	Arachidonic acid metabolism; Metabolic pathways	Eicosanoid Synthesis	Synthesis of Prostaglandins (PG) and Thromboxanes (TX)	8	1.093	0.00172539	0.433092	0.5	1806.9	1975.4	1.13	1.64	High	High	High	High	High	High	1
FALSE	High	Master Protein	Q9NVX2	Notchless protein homolog 1	OS=Homo sapiens]		18	6	6	6	485	53.3	7.34	9.42	6	cell differentiation;cell organization and biogenesis;regulation of biological process;response to stimulus	nucleus;ribosome	protein binding	Pf00400, Pf08154, Pf11715	54475	ENSG00000073536.17		NLE1		17				0	1.094	0.0386636	0.46361	0.16	764.3	836.1	5.07	2.7	High	High	High	High	High	High	1
FALSE	High	Master Protein	P55209	Nucleosome assembly protein 1-like 1	OS=Homo sapiens]		24	11	36	9	391	45.3	4.46	86.03	11	cell organization and biogenesis;metabolic process;regulation of biological process	membrane;nucleus	protein binding;RNA binding	Pf00956	4673	ENSG00000187109.13		NAP1L1		12				0	1.094	0.0460573	0.478123	0.78	4863.8	5640.4	5.1	3.8	High	High	High	High	High	High	1
FALSE	High	Master Protein	Q9H307	Pinin	OS=Homo sapiens]		7	4	4	4	717	81.6	7.14	2.65	4	metabolic process;regulation of biological process	membrane;nucleus;spliceosomal complex	DNA binding;protein binding;RNA binding;structural molecule activity	Pf04696, Pf04697	5411			PNN		14	mRNA surveillance pathway; RNA transport			2	1.096	0.0374844	0.46361	0.97	1050.2	1224	7.42	6.92	High	High	High	High	High	High	1
FALSE	High	Master Protein	P00558	phosphoglycerate kinase 1	OS=Homo sapiens]		80	38	305	38	417	44.6	8.1	785.99	38	cell differentiation;metabolic process;regulation of biological process;response to stimulus	cytoplasm;cytosol;membrane	catalytic activity;nucleotide binding;protein binding	Pf00162	5230	ENSG00000102144.13		PGK1		X	HIF-1 signaling pathway; Glycolysis / Gluconeogenesis; Metabolic pathways; Carbon metabolism; Biosynthesis of amino acids	Cori Cycle; Photodynamic therapy-induced HIF-1 survival signaling; Glycolysis and Gluconeogenesis	Gluconeogenesis; Glycolysis	13	1.097	0.0460228	0.478123	0.75	106074	120307	8.04	5.6	High	High	High	High	High	High	1
FALSE	High	Master Protein	P32320	cytidine deaminase	OS=Homo sapiens]		64	6	18	6	146	16.2	6.92	47.65	6	cell organization and biogenesis;metabolic process;regulation of biological process;response to stimulus;transport	cytosol;extracellular;organelle lumen	catalytic activity;metal ion binding;protein binding	Pf00383, Pf08211, Pf14421	978	ENSG00000158825.5		CDA		1	Metabolic pathways; Drug metabolism - other enzymes; Pyrimidine metabolism	Fluoropyrimidine Activity	Pyrimidine salvage; Neutrophil degranulation	11	1.1	0.0111233	0.433092	2.42	3150.2	3407.4	5.21	4.37	High	High	High	High	High	High	1
FALSE	High	Master Protein	Q13404	Ubiquitin-conjugating enzyme E2 variant 1	OS=Homo sapiens]		50	8	14	4	147	16.5	7.93	14.51	8	cell differentiation;metabolic process;regulation of biological process;response to stimulus	cytoplasm;cytosol;nucleus	catalytic activity;protein binding	Pf00179	7335; 387522	ENSG00000244687.11		UBE2V1; TMEM189-UBE2V1		20		IL-1 signaling pathway; Interleukin-1 Induced Activation of NF-kappa-B; Simplified Depiction of MYD88 Distinct Input-Output Pathway	IRAK1 recruits IKK complex upon TLR7/8 or 9 stimulation; Downstream TCR signaling; NOD1/2 Signaling Pathway; IKK complex recruitment mediated by RIP1; TICAM1, RIP1-mediated IKK complex recruitment ; TAK1 activates NFkB by phosphorylation and activation of IKKs complex; Antigen processing: Ubiquitination & Proteasome degradation; FCERI mediated NF-kB activation; Activated TLR4 signalling; Interleu…	46	1.1	0.0317009	0.46361	1.16	801.3	881.7	3.33	6.24	High	High	High	High	High	High	1
FALSE	High	Master Protein	P0C7U0	Protein ELFN1	OS=Homo sapiens]		3	2	2	2	828	90.4	8.37	2.14	2	cell organization and biogenesis;regulation of biological process	membrane	enzyme regulator activity;protein binding	Pf12799, Pf13306, Pf13855	392617	ENSG00000225968.7		ELFN1		7				0	1.101	0.0272453	0.46361	2.87	194.4	209.9	7.2	4.22	High	High	High	High	High	High	1	Phospho [Y499(100)]
FALSE	High	Master Protein	Q96PU8	protein quaking	OS=Homo sapiens]		7	2	4	2	341	37.6	8.56	5.43	2	cell differentiation;development;metabolic process;regulation of biological process;transport	cytoplasm;nucleus	protein binding;RNA binding	Pf00013, Pf13014	9444	ENSG00000112531.16		QKI		6		Exercise-induced Circadian Regulation	Signaling by BRAF and RAF fusions	5	1.108	0.0347487	0.46361	2.28	413.4	465.5	10.05	8.31	High	High	High	High	High	High	1
FALSE	High	Master Protein	Q15031	Probable Leucine--tRNA ligase, mitochondrial	OS=Homo sapiens]		8	5	8	5	903	101.9	8.22	17.85	5	cell organization and biogenesis;metabolic process;regulation of biological process	mitochondrion;organelle lumen	catalytic activity;nucleotide binding	Pf00133, Pf08264, Pf09334, Pf13603	23395	ENSG00000011376.9		LARS2		3	Aminoacyl-tRNA biosynthesis	Amino Acid metabolism	Mitochondrial tRNA aminoacylation	6	1.112	0.0201053	0.444234	1.78	1311	1508.8	6.47	7.53	High	High	High	High	High	High	1
FALSE	High	Master Protein	P00441	Superoxide dismutase	Cu-Zn]	OS=Homo sapiens]	97	13	37	13	154	15.9	6.13	108.66	13	cell organization and biogenesis;cellular component movement;cellular homeostasis;metabolic process;regulation of biological process;response to stimulus;transport	cytoplasm;cytosol;extracellular;membrane;mitochondrion;nucleus;organelle lumen;vacuole	antioxidant activity;catalytic activity;metal ion binding;protein binding	Pf00080	6647	ENSG00000142168.14		SOD1		21	Amyotrophic lateral sclerosis (ALS); Longevity regulating pathway - multiple species; Huntington's disease; Peroxisome; Prion diseases	Selenium Micronutrient Network; Vitamin B12 Metabolism; Folate Metabolism; AGE/RAGE pathway; Dopamine metabolism; Amyotrophic lateral sclerosis (ALS); Copper homeostasis; Association Between Physico-Chemical Features and Toxicity Associated Pathways; One carbon metabolism and related pathways; Oxidative Stress	Platelet degranulation ; Gene and protein expression by JAK-STAT signaling after Interleukin-12 stimulation; Interleukin-12 family signaling; Detoxification of Reactive Oxygen Species	27	1.113	0.000470264	0.277671	0	12068.4	13436.4	5.62	4.76	High	High	High	High	High	High	1
FALSE	High	Master Protein	P35241-1	radixin	OS=Homo sapiens]		54	34	77	19	583	68.5	6.37	107.96	34	cell organization and biogenesis;regulation of biological process;response to stimulus	cytoplasm;cytoskeleton;membrane	protein binding;RNA binding	Pf00373, Pf00769, Pf09379, Pf09380	5962	ENSG00000137710.14		RDX		11	Regulation of actin cytoskeleton; Proteoglycans in cancer; MicroRNAs in cancer	Regulation of Actin Cytoskeleton	Recycling pathway of L1	8	1.114	0.0530249	0.479125	4.95	7784.6	9220.1	9.07	5.67	High	High	High	High	High	High	1
FALSE	High	Master Protein	Q9NWH9-1	SAFB-like transcription modulator	OS=Homo sapiens]		6	6	8	6	1034	117.1	7.87	15.75	6	cell death;metabolic process;regulation of biological process	nucleus	DNA binding;RNA binding	Pf00076, Pf02037, Pf13893, Pf14259	79811	ENSG00000137776.16		SLTM		15				0	1.118	0.0307887	0.46361	4.98	1616.8	1746.6	10.55	8.79	High	High	High	High	High	High	1
FALSE	High	Master Protein	P68366	Tubulin alpha-4A chain	OS=Homo sapiens]		53	23	265	6	448	49.9	5.06	843.66	23	cell organization and biogenesis;regulation of biological process;transport	cytoplasm;cytoskeleton;cytosol;extracellular	catalytic activity;nucleotide binding;protein binding;structural molecule activity	Pf00091, Pf03953	7277	ENSG00000127824.13		TUBA4A		2	Phagosome; Pathogenic Escherichia coli infection; Apoptosis; Gap junction	Pathogenic Escherichia coli infection; Parkin-Ubiquitin Proteasomal System pathway	COPI-independent Golgi-to-ER retrograde traffic; COPI-dependent Golgi-to-ER retrograde traffic; Carboxyterminal post-translational modifications of tubulin; Regulation of PLK1 Activity at G2/M Transition; Recruitment of NuMA to mitotic centrosomes; Hedgehog 'off' state; Loss of Nlp from mitotic centrosomes; Translocation of GLUT4 to the plasma membrane; Prefoldin mediated transfer of substrate to…	76	1.12	0.00249269	0.433092	1.11	6536.5	7231.6	4.25	3.43	High	High	High	High	High	High	1	Methyl [Q285]
FALSE	High	Master Protein	P24666-1	Low molecular weight phosphotyrosine protein phosphatase	OS=Homo sapiens]		63	7	11	7	158	18	6.74	22.92	7	metabolic process	cytoplasm;cytosol;membrane	catalytic activity;protein binding	Pf01451	52	ENSG00000143727.15		ACP1		2	Adherens junction; Metabolic pathways; Thiamine metabolism	VEGFA-VEGFR2 Signaling Pathway		4	1.122	0.0452693	0.478123	2.37	2485.9	2788.9	8.24	6.5	High	High	High	High	High	High	1
FALSE	High	Master Protein	P40925	Malate dehydrogenase, cytoplasmic	OS=Homo sapiens]		45	12	45	12	334	36.4	7.36	90.93	12	metabolic process	cytoplasm;cytosol;mitochondrion	catalytic activity;nucleotide binding;protein binding	Pf00056, Pf02866	4190	ENSG00000014641.17		MDH1		2	Metabolic pathways; Carbon metabolism; Glyoxylate and dicarboxylate metabolism; Proximal tubule bicarbonate reclamation; Citrate cycle (TCA cycle); Cysteine and methionine metabolism; Pyruvate metabolism	Sterol Regulatory Element-Binding Proteins (SREBP) signalling; TCA Cycle and Deficiency of Pyruvate Dehydrogenase complex (PDHc); Amino Acid metabolism; Glycolysis and Gluconeogenesis	Gluconeogenesis	15	1.129	0.0115264	0.433092	1.12	11685.8	13188.7	3.91	1.69	High	High	High	High	High	High	1
FALSE	High	Master Protein	Q12904-1	aminoacyl tRNA synthase complex-interacting multifunctional protein 1	OS=Homo sapiens]		50	11	21	11	312	34.3	8.43	48.38	11	cell communication;cell death;cellular component movement;defense response;metabolic process;regulation of biological process;response to stimulus	cell surface;cytoplasm;cytosol;endoplasmic reticulum;extracellular;Golgi;membrane;nucleus	protein binding;RNA binding	Pf01588	9255	ENSG00000164022.16		AIMP1		4			Cytosolic tRNA aminoacylation; SeMet incorporation into proteins	8	1.13	0.0415071	0.46361	2.28	4046.2	4513.5	3.35	1.78	High	High	High	High	High	High	1
FALSE	High	Master Protein	P15559-1	NAD(P)H dehydrogenase	quinone] 1	OS=Homo sapiens]	36	9	22	9	274	30.8	8.88	73.83	9	cell communication;metabolic process;regulation of biological process;response to stimulus	cytoplasm;cytosol	antioxidant activity;catalytic activity;protein binding;RNA binding	Pf02525, Pf03358	1728	ENSG00000181019.12		NQO1		16	Ubiquinone and other terpenoid-quinone biosynthesis	Dopamine metabolism; Aryl Hydrocarbon Receptor; Apoptosis-related network due to altered Notch3 in ovarian cancer; Aryl Hydrocarbon Receptor Pathway; NRF2 pathway; Transcriptional activation by NRF2; Photodynamic therapy-induced NFE2L2 (NRF2) survival signaling; Simplified Interaction Map Between LOXL4 and Oxidative Stress Pathway; Benzene metabolism; Oxidative Stress; Estrogen metabolism	Regulation of ornithine decarboxylase (ODC)	16	1.131	0.00217381	0.433092	0.75	4772.3	5363.1	5.38	4.55	High	High	High	High	High	High	1
FALSE	High	Master Protein	Q9Y295	developmentally-regulated GTP-binding protein 1	OS=Homo sapiens]		28	7	10	7	367	40.5	8.9	23.08	7	development;metabolic process	cytoplasm;cytosol;membrane	nucleotide binding;protein binding	Pf00009, Pf01926, Pf02421, Pf02824	4733	ENSG00000185721.12		DRG1		22				0	1.133	0.022573	0.454062	3.61	1370.5	1547.9	3.51	4.33	High	High	High	High	High	High	1	Methyl [K22]; Phospho [T24(100)]
FALSE	High	Master Protein	P55795	heterogeneous nuclear ribonucleoprotein H2	OS=Homo sapiens]		42	17	55	6	449	49.2	6.3	172.97	17	metabolic process	cytosol;membrane;nucleus	protein binding;RNA binding	Pf00076, Pf08080, Pf14259	3188	ENSG00000126945.8		HNRNPH2		X		mRNA Processing	mRNA Splicing - Major Pathway	5	1.136	0.0294521	0.46361	5.44	3343.4	3797.7	1.79	2.03	High	High	High	High	High	High	1	Methyl [R233]
FALSE	High	Master Protein	O00567	Nucleolar protein 56	OS=Homo sapiens]		20	10	15	10	594	66	9.19	27.84	10	metabolic process	cytoplasm;membrane;nucleus	protein binding;RNA binding	Pf01798, Pf08060, Pf08156	10528	ENSG00000101361.16		NOP56		20	Ribosome biogenesis in eukaryotes		Major pathway of rRNA processing in the nucleolus and cytosol; Association of TriC/CCT with target proteins during biosynthesis; rRNA modification in the nucleus and cytosol	10	1.137	0.0160956	0.433092	3.98	2459.7	2706.3	4.2	3.23	High	High	High	High	High	High	1
FALSE	High	Master Protein	Q9H479	fructosamine-3-kinase	OS=Homo sapiens]		14	3	5	3	309	35.1	7.55	10.91	3	cell differentiation;metabolic process	cytosol	catalytic activity;enzyme regulator activity	Pf01636, Pf03881	64122	ENSG00000167363.13		FN3K		17			Gamma carboxylation, hypusine formation and arylsulfatase activation	3	1.137	0.0314686	0.46361	1.53	1709.4	1943.8	6.5	2.85	High	High	High	High	High	High	1
FALSE	High	Master Protein	Q5VW32	BRO1 domain-containing protein BROX	OS=Homo sapiens]		11	3	4	3	411	46.4	7.65	10.93	3		membrane	protein binding	Pf03097	148362	ENSG00000162819.11		BROX		1				0	1.141	0.0100411	0.433092	2.96	214	249.5	13.29	12.57	High	High	High	High	High	High	1
FALSE	High	Master Protein	P22087	rRNA 2'-O-methyltransferase fibrillarin	OS=Homo sapiens]		36	11	17	11	321	33.8	10.18	31.43	11	cell differentiation;cell organization and biogenesis;metabolic process	chromosome;membrane;nucleus	catalytic activity;protein binding;RNA binding	Pf01135, Pf01269, Pf13847	2091	ENSG00000280548.3; ENSG00000105202.8		FBL		19; CHR_HG2021_PATCH	Ribosome biogenesis in eukaryotes		Major pathway of rRNA processing in the nucleolus and cytosol; rRNA modification in the nucleus and cytosol	6	1.143	0.0373121	0.46361	5.78	2168.8	2478.8	5.12	0.4	High	High	High	High	High	High	1
FALSE	High	Master Protein	P55327	Tumor protein D52	OS=Homo sapiens]		38	6	19	6	224	24.3	4.83	47.47	6	cell differentiation;transport	cytoplasm;endoplasmic reticulum	metal ion binding;protein binding	Pf04201	7163	ENSG00000076554.15		TPD52		8			Golgi Associated Vesicle Biogenesis	5	1.146	0.0382212	0.46361	5.55	6611.5	8017	7.46	6.22	High	High	High	High	High	High	1
FALSE	High	Master Protein	Q9UPQ0-1	LIM and calponin homology domains-containing protein 1	OS=Homo sapiens]		5	4	5	4	1083	121.8	6.47	10.75	4	cell organization and biogenesis		metal ion binding;protein binding	Pf00307, Pf00412	22998	ENSG00000064042.17		LIMCH1		4				0	1.147	0.0308286	0.46361	4.18	1207.9	1341	9.18	11.49	High	High	High	High	High	High	1
FALSE	High	Master Protein	Q8NHV4	Protein NEDD1	OS=Homo sapiens]		3	1	1	1	660	71.9	7.97	5.88	1	cell division;regulation of biological process	cytoplasm;cytoskeleton;cytosol	protein binding	Pf00400, Pf02239	121441	ENSG00000139350.11		NEDD1		12			Regulation of PLK1 Activity at G2/M Transition; AURKA Activation by TPX2; Anchoring of the basal body to the plasma membrane; Recruitment of NuMA to mitotic centrosomes; Loss of Nlp from mitotic centrosomes; Recruitment of mitotic centrosome proteins and complexes	16	1.147	0.0524819	0.479125	4.21	56.8	64.6	8.61	4.08	High	High	High	High	High	High	1
FALSE	High	Master Protein	Q92536	Y+L amino acid transporter 2	OS=Homo sapiens]		6	1	1	1	515	56.8	5.88	4.8	1	cell organization and biogenesis;cellular component movement;metabolic process;transport	membrane	transporter activity	Pf00324, Pf13520	9057	ENSG00000103064.13		SLC7A6		16			Basigin interactions; Amino acid transport across the plasma membrane	7	1.151	0.0274649	0.46361	4.38	154.3	183.2	12.53	14.05	High	High	High	High	High	High	1
FALSE	High	Master Protein	Q9NR45	sialic acid synthase	OS=Homo sapiens]		41	13	26	13	359	40.3	6.74	62.33	13	metabolic process	cytoplasm;cytosol	catalytic activity	Pf03102, Pf08666	54187	ENSG00000095380.10		NANS		9	Amino sugar and nucleotide sugar metabolism; Metabolic pathways		Sialic acid metabolism	8	1.151	0.0365686	0.46361	6.5	8183.6	9415.3	4.89	0.36	High	High	High	High	High	High	1
FALSE	High	Master Protein	Q9Y223-1	bifunctional UDP-N-acetylglucosamine 2-epimerase/N-acetylmannosamine kinase	OS=Homo sapiens]		12	7	8	7	722	79.2	6.8	11.33	7	metabolic process	cytoplasm;cytosol	catalytic activity;metal ion binding;nucleotide binding;protein binding	Pf00370, Pf00480, Pf02350, Pf07085	10020	ENSG00000159921.14		GNE		9	Metabolic pathways; Amino sugar and nucleotide sugar metabolism		Sialic acid metabolism; Defective GNE causes sialuria, Nonaka myopathy and inclusion body myopathy 2	12	1.153	0.0240517	0.46361	3.23	458.3	528.5	8.88	4.17	High	High	High	High	High	High	1
FALSE	High	Master Protein	O95376	E3 ubiquitin-protein ligase ARIH2	OS=Homo sapiens]		3	1	4	1	493	57.8	5.63	12.37	1	cell growth;cell proliferation;development;metabolic process;regulation of biological process	cytoplasm;nucleus	catalytic activity;metal ion binding;protein binding	Pf01485	10425	ENSG00000177479.19		ARIH2		3			Antigen processing: Ubiquitination & Proteasome degradation	4	1.153	0.0302143	0.46361	1.17	146.5	164.8	1.96	2.95	High	High	High	High	High	High	1
FALSE	High	Master Protein	Q96JJ7-1	Protein disulfide-isomerase TMX3	OS=Homo sapiens]		2	1	1	1	454	51.8	4.91	2.97	1	cellular homeostasis;metabolic process;regulation of biological process;response to stimulus;transport	cell surface;endoplasmic reticulum;membrane	catalytic activity;metal ion binding;protein binding	Pf00085, Pf01216, Pf13098, Pf13848, Pf13899	54495	ENSG00000166479.9		TMX3		18			Platelet degranulation	4	1.155	0.0478211	0.479125	8.42	305.1	382	19.09	13.74	High	High	High	High	High	High	1
FALSE	High	Master Protein	Q9NZI8	Insulin-like growth factor 2 mRNA-binding protein 1	OS=Homo sapiens]		24	12	29	10	577	63.4	9.2	60.93	12	cell proliferation;regulation of biological process;transport	cytoplasm;cytosol;nucleus	protein binding;RNA binding;translation regulator activity	Pf00013, Pf00076, Pf13014, Pf13893, Pf14259	10642	ENSG00000159217.9		IGF2BP1		17	MicroRNAs in cancer	Brain-Derived Neurotrophic Factor (BDNF) signaling pathway; eIF5A regulation in response to inhibition of the nuclear export system	MAPK6/MAPK4 signaling; Insulin-like Growth Factor-2 mRNA Binding Proteins (IGF2BPs/IMPs/VICKZs) bind RNA	8	1.158	0.0336673	0.46361	0.19	3415.4	3698.3	4.64	5.36	High	High	High	High	High	High	1
FALSE	High	Master Protein	O60888-1	Protein CutA	OS=Homo sapiens]		16	2	10	2	179	19.1	5.5	13.37	2	response to stimulus	membrane	metal ion binding;protein binding	Pf03091	51596	ENSG00000112514.15; ENSG00000226492.7		CUTA		6; CHR_HSCHR6_MHC_SSTO_CTG1				0	1.163	0.0119236	0.433092	0.87	1561.2	1812.4	0.8	2.92	High	High	High	High	High	High	1
FALSE	High	Master Protein	Q8IZP0	abl interactor 1	OS=Homo sapiens]		3	1	1	1	508	55	7.06	2.83	1	cell organization and biogenesis;cellular component movement;metabolic process;regulation of biological process;response to stimulus	cytoplasm;cytoskeleton;cytosol;endoplasmic reticulum;membrane;nucleus	enzyme regulator activity;protein binding	Pf00018, Pf07653, Pf07815, Pf14604	10006	ENSG00000136754.16		ABI1		10		EGF/EGFR Signaling Pathway	Regulation of actin dynamics for phagocytic cup formation; VEGFA-VEGFR2 Pathway; RHO GTPases Activate WASPs and WAVEs	12	1.163	0.0478411	0.479125	8.38	155.7	180.2	4.92	4.22	High	High	High	High	High	High	1
FALSE	High	Master Protein	P68402-1	platelet-activating factor acetylhydrolase IB subunit beta	OS=Homo sapiens]		8	1	4	1	229	25.6	5.92	13.53	1	metabolic process;regulation of biological process;transport	cytoplasm;cytosol;extracellular;membrane;organelle lumen	catalytic activity;protein binding	Pf00657, Pf13472	5049	ENSG00000168092.13		PAFAH1B2		11	Ether lipid metabolism; Metabolic pathways		COPI-independent Golgi-to-ER retrograde traffic; Neutrophil degranulation	10	1.168	0.0480063	0.479125	5.85	769.1	927.7	3.46	7.81	High	High	High	High	High	High	1
FALSE	High	Master Protein	P53007	Tricarboxylate transport protein, mitochondrial	OS=Homo sapiens]		9	3	4	3	311	34	9.89	7.44	3	metabolic process;transport	membrane;mitochondrion;nucleus	transporter activity	Pf00153	6576	ENSG00000100075.9		SLC25A1		22			Gluconeogenesis; Fatty acyl-CoA biosynthesis	7	1.169	0.0411568	0.46361	0.63	1010.4	1175.7	9.35	12.65	High	High	High	High	High	High	1
FALSE	High	Master Protein	O15121	Sphingolipid delta(4)-desaturase DES1	OS=Homo sapiens]		5	1	1	1	323	37.8	7.46	4.52	1	metabolic process;transport	endoplasmic reticulum;membrane;mitochondrion	catalytic activity	Pf00487, Pf08557	8560	ENSG00000143753.12		DEGS1		1	Sphingolipid metabolism; Metabolic pathways; Sphingolipid signaling pathway		Neutrophil degranulation; Sphingolipid de novo biosynthesis	10	1.171	0.0317957	0.46361	3.32	103.8	121.5	15.65	17.98	High	High	High	High	High	High	1
FALSE	High	Master Protein	P05026	Sodium/potassium-transporting ATPase subunit beta-1	OS=Homo sapiens]		17	5	7	5	303	35	8.53	21.86	5	cell communication;cell organization and biogenesis;cellular component movement;cellular homeostasis;metabolic process;regulation of biological process;response to stimulus;transport	membrane	catalytic activity;enzyme regulator activity;metal ion binding;nucleotide binding;protein binding;transporter activity	Pf00287	481	ENSG00000143153.12		ATP1B1		1	Thyroid hormone synthesis; Thyroid hormone signaling pathway; Mineral absorption; Endocrine and other factor-regulated calcium reabsorption; Salivary secretion; Aldosterone-regulated sodium reabsorption; Adrenergic signaling in cardiomyocytes; Proximal tubule bicarbonate reclamation; Cardiac muscle contraction; cGMP-PKG signaling pathway; Carbohydrate digestion and absorption; cAMP signaling path…	Calcium Regulation in the Cardiac Cell	Ion homeostasis; Basigin interactions; Ion transport by P-type ATPases	27	1.173	0.0113817	0.433092	2.82	2619.2	3130.6	5.96	3.18	High	High	High	High	High	High	1
FALSE	High	Master Protein	Q8IZL8	Proline-, glutamic acid- and leucine-rich protein 1	OS=Homo sapiens]		5	4	5	4	1130	119.6	4.34	9.45	4	metabolic process;regulation of biological process;response to stimulus	cytoplasm;membrane;nucleus	protein binding;RNA binding	Pf08166, Pf08167	27043	ENSG00000141456.14		PELP1		17			Major pathway of rRNA processing in the nucleolus and cytosol; PTK6 Expression	8	1.178	0.00310443	0.433092	2.83	1342.8	1558.2	9.69	7.08	High	High	High	High	High	High	1
FALSE	High	Master Protein	Q9H9B4	Sideroflexin-1	OS=Homo sapiens]		22	5	6	4	322	35.6	9.07	8.2	5	cell differentiation;transport	membrane;mitochondrion	transporter activity	Pf03820	94081	ENSG00000164466.12		SFXN1		5				0	1.179	0.0429614	0.467006	8.57	1803.7	2156.8	6.88	6.19	High	High	High	High	High	High	1
FALSE	High	Master Protein	Q9Y383	Putative RNA-binding protein Luc7-like 2	OS=Homo sapiens]		37	17	33	12	392	46.5	10.01	74.35	17	cell organization and biogenesis	nucleus;spliceosomal complex	protein binding;RNA binding	Pf03194	51631	ENSG00000146963.17		LUC7L2		7				0	1.183	0.019687	0.438341	5.53	5698.9	6739.8	2.64	1.85	High	High	High	High	High	High	1
FALSE	High	Master Protein	P29692	Elongation factor 1-delta	OS=Homo sapiens]		41	9	31	1	281	31.1	5.01	83.42	9	metabolic process;regulation of biological process;response to stimulus	cytoplasm;cytosol;endoplasmic reticulum;nucleus	DNA binding;protein binding;RNA binding;signal transducer activity	Pf00736, Pf10587	1936	ENSG00000104529.17; ENSG00000273594.4		EEF1D		8; CHR_HSCHR8_3_CTG7	Herpes simplex infection	Translation Factors	Eukaryotic Translation Elongation	5	1.183	0.030466	0.46361	3.15	1817.9	2147.1	4	8.49	High	High	High	High	High	High	1
FALSE	High	Master Protein	Q86U42-1	polyadenylate-binding protein 2	OS=Homo sapiens]		22	5	7	5	306	32.7	5.06	14.49	5	metabolic process;regulation of biological process;response to stimulus;transport	cytoplasm;nucleus	protein binding;RNA binding	Pf00076, Pf13893, Pf14259	8106	ENSG00000100836.10		PABPN1		14	Influenza A; mRNA surveillance pathway	mRNA Processing	Inhibition of Host mRNA Processing and RNA Silencing; mRNA 3'-end processing; mRNA Splicing - Major Pathway; Cleavage of Growing Transcript in the Termination Region ; Processing of Intronless Pre-mRNAs	20	1.186	0.0534276	0.479125	5.68	764.1	857	6.02	5.75	High	High	High	High	High	High	1
FALSE	High	Master Protein	P30825	High affinity cationic amino acid transporter 1	OS=Homo sapiens]		5	3	5	3	629	67.6	5.43	7.75	3	transport	membrane	protein binding;transporter activity	Pf00324, Pf13520, Pf13906	6541	ENSG00000139514.12		SLC7A1		13	MicroRNAs in cancer		Amino acid transport across the plasma membrane	5	1.19	0.0355871	0.46361	7.37	787.7	937.2	4.39	2.22	High	High	High	High	High	High	1
FALSE	High	Master Protein	O95372	acyl-protein thioesterase 2	OS=Homo sapiens]		31	6	8	6	231	24.7	7.23	19.03	6	cellular component movement;metabolic process	cytoplasm;cytosol	catalytic activity;protein binding	Pf00561, Pf02230, Pf03959, Pf07859, Pf12695, Pf12697	11313	ENSG00000011009.10		LYPLA2		1	Glycerophospholipid metabolism		L1CAM interactions	4	1.192	0.00526219	0.433092	3.18	2428.9	2956.2	6.15	5.42	High	High	High	High	High	High	1
FALSE	High	Master Protein	Q8NBI5	Solute carrier family 43 member 3	OS=Homo sapiens]		3	1	3	1	491	54.5	8.53	5.21	1	transport	membrane			29015	ENSG00000134802.17		SLC43A3		11				0	1.193	0.0220156	0.444234	5.71	240.8	271.5	6.77	5.49	High	High	High	High	High	High	1
FALSE	High	Master Protein	Q7LGC8	Carbohydrate sulfotransferase 3	OS=Homo sapiens]		3	1	1	1	479	54.7	8.59	2.84	1	metabolic process	Golgi;membrane	catalytic activity	Pf00685	9469	ENSG00000122863.5		CHST3		10	Glycosaminoglycan biosynthesis - chondroitin sulfate / dermatan sulfate	Metapathway biotransformation	Defective CHST3 causes SEDCJD; Chondroitin sulfate biosynthesis	11	1.194	0.0371099	0.46361	9.92	78.1	93.2	11.32	3.94	High	High	High	High	High	High	1
FALSE	High	Master Protein	Q9NPE3	H/ACA ribonucleoprotein complex subunit 3	OS=Homo sapiens]		84	6	7	6	64	7.7	9.99	14.09	6	cell organization and biogenesis;metabolic process	nucleus	protein binding;RNA binding	Pf04135	55505	ENSG00000182117.5		NOP10		15	Ribosome biogenesis in eukaryotes		rRNA modification in the nucleus and cytosol	5	1.196	0.0297553	0.46361	6.99	2275	2718	9.57	2.77	High	High	High	High	High	High	1
FALSE	High	Master Protein	Q9UQ80	proliferation-associated protein 2G4	OS=Homo sapiens]		54	23	86	23	394	43.8	6.55	171.37	23	cell proliferation;metabolic process;regulation of biological process;transport	cytoplasm;extracellular;membrane;nucleus;organelle lumen	DNA binding;protein binding;RNA binding	Pf00557	5036	ENSG00000170515.13		PA2G4		12			Neutrophil degranulation	3	1.196	0.0493825	0.479125	4.57	27291.8	31152.4	3.83	4.93	High	High	High	High	High	High	1
FALSE	High	Master Protein	P16278	Beta-galactosidase	OS=Homo sapiens]		6	3	4	3	677	76	6.57	5.33	3	metabolic process;response to stimulus;transport	cytoplasm;extracellular;Golgi;organelle lumen;vacuole	catalytic activity;protein binding	Pf01301, Pf02449, Pf13364	2720			GLB1		3	Galactose metabolism; Other glycan degradation; Lysosome; Glycosaminoglycan degradation; Glycosphingolipid biosynthesis - ganglio series; Metabolic pathways; Sphingolipid metabolism	Ectoderm Differentiation	Sialic acid metabolism; Neutrophil degranulation; MPS IV - Morquio syndrome B; Glycosphingolipid metabolism; HS-GAG degradation; Keratan sulfate degradation	32	1.198	0.0183058	0.433092	5.45	378.8	443.7	1.4	3.96	High	High	High	High	High	High	1
FALSE	High	Master Protein	O00422	Histone deacetylase complex subunit SAP18	OS=Homo sapiens]		8	2	6	2	153	17.6	9.35	16.13	2	cell organization and biogenesis;metabolic process;regulation of biological process	cytoplasm;cytosol;nucleus	catalytic activity;protein binding;RNA binding	Pf06487	10284	ENSG00000150459.12		SAP18		13	mRNA surveillance pathway; RNA transport	Hedgehog Signaling Pathway	HDACs deacetylate histones; NoRC negatively regulates rRNA expression	10	1.207	0.038382	0.46361	7.08	1728.3	2243.1	7.68	10.36	High	High	High	High	High	High	1
FALSE	High	Master Protein	Q16881-1	Thioredoxin reductase 1, cytoplasmic	OS=Homo sapiens]		47	23	71	22	649	70.9	7.39	191.33	23	cell proliferation;cellular homeostasis;metabolic process;regulation of biological process;response to stimulus;transport	cytoplasm;cytosol;mitochondrion;nucleus	antioxidant activity;catalytic activity;nucleotide binding;protein binding	Pf00070, Pf00462, Pf02852, Pf07992, Pf13738	7296	ENSG00000198431.15		TXNRD1		12	Selenocompound metabolism; Pyrimidine metabolism	Selenium Micronutrient Network; Selenium Metabolism and Selenoproteins; NRF2 pathway; Oxidative Stress	Metabolism of ingested MeSeO2H into MeSeH; Uptake and function of diphtheria toxin; Interconversion of nucleotide di- and triphosphates; TP53 Regulates Metabolic Genes; PPARA activates gene expression; Detoxification of Reactive Oxygen Species; Metabolism of ingested H2SeO4 and H2SeO3 into H2Se	28	1.209	0.0048711	0.433092	3.08	11376.2	13758.6	0.68	1.55	High	High	High	High	High	High	1
FALSE	High	Master Protein	Q8NC42	E3 ubiquitin-protein ligase RNF149	OS=Homo sapiens]		3	1	1	1	400	43.1	6.54	3.21	1	metabolic process;regulation of biological process;response to stimulus	membrane	catalytic activity;metal ion binding;protein binding	Pf00097, Pf02225, Pf12678, Pf13639, Pf13920, Pf13923, Pf14634	284996	ENSG00000163162.8		RNF149		2				0	1.213	0.0129658	0.433092	0.39	338.2	423.1	4.89	2.53	High	High	High	High	High	High	1
FALSE	High	Master Protein	Q6ZRP7	Sulfhydryl oxidase 2	OS=Homo sapiens]		12	7	10	7	698	77.5	7.72	20.79	7	cellular homeostasis;metabolic process;regulation of biological process	extracellular;Golgi;membrane;nucleus	catalytic activity	Pf00085, Pf04777	169714	ENSG00000165661.16		QSOX2		9				0	1.223	0.0102485	0.433092	2.66	1928.2	2440	7.43	8.62	High	High	High	High	High	High	1
FALSE	High	Master Protein	Q9P258	Protein RCC2	OS=Homo sapiens]		31	11	17	11	522	56	8.78	39.87	11	cell division;cell organization and biogenesis;regulation of biological process;response to stimulus	chromosome;cytoplasm;cytoskeleton;cytosol;membrane;nucleus	protein binding;RNA binding	Pf00415, Pf13540	55920	ENSG00000281540.2; ENSG00000179051.13		RCC2		1; CHR_HG2095_PATCH			Amplification of signal from unattached kinetochores via a MAD2 inhibitory signal; Separation of Sister Chromatids; Resolution of Sister Chromatid Cohesion; RHO GTPases Activate Formins	16	1.224	0.0247838	0.46361	4.56	2344.9	2783.1	12.45	7.53	High	High	High	High	High	High	1
FALSE	High	Master Protein	P05198	Eukaryotic translation initiation factor 2 subunit 1	OS=Homo sapiens]		30	8	16	8	315	36.1	5.08	22.74	8	cell communication;metabolic process;regulation of biological process;response to stimulus;transport	cytoplasm;cytosol;membrane;nucleus;ribosome	protein binding;RNA binding	Pf00575, Pf07541	1965	ENSG00000134001.12		EIF2S1		14	Influenza A; Measles; Apoptosis; Hepatitis C; RNA transport; Protein processing in endoplasmic reticulum; Herpes simplex infection; Non-alcoholic fatty liver disease (NAFLD)	Translation Factors; Brain-Derived Neurotrophic Factor (BDNF) signaling pathway	Formation of the ternary complex, and subsequently, the 43S complex; L13a-mediated translational silencing of Ceruloplasmin expression; ABC-family proteins mediated transport; Translation initiation complex formation; PERK regulates gene expression; GTP hydrolysis and joining of the 60S ribosomal subunit; Recycling of eIF2:GDP; Ribosomal scanning and start codon recognition	25	1.224	0.0496965	0.479125	7.58	3122.5	3961.2	2.7	7.28	High	High	High	High	High	High	1
FALSE	Low	Master Protein	Q14674-1	Separin	OS=Homo sapiens]		0	1	1	1	2120	233	7.55	0	1	cell death;cell organization and biogenesis;metabolic process;regulation of biological process	cytoplasm;cytosol;nucleus	catalytic activity;protein binding	Pf03568	9700	ENSG00000135476.11		ESPL1		12	Oocyte meiosis; Cell cycle	Cell Cycle	Separation of Sister Chromatids	9	1.231	0.0217908	0.444234	0.17	111.7	153	6.46	6.26	High	High	High	High	High	High	1
FALSE	High	Master Protein	O43264	Centromere/kinetochore protein zw10 homolog	OS=Homo sapiens]		5	3	3	3	779	88.8	6.27	2.17	3	cell division;cell organization and biogenesis;regulation of biological process;transport	chromosome;cytoplasm;cytoskeleton;cytosol;endoplasmic reticulum;membrane;nucleus	DNA binding;protein binding	Pf06248	9183	ENSG00000086827.8		ZW10		11			COPI-dependent Golgi-to-ER retrograde traffic; Amplification of signal from unattached kinetochores via a MAD2 inhibitory signal; Separation of Sister Chromatids; Resolution of Sister Chromatid Cohesion; RHO GTPases Activate Formins	21	1.239	0.0260649	0.46361	12.62	26.7	33.1	32.92	23.28	High	High	High	High	High	High	1
FALSE	High	Master Protein	Q9NW64-1	Pre-mRNA-splicing factor RBM22	OS=Homo sapiens]		7	3	3	3	420	46.9	8.54	0	3	cell organization and biogenesis;metabolic process;regulation of biological process;response to stimulus;transport	cytoplasm;nucleus;spliceosomal complex	metal ion binding;nucleotide binding;protein binding;RNA binding;transporter activity	Pf00076, Pf13893, Pf14259	55696	ENSG00000086589.11		RBM22		5	Spliceosome		mRNA Splicing - Major Pathway	5	1.24	0.0164532	0.433092	0.76	257.7	303.3	11.55	9.51	High	High	High	High	High	High	1
FALSE	High	Master Protein	Q8TCT9-1	Minor histocompatibility antigen H13	OS=Homo sapiens]		4	2	5	2	377	41.5	6.43	6.07	2	cell organization and biogenesis;metabolic process	cell surface;endoplasmic reticulum;membrane	catalytic activity;protein binding	Pf04258, Pf06550	81502	ENSG00000101294.16		HM13		20				0	1.24	0.0414842	0.46361	4.69	431.2	574	9.09	10.08	High	High	High	High	High	High	1
FALSE	High	Master Protein	P68104	Elongation factor 1-alpha 1	OS=Homo sapiens]		69	32	178	19	462	50.1	9.01	406.12	32	metabolic process;regulation of biological process;response to stimulus;transport	cytoplasm;cytoskeleton;cytosol;extracellular;membrane;nucleus;organelle lumen	catalytic activity;nucleotide binding;protein binding;RNA binding	Pf00009, Pf03143, Pf03144	1915	ENSG00000156508.17		EEF1A1		6	RNA transport; Legionellosis	Translation Factors	Peptide chain elongation; Protein methylation; Neutrophil degranulation; HSF1 activation	16	1.241	0.00739369	0.433092	2.01	21466.1	27000.1	6.24	7.77	High	High	High	High	High	High	1	Methyl [Q164; K165; R166]
FALSE	High	Master Protein	P09132-1	Signal recognition particle 19 kDa protein	OS=Homo sapiens]		26	2	2	2	144	16.1	9.85	8.82	2	cell organization and biogenesis;response to stimulus;transport	cytoplasm;cytosol	protein binding;RNA binding	Pf01922	6728	ENSG00000153037.13		SRP19		5	Protein export		SRP-dependent cotranslational protein targeting to membrane	4	1.242	0.0239994	0.46361	3.72	161.3	203.4	6.22	1.49	High	High	High	High	High	High	1
FALSE	High	Master Protein	Q92597	Protein NDRG1	OS=Homo sapiens]		30	7	18	7	394	42.8	5.82	52.02	7	cell organization and biogenesis;regulation of biological process;response to stimulus	cytoplasm;cytoskeleton;cytosol;membrane;nucleus	protein binding	Pf00561, Pf03096, Pf12697	10397	ENSG00000104419.14		NDRG1		8		VEGFA-VEGFR2 Signaling Pathway	TP53 regulates transcription of several additional cell death genes whose specific roles in p53-dependent apoptosis remain uncertain	7	1.244	0.00504211	0.433092	3.72	4136.5	5017.6	4.86	2.5	High	High	High	High	High	High	1
FALSE	High	Master Protein	O94760-1	N(G),N(G)-dimethylarginine dimethylaminohydrolase 1	OS=Homo sapiens]		27	5	7	4	285	31.1	5.81	20.75	5	metabolic process;regulation of biological process;response to stimulus	cytosol;mitochondrion	catalytic activity;metal ion binding	Pf02274	23576	ENSG00000153904.18		DDAH1		1		Mesodermal Commitment Pathway	eNOS activation	5	1.245	0.00037264	0.277671	0.61	1644	2055	5.36	4.43	High	High	High	High	High	High	1
FALSE	High	Master Protein	P32929	Cystathionine gamma-lyase	OS=Homo sapiens]		27	9	27	9	405	44.5	6.7	64.74	9	cell organization and biogenesis;metabolic process;regulation of biological process;response to stimulus	cytoplasm;cytosol	catalytic activity;protein binding	Pf00155, Pf00266, Pf01041, Pf01053	1491	ENSG00000116761.11		CTH		1	Selenocompound metabolism; Metabolic pathways; Cysteine and methionine metabolism; Biosynthesis of amino acids; Glycine, serine and threonine metabolism	Selenium Micronutrient Network; Vitamin B12 Metabolism; Folate Metabolism; Trans-sulfuration pathway; Trans-sulfuration and one carbon metabolism; Amino Acid metabolism; One carbon metabolism and related pathways	Metabolism of ingested SeMet, Sec, MeSec into H2Se; Degradation of cysteine and homocysteine; Cysteine formation from homocysteine	19	1.25	0.0204498	0.444234	5.49	5940.9	7071.1	8.38	4.69	High	High	High	High	High	High	1
FALSE	High	Master Protein	P08243-1	Asparagine synthetase	glutamine-hydrolyzing]	OS=Homo sapiens]	29	12	16	12	561	64.3	6.86	41.7	12	cell communication;metabolic process;regulation of biological process;response to stimulus	cytosol	catalytic activity;nucleotide binding;protein binding	Pf00310, Pf00733, Pf12481, Pf13522, Pf13537	440	ENSG00000070669.16		ASNS		7	Alanine, aspartate and glutamate metabolism; Metabolic pathways	Photodynamic therapy-induced unfolded protein response; Amino Acid metabolism	Amino acid synthesis and interconversion (transamination); ATF4 activates genes	11	1.25	0.0429163	0.467006	8.57	2220	2940.1	3.96	7.61	High	High	High	High	High	High	1
FALSE	High	Master Protein	P09211	Glutathione S-transferase P	OS=Homo sapiens]		70	12	81	12	210	23.3	5.64	248.75	12	cell communication;cell proliferation;metabolic process;regulation of biological process;response to stimulus;transport	cytoplasm;cytosol;extracellular;membrane;mitochondrion;nucleus;organelle lumen	antioxidant activity;catalytic activity;enzyme regulator activity;protein binding	Pf00043, Pf02798, Pf14497	2950	ENSG00000084207.15		GSTP1		11	Drug metabolism - cytochrome P450; Metabolism of xenobiotics by cytochrome P450; Chemical carcinogenesis; Pathways in cancer; Platinum drug resistance; Prostate cancer; Glutathione metabolism	NRF2 pathway; Photodynamic therapy-induced NFE2L2 (NRF2) survival signaling; Exercise-induced Circadian Regulation; Arachidonate Epoxygenase / Epoxide Hydrolase; Metapathway biotransformation	Glutathione conjugation; Neutrophil degranulation; Detoxification of Reactive Oxygen Species	22	1.25	0.0518146	0.479125	10.48	16671.5	20846.1	5.3	3.69	High	High	High	High	High	High	1
FALSE	High	Master Protein	Q9BXY0	Protein MAK16 homolog	OS=Homo sapiens]		5	1	2	1	300	35.3	5.38	9.27	1	metabolic process	nucleus	RNA binding	Pf01778, Pf04874	84549	ENSG00000198042.10		MAK16		8				0	1.252	0.0527034	0.479125	0.69	293.2	345.5	8.15	4.48	High	High	High	High	High	High	1
FALSE	Low	Master Protein	Q9H7M9	V-type immunoglobulin domain-containing suppressor of T-cell activation	OS=Homo sapiens]		2	1	1	1	311	33.9	6.95	0	1		membrane	protein binding		64115	ENSG00000107738.19		C10orf54; VSIR		10				0	1.255	0.00440839	0.433092	3.34	1119.3	1404.2	13.44	8.09	High	High	High	High	High	High	1
FALSE	High	Master Protein	Q8TC07-3	Isoform 3 of TBC1 domain family member 15	OS=Homo sapiens]		8	3	6	3	682	78.5	5.35	12.51	3	regulation of biological process;transport	cytoplasm;mitochondrion	enzyme regulator activity;protein binding	Pf00566, Pf12068	64786	ENSG00000121749.15		TBC1D15		12				0	1.255	0.0177776	0.433092	5.63	448.4	546	5.88	1.98	High	High	High	High	High	High	1
FALSE	High	Master Protein	Q9Y2X3	Nucleolar protein 58	OS=Homo sapiens]		21	8	13	8	529	59.5	8.92	28.52	8	cell growth;metabolic process	cytosol;membrane;nucleus	protein binding;RNA binding	Pf01798, Pf08060, Pf08156	51602	ENSG00000055044.10		NOP58		2	Ribosome biogenesis in eukaryotes		Major pathway of rRNA processing in the nucleolus and cytosol; rRNA modification in the nucleus and cytosol; SUMOylation of RNA binding proteins	11	1.259	0.000736902	0.366014	0.9	1824.1	2256.1	3.11	2.41	High	High	High	High	High	High	1
FALSE	High	Master Protein	O43175	D-3-phosphoglycerate dehydrogenase	OS=Homo sapiens]		47	25	87	25	533	56.6	6.71	185.41	25	metabolic process	cytosol	catalytic activity;nucleotide binding	Pf00389, Pf02826	26227	ENSG00000092621.11		PHGDH		1	Metabolic pathways; Glycine, serine and threonine metabolism; Biosynthesis of amino acids; Carbon metabolism	Trans-sulfuration and one carbon metabolism	Serine biosynthesis	9	1.267	0.0409131	0.46361	2.97	25932	32563.5	4.63	3.04	High	High	High	High	High	High	1
FALSE	High	Master Protein	O00571	ATP-dependent RNA helicase DDX3X	OS=Homo sapiens]		47	25	52	24	662	73.2	7.18	103.07	25	cell death;cell organization and biogenesis;defense response;metabolic process;regulation of biological process;response to stimulus;transport	cytoplasm;cytosol;extracellular;membrane;mitochondrion;nucleus;organelle lumen	catalytic activity;DNA binding;enzyme regulator activity;nucleotide binding;protein binding;RNA binding	Pf00270, Pf00271, Pf04851	1654	ENSG00000215301.9		DDX3X		X	Viral carcinogenesis; RIG-I-like receptor signaling pathway; Hepatitis B	RIG-I-like Receptor Signaling	Neutrophil degranulation	7	1.268	0.0262698	0.46361	4.46	14593.3	17663.5	3.32	5.13	High	High	High	High	High	High	1
FALSE	High	Master Protein	Q8NE71-1	ATP-binding cassette sub-family F member 1	OS=Homo sapiens]		13	10	17	9	845	95.9	6.8	34.99	10	defense response;metabolic process;regulation of biological process;response to stimulus;transport	cytoplasm;cytosol;membrane;nucleus;ribosome	catalytic activity;nucleotide binding;protein binding;RNA binding;translation regulator activity	Pf00005, Pf13304	23	ENSG00000225989.9; ENSG00000232169.9; ENSG00000204574.12; ENSG00000206490.11; ENSG00000236149.9; ENSG00000236342.8; ENSG00000231129.8		ABCF1		6; CHR_HSCHR6_MHC_SSTO_CTG1; CHR_HSCHR6_MHC_DBB_CTG1; CHR_HSCHR6_MHC_QBL_CTG1; CHR_HSCHR6_MHC_COX_CTG1; CHR_HSCHR6_MHC_MCF_CTG1; CHR_HSCHR6_MHC_MANN_CTG1			ABC-family proteins mediated transport	2	1.269	0.0485268	0.479125	2.76	3353	3937.4	5.73	6.08	High	High	High	High	High	High	1
FALSE	Low	Master Protein	Q9UII4	E3 ISG15--protein ligase HERC5	OS=Homo sapiens]		1	1	1	1	1024	116.8	7.65	0	1	defense response;metabolic process;regulation of biological process;response to stimulus	cytoplasm;cytosol	catalytic activity;protein binding;RNA binding	Pf00415, Pf00632, Pf13540	51191	ENSG00000138646.8		HERC5		4			ISG15 antiviral mechanism; Antigen processing: Ubiquitination & Proteasome degradation; Negative regulators of DDX58/IFIH1 signaling	11	1.271	0.00674223	0.433092	6.83	592.6	753.4	16.62	10.53	High	High	High	High	High	High	1
FALSE	High	Master Protein	Q9BZF1-1	Oxysterol-binding protein-related protein 8	OS=Homo sapiens]		3	1	1	1	889	101.1	6.96	2.92	1	cell differentiation;cell organization and biogenesis;metabolic process;regulation of biological process;transport	cytosol;endoplasmic reticulum;membrane;nucleus	transporter activity	Pf00169, Pf01237	114882	ENSG00000091039.16		OSBPL8		12			Acyl chain remodelling of PS	5	1.271	0.012072	0.433092	2.92	34.5	43	13.06	14.01	High	High	High	High	High	High	1
FALSE	High	Master Protein	O60566	Mitotic checkpoint serine/threonine-protein kinase BUB1 beta	OS=Homo sapiens]		6	5	6	5	1050	119.5	5.27	10.1	5	cell death;cell division;cell organization and biogenesis;cell proliferation;metabolic process;regulation of biological process	chromosome;cytoplasm;cytoskeleton;cytosol;nucleus	catalytic activity;nucleotide binding;protein binding	Pf08311	701	ENSG00000156970.12		BUB1B		15	Cell cycle; HTLV-I infection	Cell Cycle	Inactivation of APC/C via direct inhibition of the APC/C complex; Amplification of signal from unattached kinetochores via a MAD2 inhibitory signal; Separation of Sister Chromatids; Resolution of Sister Chromatid Cohesion; RHO GTPases Activate Formins; Cdc20:Phospho-APC/C mediated degradation of Cyclin A; APC-Cdc20 mediated degradation of Nek2A	29	1.276	0.0394347	0.46361	5.01	1063.5	1295.8	3.23	7.76	High	High	High	High	High	High	1
FALSE	High	Master Protein	P26641	elongation factor 1-gamma	OS=Homo sapiens]		44	19	51	19	437	50.1	6.67	145.11	19	metabolic process;response to stimulus	cytoplasm;cytosol;endoplasmic reticulum;membrane;nucleus	catalytic activity;protein binding;RNA binding	Pf00043, Pf00647, Pf02798, Pf13409, Pf13410, Pf13417, Pf14497	1937	ENSG00000254772.9		EEF1G		11	Legionellosis	Translation Factors	Eukaryotic Translation Elongation	5	1.288	0.00895208	0.433092	4.6	11481.1	15239	10.99	5.74	High	High	High	High	High	High	1
FALSE	High	Master Protein	Q14116	Interleukin-18	OS=Homo sapiens]		35	6	17	6	193	22.3	4.67	18.42	6	cell communication;cell proliferation;defense response;metabolic process;regulation of biological process;response to stimulus	cytosol;extracellular	protein binding	Pf00340	3606	ENSG00000150782.11		IL18		11	Influenza A; Tuberculosis; Rheumatoid arthritis; Malaria; NOD-like receptor signaling pathway; Legionellosis; Salmonella infection; Cytosolic DNA-sensing pathway; Cytokine-cytokine receptor interaction; African trypanosomiasis; Inflammatory bowel disease (IBD)	Nucleotide-binding Oligomerization Domain (NOD) pathway; Corticotropin-releasing hormone signaling pathway; IL1 and megakaryocytes in obesity; Development and heterogeneity of the ILC family; TYROBP Causal Network; Hypertrophy Model	Interleukin-18 signaling; Interleukin-10 signaling; Interleukin-4 and 13 signaling; Interleukin-1 processing	25	1.289	0.0402193	0.46361	11	1487.2	2056.8	12.16	4.47	High	High	High	High	High	High	1
FALSE	High	Master Protein	P56192	Methionine--tRNA ligase, cytoplasmic	OS=Homo sapiens]		18	14	22	14	900	101.1	6.16	28.93	14	cell communication;metabolic process;regulation of biological process;response to stimulus	cytoplasm;cytosol;membrane	catalytic activity;nucleotide binding;protein binding;RNA binding	Pf00043, Pf00133, Pf00458, Pf09334, Pf10978, Pf13409, Pf13410, Pf14497	4141	ENSG00000166986.14		MARS		12	Selenocompound metabolism; Aminoacyl-tRNA biosynthesis		Cytosolic tRNA aminoacylation; SeMet incorporation into proteins	10	1.291	0.00272837	0.433092	3.66	4430.1	5838.8	5.56	2.87	High	High	High	High	High	High	1
FALSE	High	Master Protein	Q9UQN3-1	Charged multivesicular body protein 2b	OS=Homo sapiens]		13	3	3	3	213	23.9	8.76	1.79	3	cell communication;cell organization and biogenesis;cellular homeostasis;metabolic process;regulation of biological process;response to stimulus;transport	cytoplasm;cytosol;endosome;membrane;vacuole	protein binding	Pf03357	25978	ENSG00000083937.8		CHMP2B	CHMP2B	3	Endocytosis		Budding and maturation of HIV virion; Macroautophagy; Endosomal Sorting Complex Required For Transport (ESCRT)	12	1.302	0.053871	0.479125	15	440.9	591.4	9.79	4.17	High	High	High	High	High	High	1
FALSE	High	Master Protein	Q14978-3	Isoform 3 of Nucleolar and coiled-body phosphoprotein 1	OS=Homo sapiens]		36	22	52	1	700	73.7	9.47	38.58	22	cell organization and biogenesis;metabolic process;regulation of biological process	cytoplasm	nucleotide binding;protein binding;RNA binding	Pf05022	9221	ENSG00000166197.16		NOLC1	NOLC1	10				0	1.314	0.00419561	0.433092	0.17	17.8	23.4	1.55	3.8	High	High	High	High	High	High	1
FALSE	High	Master Protein	Q06203	amidophosphoribosyltransferase	OS=Homo sapiens]		12	4	6	4	517	57.4	6.76	14.02	4	cell organization and biogenesis;metabolic process;response to stimulus;transport	cytosol	catalytic activity;metal ion binding	Pf00156, Pf00310, Pf13230, Pf13522, Pf13537	5471	ENSG00000128059.8		PPAT	PPAT	4	Purine metabolism; Metabolic pathways; Alanine, aspartate and glutamate metabolism	Fluoropyrimidine Activity	Purine ribonucleoside monophosphate biosynthesis	8	1.324	0.0389693	0.46361	14.36	1191.4	1683.6	11.35	4.03	High	High	High	High	High	High	1
FALSE	High	Master Protein	P29692-3	Isoform 3 of Elongation factor 1-delta	OS=Homo sapiens]		44	9	25	1	257	28.5	4.92	57.06	9	metabolic process;regulation of biological process;response to stimulus	cytoplasm;cytosol;endoplasmic reticulum;nucleus	DNA binding;protein binding;RNA binding;signal transducer activity	Pf00736, Pf10587	1936	ENSG00000104529.17; ENSG00000273594.4		EEF1D	EEF1D	8; CHR_HSCHR8_3_CTG7		Translation Factors		1	1.338	0.0242502	0.46361	2.91	204.5	270.8	7.41	12.78	High	High	High	High	High	High	1
FALSE	High	Master Protein	Q86TB9	Protein PAT1 homolog 1	OS=Homo sapiens]		2	1	1	1	770	86.8	6.67	6.79	1	cell organization and biogenesis;metabolic process	cytoplasm;cytosol;nucleus	protein binding;RNA binding	Pf09770	219988	ENSG00000166889.13		PATL1	PATL1	11	RNA degradation		mRNA decay by 5' to 3' exoribonuclease	4	1.362	0.0457014	0.478123	7.7	90.2	145.8	17.62	18.83	High	High	High	High	High	High	1
FALSE	High	Master Protein	Q86SE5-1	RNA-binding Raly-like protein	OS=Homo sapiens]		7	2	4	1	291	32.3	7.93	9.5	2		nucleus	protein binding;RNA binding	Pf00076, Pf13893, Pf14259	138046	ENSG00000184672.11		RALYL	RALYL	8				0	1.369	0.0205631	0.444234	10.23	454	621.6	15.67	5.49	High	High	High	High	High	High	1
FALSE	Medium	Master Protein	O14763	Tumor necrosis factor receptor superfamily member 10B	OS=Homo sapiens]		3	1	1	1	440	47.8	5.55	0	1	cell death;cellular component movement;defense response;development;metabolic process;regulation of biological process;response to stimulus	cell surface;membrane	protein binding;receptor activity;signal transducer activity	Pf00020, Pf00531	8795	ENSG00000120889.12		TNFRSF10B	TNFRSF10B	8	Apoptosis; Influenza A; Cytokine-cytokine receptor interaction; p53 signaling pathway; Natural killer cell mediated cytotoxicity; Measles	miRNA Regulation of DNA Damage Response; Apoptosis; Apoptosis-related network due to altered Notch3 in ovarian cancer; DNA Damage Response	Dimerization of procaspase-8; TRAIL signaling; Cell surface interactions at the vascular wall; TP53 Regulates Transcription of Death Receptors and Ligands; Regulation by c-FLIP; CASP8 activity is inhibited	31	1.397	0.00983713	0.433092	0.53	268.1	404.2	12.02	12	High	High	High	High	High	High	1
FALSE	High	Master Protein	P42167	Lamina-associated polypeptide 2, isoforms beta/gamma	OS=Homo sapiens]		16	4	4	4	454	50.6	9.38	3.87	4	regulation of biological process	chromosome;cytoplasm;membrane;nucleus	DNA binding;protein binding	Pf03020, Pf08198	7112	ENSG00000120802.13		TMPO	TMPO	12			Depolymerisation of the Nuclear Lamina; Initiation of Nuclear Envelope Reformation; Clearance of Nuclear Envelope Membranes from Chromatin	11	1.398	0.0195824	0.43752	6.16	342.8	479.3	17.86	8.06	High	High	High	High	High	High	1
FALSE	High	Master Protein	Q8NFJ5	Retinoic acid-induced protein 3	OS=Homo sapiens]		18	5	16	5	357	40.2	8.15	35.24	5	regulation of biological process;response to stimulus	membrane	protein binding;receptor activity;signal transducer activity	Pf00003	9052	ENSG00000013588.7		GPRC5A	GPRC5A	12		GPCRs, Class C Metabotropic glutamate, pheromone		1	1.406	0.0425312	0.465464	4.91	1145.9	1664.6	6.06	13.48	High	High	High	High	High	High	1
FALSE	High	Master Protein	Q9Y450-1	HBS1-like protein	OS=Homo sapiens]		1	1	2	1	684	75.4	6.61	0	1	metabolic process;regulation of biological process;response to stimulus	cytosol;membrane	catalytic activity;nucleotide binding;protein binding;RNA binding	Pf00009, Pf03143, Pf03144, Pf08938	10767	ENSG00000112339.14		HBS1L	HBS1L	6	Legionellosis; mRNA surveillance pathway		mRNA decay by 3' to 5' exoribonuclease	5	1.414	0.00500499	0.433092	5.22	369.5	522.7	18.7	10.43	High	High	High	High	High	High	1
FALSE	High	Master Protein	Q9H0W9	Ester hydrolase C11orf54	OS=Homo sapiens]		8	2	2	2	315	35.1	6.7	6.88	2		nucleus	catalytic activity;metal ion binding;protein binding	Pf08925	28970	ENSG00000182919.14		C11orf54	C11orf54	11				0	1.423	0.0360077	0.46361	2.46	241.7	340	4.67	5.54	High	High	High	High	High	High	1
FALSE	High	Master Protein	Q00534	Cyclin-dependent kinase 6	OS=Homo sapiens]		43	11	25	11	326	36.9	6.46	47.3	11	cell differentiation;cell division;metabolic process;regulation of biological process;response to stimulus	cytoplasm;cytoskeleton;cytosol;nucleus	catalytic activity;nucleotide binding;protein binding	Pf00069, Pf07714	1021	ENSG00000105810.9		CDK6	CDK6	7	Pancreatic cancer; PI3K-Akt signaling pathway; Melanoma; Non-small cell lung cancer; Viral carcinogenesis; Small cell lung cancer; Pathways in cancer; MicroRNAs in cancer; p53 signaling pathway; Hepatitis B; Glioma; Breast cancer; Cell cycle; Chronic myeloid leukemia; Measles	miRNA Regulation of DNA Damage Response; miRNAs involved in DNA damage response; Cell Cycle; Metastatic brain tumor; Signaling Pathways in Glioblastoma; Retinoblastoma (RB) in Cancer; Wnt Signaling Pathway Netpath; G1 to S cell cycle control; DNA Damage Response	Regulation of RUNX1 Expression and Activity; Cyclin D associated events in G1; Oncogene Induced Senescence; Senescence-Associated Secretory Phenotype (SASP); Oxidative Stress Induced Senescence	40	1.435	0.0390447	0.46361	10.52	3566.9	5765.3	9.24	10.96	High	High	High	High	High	High	1
FALSE	High	Master Protein	Q9UKV3-1	Apoptotic chromatin condensation inducer in the nucleus	OS=Homo sapiens]		11	13	18	13	1341	151.8	6.43	36.08	13	cell death;cell differentiation;cell organization and biogenesis;metabolic process;regulation of biological process	cytosol;membrane;nucleus	catalytic activity;protein binding;RNA binding	Pf02037, Pf13893	22985	ENSG00000100813.14		ACIN1	ACIN1	14	Spliceosome; mRNA surveillance pathway; RNA transport		Apoptotic cleavage of cellular proteins	7	1.443	0.00928479	0.433092	4.4	2864.4	4256.6	10.13	4.94	High	High	High	High	High	High	1
FALSE	Low	Master Protein	O15182	Centrin-3	OS=Homo sapiens]		4	1	1	1	167	19.5	4.74	2.4	1	cell division;cell organization and biogenesis	cytoplasm;cytoskeleton;nucleus	metal ion binding;protein binding	Pf00036, Pf13405, Pf13499, Pf13833	1070	ENSG00000153140.8		CETN3	CETN3	5				0	1.473	0.0464771	0.479125	5.94	635	961.1	19.92	9.47	High	High	High	High	High	High	1
FALSE	High	Master Protein	P21796	voltage-dependent anion-selective channel protein 1	OS=Homo sapiens]		43	10	24	10	283	30.8	8.54	60.12	10	cell communication;cell death;cell differentiation;defense response;metabolic process;regulation of biological process;response to stimulus;transport	membrane;mitochondrion;nucleus	protein binding;transporter activity	Pf01459	7416	ENSG00000213585.10		VDAC1	VDAC1	5	Calcium signaling pathway; Huntington's disease; Parkinson's disease; NOD-like receptor signaling pathway; Influenza A; HTLV-I infection; cGMP-PKG signaling pathway		Mitochondrial calcium ion transport; Ub-specific processing proteases; Mitochondrial protein import; Pink/Parkin Mediated Mitophagy	16	1.494	0.0302591	0.46361	17.57	3334.6	5817.1	18.93	10.78	High	High	High	High	High	High	1
FALSE	High	Master Protein	P04183	Thymidine kinase, cytosolic	OS=Homo sapiens]		22	4	8	4	234	25.5	8.51	19.52	4	cell organization and biogenesis;metabolic process	cytoplasm;cytosol	catalytic activity;metal ion binding;nucleotide binding;protein binding	Pf00265	7083	ENSG00000167900.11		TK1	TK1	17	Metabolic pathways; Drug metabolism - other enzymes; Pyrimidine metabolism	Fluoropyrimidine Activity	Activation of E2F1 target genes at G1/S; Pyrimidine salvage	14	1.51	0.0365593	0.46361	5.13	248.7	364	11.35	2.83	High	High	High	High	High	High	1
FALSE	Medium	Master Protein	Q96NX5	Calcium/calmodulin-dependent protein kinase type 1G	OS=Homo sapiens]		3	1	2	1	476	53.1	7.72	5.34	1	metabolic process;regulation of biological process;response to stimulus	cytoplasm;Golgi;membrane	catalytic activity;nucleotide binding;protein binding	Pf00069, Pf07714, Pf14531	57172	ENSG00000008118.9		CAMK1G	CAMK1G	1	Oxytocin signaling pathway; Aldosterone synthesis and secretion			2	1.516	0.0492029	0.479125	7.57	628.5	952.7	6.96	17.1	High	High	High	High	High	High	1
FALSE	High	Master Protein	Q9Y5B9	FACT complex subunit SPT16	OS=Homo sapiens]		9	9	12	9	1047	119.8	5.66	20.52	9	cell organization and biogenesis;metabolic process;regulation of biological process;response to stimulus	chromosome;nucleus	protein binding;RNA binding	Pf00557, Pf08512, Pf08644, Pf14826	11198	ENSG00000092201.9		SUPT16H	SUPT16H	14			HIV elongation arrest and recovery; TP53 Regulates Transcription of DNA Repair Genes; Tat-mediated HIV elongation arrest and recovery; Formation of RNA Pol II elongation complex ; Formation of HIV elongation complex in the absence of HIV Tat; Regulation of TP53 Activity through Phosphorylation; RNA Polymerase II Pre-transcription Events; Pausing and recovery of HIV elongation; Pausing and recover…	24	1.636	0.0157527	0.433092	16.26	1947.9	3187.5	7.59	3.95	High	High	High	High	High	High	1
FALSE	High	Master Protein	P02545	Prelamin-A/C	OS=Homo sapiens]		20	10	23	10	664	74.1	7.02	49.44	10	cell organization and biogenesis;regulation of biological process;response to stimulus;transport	cytosol;membrane;nucleus	protein binding;structural molecule activity	Pf00038, Pf00932	4000	ENSG00000160789.19		LMNA	LMNA	1	Dilated cardiomyopathy; Apoptosis; Arrhythmogenic right ventricular cardiomyopathy (ARVC); Hypertrophic cardiomyopathy (HCM)	Arrhythmogenic Right Ventricular Cardiomyopathy; Adipogenesis; Fas Ligand (FasL) pathway and Stress induction of Heat Shock Proteins (HSP) regulation	Signaling by BRAF and RAF fusions; Breakdown of the nuclear lamina; XBP1(S) activates chaperone genes; Initiation of Nuclear Envelope Reformation; Clearance of Nuclear Envelope Membranes from Chromatin; Depolymerisation of the Nuclear Lamina; Deregulated CDK5 triggers multiple neurodegenerative pathways in Alzheimer's disease models	33	1.747	0.011196	0.433092	1.33	2330.9	3648.7	11.53	12.53	High	High	High	High	High	High	1
FALSE	High	Master Protein	P41567	eukaryotic translation initiation factor 1	OS=Homo sapiens]		65	5	9	5	113	12.7	7.44	26.15	5	metabolic process;regulation of biological process;response to stimulus	cytoplasm;nucleus	protein binding;RNA binding	Pf01253	10209	ENSG00000173812.10		EIF1	EIF1	17	RNA transport	Translation Factors		2	1.862	0.0177726	0.433092	1.08	926.2	1714	2.24	10.87	High	High	High	High	High	High	1
FALSE	High	Master Protein	Q14978-1	nucleolar and coiled-body phosphoprotein 1	OS=Homo sapiens]		36	22	53	1	699	73.6	9.47	40.21	22	cell organization and biogenesis;metabolic process;regulation of biological process	cytoplasm;nucleus	nucleotide binding;protein binding;RNA binding	Pf05022	9221	ENSG00000166197.16		NOLC1	NOLC1	10				0	2.1	0.051073	0.479125	24.7	72.2	151.5	27.28	12.02	High	High	High	High	High	High	1
FALSE	High	Master Protein	Q9H0H5	Rac GTPase-activating protein 1	OS=Homo sapiens]		3	3	4	3	632	71	8.88	8.41	3	cell differentiation;cell division;cell organization and biogenesis;cell proliferation;cellular component movement;development;metabolic process;regulation of biological process;response to stimulus;transport	cytoplasm;cytoskeleton;cytosol;endosome;membrane;nucleus	catalytic activity;enzyme regulator activity;metal ion binding;nucleotide binding;protein binding	Pf00130, Pf00620, Pf07888	29127	ENSG00000161800.12		RACGAP1	RACGAP1	12		Signal Transduction of S1P Receptor; Wnt Signaling Pathway and Pluripotency	COPI-dependent Golgi-to-ER retrograde traffic; Kinesins; Rho GTPase cycle; MHC class II antigen presentation	16	2.227	0.0496872	0.479125	40.69	49.7	125.9	31.89	13.87	High	High	High	High	High	High	1
FALSE	High	Master Protein	P62745	Rho-related GTP-binding protein RhoB	OS=Homo sapiens]		12	3	4	3	196	22.1	5.24	2.48	3	cell death;cell differentiation;development;regulation of biological process;response to stimulus;transport	cytosol;endosome;membrane;nucleus	catalytic activity;nucleotide binding;protein binding	Pf00025, Pf00071, Pf08477	388	ENSG00000143878.9		RHOB	RHOB	2		Androgen receptor signaling pathway; Neural Crest Differentiation; Spinal Cord Injury; Focal Adhesion	G alpha (12/13) signalling events; RHO GTPases Activate ROCKs; GPVI-mediated activation cascade; Sema4D induced cell migration and growth-cone collapse; Rho GTPase cycle; RHO GTPases Activate Formins; RHO GTPases activate CIT; RHO GTPases activate PKNs; RHO GTPases Activate Rhotekin and Rhophilins	24	2.247	0.00752584	0.433092	4.04	245.5	586.9	14.21	5.16	High	High	High	High	High	High	1	Methyl [K7]
FALSE	High	Master Protein	O75531	Barrier-to-autointegration factor	OS=Homo sapiens]		58	6	10	6	89	10.1	6.09	15.54	6	cell organization and biogenesis;metabolic process;regulation of biological process;response to stimulus;transport	chromosome;cytoplasm;cytosol;nucleus	DNA binding;protein binding	Pf02961	8815	ENSG00000175334.7		BANF1	BANF1	11			2-LTR circle formation; APOBEC3G mediated resistance to HIV-1 infection; Integration of viral DNA into host genomic DNA; Vpr-mediated nuclear import of PICs; Autointegration results in viral DNA circles; Initiation of Nuclear Envelope Reformation; Clearance of Nuclear Envelope Membranes from Chromatin	23	3.516	0.0139945	0.433092	12.29	467.9	1645.2	6.46	16.49	High	High	High	High	High	High	1
